# Supplementary material for: Estimation of Copy Number Alterations from Exome Sequencing Data
Source: PubMed Central journal article supplement (PMC3526607; doi:10.1371/journal.pone.0051422), 2012-12-19
Supplement: pone.0051422.s001.pdf [file pone.0051422.s001.pdf]

| aCGH     |       |           |           |           |         |       | EXOME |           |           |           |         |         |
|----------|-------|-----------|-----------|-----------|---------|-------|-------|-----------|-----------|-----------|---------|---------|
| CASE     | CHROM | START     | END       | LOG2RATIO | # EXONS | FOUND | CHROM | START     | END       | LOG2RATIO | # EXONS | StdDev  |
| CLL270TD | chr1  | 15929364  | 15943278  | -0.7922   | 0       | NO    |       |           |           |           |         |         |
| CLL027TD | chr1  | 21681195  | 21725823  | -0.7741   | 0       | NO    |       |           |           |           |         |         |
| CLL145TD | chr1  | 41572891  | 43287342  | -0.7145   | 110     | YES   | chr1  | 41578866  | 43282098  | -0.8159   | 110     | -3.3368 |
| CLL152TD | chr1  | 48823119  | 48879073  | -0.9446   | 8       | NO    |       |           |           |           |         |         |
| CLL155TD | chr1  | 78433832  | 78452941  | -0.8181   | 4       | YES   | chr1  | 78432316  | 78444463  | -0.8221   | 8       | -3.1091 |
| CLL152TD | chr1  | 113461274 | 113580282 | -0.8756   | 2       | NO    |       |           |           |           |         |         |
| CLL276TD | chr1  | 153967305 | 154126545 | -0.2614   | 36      | NO    |       |           |           |           |         |         |
| CLL117TD | chr1  | 197743592 | 197752665 | 0.9784    | 0       | NO    |       |           |           |           |         |         |
| CLL178TD | chr1  | 202322285 | 202538415 | 0.2841    | 29      | NO    |       |           |           |           |         |         |
| CLL100TD | chr1  | 231918632 | 231957257 | -0.4835   | 5       | NO    |       |           |           |           |         |         |
| CLL152TD | chr1  | 249197503 | 249220091 | -0.6401   | 2       | NO    |       |           |           |           |         |         |
| CLL027TD | chr10 | 503201    | 569067    | -0.5479   | 3       | NO    |       |           |           |           |         |         |
| CLL049TD | chr10 | 102641828 | 106419703 | -0.7237   | 638     | YES   | chr10 | 102675717 | 106214143 | -0.8608   | 638     | -3.2902 |
| CLL141TD | chr10 | 103634312 | 104177223 | -1.0034   | 133     | YES   | chr10 | 103649117 | 104176108 | -1.0251   | 133     | -3.9548 |
| CLL178TD | chr10 | 104159664 | 104853373 | -0.7501   | 130     | YES   | chr10 | 104160862 | 104852860 | -0.8987   | 126     | -2.9443 |
| CLL064TD | chr10 | 104161255 | 104192055 | -0.7374   | 22      | YES   | chr10 | 104160694 | 104196244 | -0.6812   | 25      | -1.9207 |
| CLL157TD | chr10 | 104368438 | 104419240 | -0.3115   | 12      | NO    |       |           |           |           |         |         |
| CLL178TD | chr10 | 105007763 | 105100437 | -0.8027   | 7       | YES   | chr10 | 105036937 | 105093635 | -0.8543   | 7       | -3.1110 |
| CLL017TD | chr11 | 33880105  | 33895469  | -1.1002   | 2       | NO    |       |           |           |           |         |         |
| CLL184TD | chr11 | 42655597  | 45369571  | -0.7617   | 140     | YES   | chr11 | 43333651  | 45277209  | -0.9153   | 140     | -3.4682 |
| CLL042TD | chr11 | 76513928  | 117661843 | -0.4171   | 2028    | YES   | chr11 | 76956316  | 116656464 | -0.4984   | 1805    | -2.9969 |
| CLL023TD | chr11 | 77179449  | 117609214 | -0.8262   | 1961    | YES   | chr11 | 77300986  | 77924655  | -1.0005   | 80      | -3.5747 |
| CLL006TD | chr11 | 78240712  | 116777756 | -0.9000   | 1734    | YES   | chr11 | 78270534  | 89449046  | -0.9866   | 331     | -3.9747 |
| CLL038TD | chr11 | 78764165  | 80319824  | -0.5023   | 4       | NO    |       |           |           |           |         |         |
| CLL290TD | chr11 | 79590720  | 116062438 | -0.8491   | 1643    | YES   | chr11 | 82533422  | 89608133  | -0.9468   | 311     | -3.8275 |
| CLL155TD | chr11 | 85264544  | 85274227  | -2.6815   | 0       | NO    |       |           |           |           |         |         |
| CLL054TD | chr11 | 86053929  | 114937176 | -0.7975   | 1462    | YES   | chr11 | 86055583  | 114578256 | -0.9208   | 1462    | -3.8902 |
| CLL117TD | chr11 | 88542659  | 88551726  | 0.9070    | 0       | NO    |       |           |           |           |         |         |
| CLL178TD | chr11 | 92513723  | 133254506 | -0.8701   | 2738    | YES   | chr11 | 92523066  | 102398480 | -0.8893   | 400     | -4.3660 |
| CLL041TD | chr11 | 94769441  | 123056760 | -0.6585   | 1930    | YES   | chr11 | 94800334  | 111941112 | -0.6348   | 834     | -3.0826 |
| CLL278TD | chr11 | 96159104  | 116753164 | -0.8110   | 1063    | YES   | chr11 | 99690199  | 116747578 | -0.9151   | 1061    | -4.0853 |
| CLL184TD | chr11 | 101194338 | 117964476 | -0.5119   | 1171    | YES   | chr11 | 101324358 | 103027067 | -0.8296   | 178     | -4.1564 |
| CLL145TD | chr11 | 101389939 | 134945306 | -0.7980   | 2517    | YES   | chr11 | 101761989 | 134320539 | -0.8880   | 2517    | -3.7222 |
| CLL017TD | chr11 | 105820665 | 128506612 | -0.8830   | 1913    | YES   | chr11 | 105836610 | 128564063 | -0.9707   | 1914    | -3.7459 |
| CLL063TD | chr11 | 106420522 | 108122884 | -0.8464   | 128     | YES   | chr11 | 106558228 | 108122540 | -1.0001   | 128     | -4.2278 |
| CLL038TD | chr11 | 109139541 | 113781239 | -0.6921   | 338     | YES   | chr11 | 109294356 | 113779976 | -0.7561   | 338     | -3.2607 |
| CLL063TD | chr11 | 110211047 | 116153447 | -0.8626   | 388     | YES   | chr11 | 110306499 | 115110946 | -0.9450   | 388     | -3.9442 |
| CLL100TD | chr11 | 134890599 | 134945306 | -0.5205   | 0       | NO    |       |           |           |           |         |         |
| CLL027TD | chr11 | 134901640 | 134945306 | -0.6690   | 0       | NO    |       |           |           |           |         |         |
| CLL152TD | chr11 | 134908232 | 134945306 | -0.9068   | 0       | NO    |       |           |           |           |         |         |
| CLL275TD | chr12 | 163393    | 34756350  | 0.5169    | 2808    | YES   | chr12 | 148430    | 346239    | 0.7021    | 36      | 3.3612  |
| CLL005TD | chr12 | 163393    | 34533264  | 0.5302    | 2821    | YES   | chr12 | 148430    | 48191104  | 0.5231    | 3471    | 3.5899  |
| CLL277TD | chr12 | 163393    | 34756350  | 0.4735    | 2822    | YES   | chr12 | 73256     | 6438371   | 0.4235    | 590     | 2.5946  |
| CLL148TD | chr12 | 189361    | 34756350  | 0.4976    | 2776    | YES   | chr12 | 278134    | 347073    | 0.8518    | 26      | 3.1842  |
| CLL064TD | chr12 | 189361    | 34417592  | 0.5136    | 2804    | YES   | chr12 | 148430    | 645362    | 0.4080    | 81      | 3.0082  |
| CLL045TD | chr12 | 189361    | 34756350  | 0.4822    | 2805    | YES   | chr12 | 148999    | 3149497   | 0.4568    | 352     | 2.6347  |
| CLL082TD | chr12 | 191809    | 34756350  | 0.5293    | 2769    | YES   | chr12 | 332288    | 6861035   | 0.4501    | 740     | 2.5129  |
| CLL032TD | chr12 | 191809    | 34756350  | 0.4431    | 2789    | YES   | chr12 | 87509     | 7343411   | 0.5589    | 965     | 3.0818  |
| CLL282TD | chr12 | 194049    | 34756350  | 0.5133    | 2789    | YES   | chr12 | 148430    | 6125206   | 0.5052    | 525     | 3.1675  |
| CLL166TD | chr12 | 250702    | 34360180  | 0.4152    | 2810    | YES   | chr12 | 148430    | 9596082   | 0.5140    | 1354    | 3.2107  |
| CLL282TD | chr12 | 37957940  | 133779217 | 0.4997    | 8113    | YES   | chr12 | 8329466   | 48119078  | 0.5237    | 2283    | 3.7832  |
| CLL275TD | chr12 | 37957940  | 133779217 | 0.5145    | 8151    | YES   | chr12 | 31265139  | 48104523  | 0.4897    | 745     | 2.9494  |
| CLL277TD | chr12 | 37957940  | 133779217 | 0.4656    | 8159    | YES   | chr12 | 9726035   | 50474278  | 0.4501    | 2606    | 2.8220  |
| CLL082TD | chr12 | 38448467  | 133779217 | 0.5185    | 8096    | YES   | chr12 | 9747823   | 48096426  | 0.5740    | 2020    | 4.4115  |
| CLL064TD | chr12 | 38448467  | 133779217 | 0.4811    | 8132    | YES   | chr12 | 33529740  | 48372310  | 0.5683    | 688     | 4.1040  |
| CLL032TD | chr12 | 38453410  | 133779217 | 0.4287    | 8061    | YES   | chr12 | 31242290  | 48096426  | 0.4137    | 758     | 4.1407  |
| CLL005TD | chr12 | 38453410  | 133779217 | 0.5251    | 8176    | YES   | chr12 | 148430    | 48191104  | 0.5231    | 3471    | 3.5899  |
| CLL148TD | chr12 | 38503256  | 133779217 | 0.4875    | 8100    | YES   | chr12 | 31265139  | 48104523  | 0.4001    | 744     | 3.3445  |
| CLL045TD | chr12 | 38503256  | 133779217 | 0.4753    | 8112    | YES   | chr12 | 3310330   | 57596111  | 0.4915    | 5249    | 3.0283  |
| CLL166TD | chr12 | 38572477  | 133779217 | 0.3933    | 8121    | YES   | chr12 | 9747823   | 120802447 | 0.5088    | 8316    | 3.3625  |
| CLL192TD | chr12 | 57562548  | 57636170  | 0.2970    | 80      | NO    |       |           |           |           |         |         |
| CLL023TD | chr12 | 96282247  | 96330768  | -0.4998   | 9       | NO    |       |           |           |           |         |         |
| CLL027TD | chr12 | 96284782  | 96330768  | -0.5886   | 7       | NO    |       |           |           |           |         |         |
| CLL145TD | chr12 | 121860338 | 123047826 | -0.7281   | 222     | YES   | chr12 | 121861133 | 123048222 | -0.8112   | 223     | -3.0364 |
| CLL141TD | chr13 | 20906308  | 22405579  | -0.9435   | 111     | YES   | chr13 | 20978234  | 21729228  | -0.9476   | 72      | -3.7309 |
| CLL146TD | chr13 | 34752795  | 70922816  | -0.7916   | 1217    | YES   | chr13 | 34837007  | 70681587  | -0.9006   | 1217    | -3.7898 |
| CLL110TD | chr13 | 38733308  | 53483162  | -0.7936   | 919     | YES   | chr13 | 38923997  | 52293288  | -0.7827   | 764     | -3.3982 |
| CLL194TD | chr13 | 41434188  | 52354921  | -0.9053   | 667     | YES   | chr13 | 41485871  | 44476730  | -0.9826   | 204     | -3.6015 |
| CLL182TD | chr13 | 41469090  | 42757672  | -0.3043   | 123     | NO    |       |           |           |           |         |         |
| CLL321TD | chr13 | 41561808  | 52237129  | -0.8764   | 652     | YES   | chr13 | 41635750  | 50510258  | -0.8777   | 585     | -3.9145 |

|          |       |           |           |         |     |     |       |           |           |         |     |         |
|----------|-------|-----------|-----------|---------|-----|-----|-------|-----------|-----------|---------|-----|---------|
| CLL189TD | chr13 | 46334152  | 82152329  | -0.4679 | 931 | YES | chr13 | 46357452  | 80910886  | -0.5062 | 931 | -2.0621 |
| CLL192TD | chr13 | 46913252  | 51522316  | -0.7334 | 254 | YES | chr13 | 46917419  | 51522103  | -0.7799 | 254 | -3.9047 |
| CLL141TD | chr13 | 46915859  | 73435221  | -0.8720 | 596 | YES | chr13 | 46917419  | 73428183  | -0.9020 | 596 | -3.6167 |
| CLL188TD | chr13 | 47295273  | 53161169  | -0.9120 | 395 | YES | chr13 | 47297320  | 50505091  | -1.0137 | 196 | -3.8394 |
| CLL267TD | chr13 | 47507142  | 62915894  | -0.7481 | 462 | YES | chr13 | 48517452  | 62334304  | -0.8706 | 462 | -3.6216 |
| CLL030TD | chr13 | 47563657  | 53040052  | -0.8205 | 363 | YES | chr13 | 48517452  | 53016485  | -0.8124 | 355 | -3.4252 |
| CLL083TD | chr13 | 47946084  | 65226370  | -0.8482 | 470 | YES | chr13 | 48517452  | 64417580  | -0.9101 | 470 | -3.6942 |
| CLL027TD | chr13 | 48501167  | 51571802  | -0.8240 | 202 | YES | chr13 | 48517452  | 51527990  | -0.8010 | 201 | -3.5821 |
| CLL272TD | chr13 | 48569200  | 51600231  | -0.6386 | 204 | YES | chr13 | 48570947  | 49822963  | -0.9082 | 88  | -3.8393 |
| CLL172TD | chr13 | 48629192  | 50438731  | -0.7113 | 163 | YES | chr13 | 48651240  | 50366552  | -0.7516 | 163 | -3.3188 |
| CLL279TD | chr13 | 48703533  | 52885510  | -0.8388 | 318 | YES | chr13 | 48708461  | 52863912  | -0.8923 | 318 | -3.8150 |
| CLL181TD | chr13 | 48740315  | 52314639  | -0.4214 | 230 | YES | chr13 | 48827887  | 50505091  | -0.3781 | 159 | -1.6611 |
| CLL186TD | chr13 | 48740315  | 52707274  | -0.5630 | 293 | YES | chr13 | 48827887  | 52701409  | -0.5998 | 293 | -2.8210 |
| CLL184TD | chr13 | 48858287  | 58200326  | -0.7885 | 391 | YES | chr13 | 48881358  | 57747585  | -0.8533 | 391 | -3.6616 |
| CLL117TD | chr13 | 48909694  | 51700648  | -0.5751 | 185 | YES | chr13 | 48916672  | 50495604  | -0.4543 | 149 | -2.1713 |
| CLL053TD | chr13 | 48919079  | 51700648  | -0.6254 | 186 | YES | chr13 | 48941624  | 51603719  | -0.5964 | 179 | -2.8316 |
| CLL013TD | chr13 | 49759884  | 51581416  | -0.7134 | 121 | YES | chr13 | 49760048  | 50123538  | -0.6573 | 62  | -2.9704 |
| CLL157TD | chr13 | 49813764  | 51593526  | -0.8986 | 113 | YES | chr13 | 49822963  | 51594513  | -0.9695 | 114 | -4.0961 |
| CLL144TD | chr13 | 50389525  | 51568793  | -0.7145 | 27  | YES | chr13 | 50366552  | 51508957  | -0.7432 | 22  | -2.7499 |
| CLL280TD | chr13 | 50432170  | 51645041  | -0.8038 | 39  | YES | chr13 | 50489187  | 51397432  | -1.0093 | 15  | -3.9806 |
| CLL172TD | chr13 | 50506691  | 51479294  | -1.7397 | 13  | YES | chr13 | 50510258  | 50747127  | -1.9621 | 10  | -6.6197 |
| CLL274TD | chr13 | 50516370  | 50568119  | -0.6611 | 0   | NO  |       |           |           |         |     |         |
| CLL136TD | chr13 | 50516370  | 51526121  | -0.7490 | 20  | YES | chr13 | 50586025  | 51504796  | -0.8482 | 15  | -3.0379 |
| CLL174TD | chr13 | 50520557  | 51527535  | -2.6065 | 21  | YES | chr13 | 50586025  | 51417260  | -3.6344 | 13  | -7.3596 |
| CLL159TD | chr13 | 50557545  | 51375978  | -1.2829 | 10  | YES | chr13 | 50586025  | 51287304  | -1.5641 | 10  | -5.6372 |
| CLL040TD | chr13 | 50557545  | 51372504  | -2.1297 | 10  | YES | chr13 | 50586025  | 51287304  | -4.5222 | 10  | -8.5208 |
| CLL052TD | chr13 | 50559222  | 51551357  | -0.4880 | 22  | YES | chr13 | 50586025  | 51523559  | -0.4579 | 20  | -1.9180 |
| CLL274TD | chr13 | 50569953  | 51469532  | -1.6291 | 12  | YES | chr13 | 50586025  | 51416933  | -2.2354 | 12  | -6.4344 |
| CLL323TD | chr13 | 50569953  | 51483819  | -0.6924 | 13  | YES | chr13 | 50495604  | 51417260  | -0.6220 | 16  | -3.3454 |
| CLL041TD | chr13 | 50608201  | 51501750  | -0.6374 | 11  | YES | chr13 | 50623062  | 51501518  | -0.6784 | 11  | -2.7956 |
| CLL322TD | chr13 | 50616393  | 51553735  | -2.4118 | 20  | YES | chr13 | 50623062  | 51530431  | -3.5042 | 20  | -6.8704 |
| CLL040TD | chr13 | 51377832  | 51540139  | -0.3716 | 12  | YES | chr13 | 51397432  | 51530431  | -0.9708 | 12  | -3.9321 |
| CLL323TD | chr13 | 51490556  | 51626656  | -0.2578 | 22  | NO  |       |           |           |         |     |         |
| CLL280TD | chr13 | 51646339  | 52126200  | -0.2566 | 30  | NO  |       |           |           |         |     |         |
| CLL322TD | chr13 | 57759170  | 57787540  | 0.7874  | 0   | NO  |       |           |           |         |     |         |
| CLL184TD | chr13 | 61436425  | 61921871  | -0.8754 | 0   | NO  |       |           |           |         |     |         |
| CLL027TD | chr13 | 115079411 | 115105438 | -0.7692 | 1   | NO  |       |           |           |         |     |         |
| CLL152TD | chr13 | 115086654 | 115105438 | -0.8995 | 1   | NO  |       |           |           |         |     |         |
| CLL141TD | chr14 | 20760146  | 20765549  | -0.9383 | 4   | YES | chr14 | 20697540  | 20764486  | -0.7731 | 7   | -2.4436 |
| CLL027TD | chr14 | 20964303  | 20983196  | -0.7496 | 2   | NO  |       |           |           |         |     |         |
| CLL027TD | chr14 | 21155125  | 21201487  | -0.6704 | 2   | NO  |       |           |           |         |     |         |
| CLL277TD | chr14 | 22965689  | 22994535  | 0.5488  | 24  | NO  |       |           |           |         |     |         |
| CLL141TD | chr14 | 58585617  | 58808196  | -0.9673 | 37  | YES | chr14 | 58598184  | 58796653  | -0.9766 | 37  | -3.7360 |
| CLL054TD | chr14 | 106168179 | 106330568 | -0.3498 | 31  | NO  |       |           |           |         |     |         |
| CLL159TD | chr14 | 106168179 | 106410678 | -0.7433 | 62  | YES | chr14 | 106130944 | 106329377 | -1.3216 | 37  | -2.2826 |
| CLL144TD | chr14 | 106168179 | 106777490 | -0.9957 | 96  | YES | chr14 | 106174088 | 106209080 | -1.2127 | 10  | -2.5395 |
| CLL186TD | chr14 | 106168179 | 106811048 | -1.0292 | 109 | YES | chr14 | 106204080 | 106237415 | -5.5469 | 15  | -4.5364 |
| CLL052TD | chr14 | 106168179 | 107015590 | -1.4376 | 124 | YES | chr14 | 106130944 | 106330387 | -1.7185 | 36  | -3.0434 |
| CLL145TD | chr14 | 106168179 | 107083152 | -0.6834 | 141 | YES | chr14 | 106204080 | 106209080 | -2.6671 | 6   | -4.4185 |
| CLL174TD | chr14 | 106243009 | 106322375 | -0.7534 | 9   | YES | chr14 | 106232232 | 106329987 | -0.8755 | 20  | -2.0385 |
| CLL039TD | chr14 | 106243009 | 106538621 | -1.0335 | 17  | NO  |       |           |           |         |     |         |
| CLL290TD | chr14 | 106243009 | 106561323 | -0.8239 | 55  | YES | chr14 | 106304633 | 106329987 | -1.0331 | 13  | -2.3069 |
| CLL178TD | chr14 | 106243009 | 106691076 | -0.9101 | 68  | YES | chr14 | 106232232 | 106321000 | -1.2260 | 17  | -2.4237 |
| CLL009TD | chr14 | 106243009 | 106734526 | -0.7843 | 79  | YES | chr14 | 106304633 | 106330387 | -0.8045 | 12  | -1.7481 |
| CLL017TD | chr14 | 106243009 | 106827263 | -1.0022 | 82  | YES | chr14 | 106232232 | 106329377 | -0.9118 | 19  | -2.3284 |
| CLL040TD | chr14 | 106243009 | 106827263 | -0.3900 | 88  | YES | chr14 | 106232232 | 106330760 | -1.2225 | 22  | -2.2656 |
| CLL110TD | chr14 | 106243009 | 107094934 | -0.7319 | 126 | YES | chr14 | 106232232 | 106330387 | -1.1768 | 21  | -2.5712 |
| CLL008TD | chr14 | 106243009 | 107167303 | -0.8026 | 131 | YES | chr14 | 106304633 | 106329987 | -0.7630 | 12  | -2.1526 |
| CLL045TD | chr14 | 106243009 | 107179117 | -0.7934 | 132 | YES | chr14 | 106232232 | 106330760 | -3.0340 | 24  | -3.6521 |
| CLL136TD | chr14 | 106252596 | 106303121 | -0.7909 | 0   | YES | chr14 | 106237415 | 106329987 | -0.6444 | 11  | -2.3135 |
| CLL276TD | chr14 | 106252596 | 106303121 | -0.8381 | 0   | YES | chr14 | 106188116 | 106329377 | -1.0992 | 28  | -1.9216 |
| CLL280TD | chr14 | 106252596 | 106322375 | -0.7332 | 9   | YES | chr14 | 106232232 | 106329987 | -1.0074 | 20  | -2.3658 |
| CLL172TD | chr14 | 106252596 | 106322375 | -0.7866 | 10  | YES | chr14 | 106304633 | 106321986 | -1.0642 | 10  | -2.3240 |
| CLL322TD | chr14 | 106252596 | 106411088 | -0.9570 | 45  | YES | chr14 | 106204080 | 106329987 | -1.0533 | 28  | -1.6795 |
| CLL048TD | chr14 | 106252596 | 106561323 | -1.9852 | 51  | YES | chr14 | 106188116 | 106366443 | -3.4155 | 37  | -3.7502 |
| CLL278TD | chr14 | 106252596 | 106691076 | -0.6082 | 70  | YES | chr14 | 106304633 | 106329987 | -0.8399 | 12  | -1.6766 |
| CLL064TD | chr14 | 106252596 | 106779188 | -0.8215 | 83  | YES | chr14 | 106232232 | 106329377 | -0.9631 | 21  | -2.2028 |
| CLL197TD | chr14 | 106252596 | 106829408 | -0.7154 | 87  | YES | chr14 | 106232232 | 106330387 | -1.0805 | 21  | -1.9559 |
| CLL043TD | chr14 | 106252596 | 106829408 | -1.7132 | 88  | YES | chr14 | 106232232 | 106307218 | -2.8044 | 11  | -4.2632 |
| CLL173TD | chr14 | 106252596 | 106831538 | -1.9681 | 92  | YES | chr14 | 106304633 | 106405971 | -9.9367 | 45  | -3.6496 |
| CLL191TD | chr14 | 106252596 | 107012899 | -0.8324 | 107 | YES | chr14 | 106235554 | 106329987 | -0.6049 | 18  | -1.7845 |
| CLL192TD | chr14 | 106252596 | 107208787 | -0.6230 | 137 | YES | chr14 | 106188116 | 106346841 | -4.7516 | 37  | -3.9438 |
| CLL184TD | chr14 | 106257663 | 107048607 | -0.8605 | 120 | YES | chr14 | 106237415 | 106330387 | -1.0780 | 15  | -1.6901 |

|          |       |           |           |         |     |     |       |           |           |          |    |         |
|----------|-------|-----------|-----------|---------|-----|-----|-------|-----------|-----------|----------|----|---------|
| CLL282TD | chr14 | 106263491 | 106322375 | -0.8652 | 11  | YES | chr14 | 106304633 | 106329987 | -0.7720  | 13 | -1.9926 |
| CLL023TD | chr14 | 106320095 | 107169498 | -0.7311 | 122 | YES | chr14 | 106329987 | 106379028 | -7.5893  | 25 | -2.8851 |
| CLL027TD | chr14 | 106320095 | 107182803 | -0.8139 | 131 | YES | chr14 | 106330387 | 106356996 | -8.9239  | 11 | -2.8816 |
| CLL157TD | chr14 | 106326556 | 106526710 | -0.9814 | 43  | YES | chr14 | 106330760 | 106363769 | -9.9654  | 14 | -3.0537 |
| CLL141TD | chr14 | 106330168 | 106345551 | -4.2148 | 3   | YES | chr14 | 106329987 | 106375713 | -9.9491  | 20 | -3.1210 |
| CLL032TD | chr14 | 106330168 | 106345551 | -3.2441 | 3   | YES | chr14 | 106330387 | 106379028 | -6.9021  | 21 | -2.9824 |
| CLL018TD | chr14 | 106330168 | 106345551 | -4.5924 | 3   | NO  |       |           |           |          |    |         |
| CLL053TD | chr14 | 106330168 | 106345551 | -3.5836 | 3   | YES | chr14 | 106330760 | 106379028 | -7.8069  | 23 | -2.9223 |
| CLL277TD | chr14 | 106330168 | 106345551 | -3.9939 | 4   | YES | chr14 | 106329987 | 106378065 | -9.7456  | 25 | -2.9875 |
| CLL279TD | chr14 | 106330168 | 106345551 | -3.1367 | 4   | YES | chr14 | 106329377 | 106359349 | -3.3636  | 15 | -2.5594 |
| CLL266TD | chr14 | 106330168 | 106345551 | -3.2449 | 5   | YES | chr14 | 106330387 | 106370493 | -7.8500  | 21 | -2.9798 |
| CLL083TD | chr14 | 106330168 | 106345551 | -3.4146 | 5   | YES | chr14 | 106330387 | 106357506 | -8.6562  | 12 | -2.8731 |
| CLL100TD | chr14 | 106330168 | 106345551 | -3.3787 | 5   | YES | chr14 | 106329377 | 106346841 | -9.0224  | 8  | -2.8042 |
| CLL022TD | chr14 | 106330168 | 106345551 | -3.2690 | 5   | NO  |       |           |           |          |    |         |
| CLL276TD | chr14 | 106330168 | 106345551 | -2.8459 | 5   | NO  |       |           |           |          |    |         |
| CLL282TD | chr14 | 106330168 | 106411088 | -2.6317 | 27  | YES | chr14 | 106349710 | 106405971 | -9.7542  | 21 | -3.6324 |
| CLL051TD | chr14 | 106330168 | 106517682 | -0.6045 | 35  | YES | chr14 | 106382639 | 106518370 | -0.6511  | 15 | -2.2766 |
| CLL007TD | chr14 | 106330168 | 106517682 | -2.0845 | 37  | YES | chr14 | 106330387 | 106494494 | -3.3737  | 37 | -3.1163 |
| CLL148TD | chr14 | 106330168 | 106526710 | -0.9501 | 39  | YES | chr14 | 106330760 | 106369421 | -6.0154  | 17 | -2.9558 |
| CLL041TD | chr14 | 106330168 | 106524457 | -0.7176 | 39  | YES | chr14 | 106329987 | 106370493 | -1.7754  | 20 | -2.1101 |
| CLL172TD | chr14 | 106330168 | 106538621 | -2.1448 | 40  | YES | chr14 | 106329377 | 106379028 | -9.7387  | 26 | -2.9754 |
| CLL038TD | chr14 | 106330168 | 106561323 | -1.6025 | 40  | YES | chr14 | 106330760 | 106369421 | -2.6953  | 15 | -2.5613 |
| CLL006TD | chr14 | 106330168 | 106526710 | -1.0101 | 40  | YES | chr14 | 106346841 | 106356996 | -4.5195  | 6  | -2.8648 |
| CLL274TD | chr14 | 106330168 | 106610162 | -1.1555 | 46  | YES | chr14 | 106329377 | 106405971 | -9.7964  | 28 | -3.4616 |
| CLL181TD | chr14 | 106330168 | 106610162 | -0.9352 | 50  | YES | chr14 | 106330387 | 106380172 | -10.0000 | 24 | -3.0424 |
| CLL275TD | chr14 | 106330168 | 106610162 | -0.8714 | 51  | YES | chr14 | 106330760 | 106351843 | -10.0000 | 8  | -2.9762 |
| CLL188TD | chr14 | 106330168 | 106723316 | -0.7276 | 59  | YES | chr14 | 106349710 | 106714578 | -0.9977  | 54 | -2.2479 |
| CLL019TD | chr14 | 106330168 | 106724962 | -1.7993 | 61  | YES | chr14 | 106330387 | 106579220 | -9.5583  | 46 | -3.9811 |
| CLL124TD | chr14 | 106330168 | 106724962 | -0.5153 | 61  | YES | chr14 | 106329377 | 106714578 | -0.7779  | 63 | -1.8724 |
| CLL090TD | chr14 | 106330168 | 106724962 | -1.5966 | 62  | YES | chr14 | 106346841 | 106370309 | -3.8011  | 14 | -2.9557 |
| CLL323TD | chr14 | 106330168 | 106691076 | -0.8079 | 62  | YES | chr14 | 106330760 | 106471216 | -8.5546  | 34 | -3.5535 |
| CLL174TD | chr14 | 106330168 | 106724962 | -2.2069 | 66  | YES | chr14 | 106346841 | 106386891 | -9.9147  | 25 | -3.0002 |
| CLL020TD | chr14 | 106330168 | 106786127 | -0.7892 | 67  | YES | chr14 | 106331373 | 106351843 | -9.4122  | 7  | -2.8086 |
| CLL042TD | chr14 | 106330168 | 106852841 | -0.5597 | 74  | YES | chr14 | 106330760 | 106478072 | -1.5875  | 27 | -3.1102 |
| CLL189TD | chr14 | 106330168 | 106918315 | -1.3986 | 83  | YES | chr14 | 106330387 | 106369421 | -8.2337  | 16 | -2.9375 |
| CLL273TD | chr14 | 106330168 | 106877502 | -0.7216 | 84  | YES | chr14 | 106330387 | 106373023 | -4.3847  | 20 | -2.5511 |
| CLL013TD | chr14 | 106330168 | 106877502 | -0.8658 | 85  | YES | chr14 | 106330760 | 106453023 | -9.2941  | 31 | -3.5583 |
| CLL280TD | chr14 | 106330168 | 107012899 | -2.3117 | 97  | YES | chr14 | 106330387 | 106388010 | -9.9417  | 26 | -3.1735 |
| CLL049TD | chr14 | 106330168 | 106993731 | -0.8750 | 98  | YES | chr14 | 106330760 | 106552646 | -4.2708  | 43 | -3.4485 |
| CLL029TD | chr14 | 106330168 | 107048607 | -1.0459 | 109 | YES | chr14 | 106331581 | 106386891 | -9.9249  | 27 | -2.9546 |
| CLL171TD | chr14 | 106330168 | 107083152 | -0.7604 | 109 | YES | chr14 | 106330387 | 106363769 | -3.8134  | 12 | -2.9225 |
| CLL175TD | chr14 | 106330168 | 107083152 | -2.5047 | 110 | YES | chr14 | 106329377 | 106478456 | -9.7055  | 38 | -3.5220 |
| CLL272TD | chr14 | 106330168 | 107081716 | -0.9841 | 111 | YES | chr14 | 106331581 | 106380172 | -9.9266  | 21 | -2.9896 |
| CLL321TD | chr14 | 106330168 | 107169498 | -0.7248 | 117 | YES | chr14 | 106354362 | 106518770 | -1.4273  | 32 | -1.9369 |
| CLL005TD | chr14 | 106330168 | 107182803 | -0.7506 | 120 | YES | chr14 | 106331373 | 106370309 | -9.2759  | 18 | -3.0124 |
| CLL182TD | chr14 | 106330168 | 107218278 | -0.8158 | 125 | YES | chr14 | 106331373 | 106380172 | -9.8129  | 23 | -2.9438 |
| CLL170TD | chr14 | 106330168 | 107210901 | -0.7360 | 125 | YES | chr14 | 106330760 | 106370309 | -9.9163  | 18 | -3.1611 |
| CLL152TD | chr14 | 106330168 | 107287646 | -0.6983 | 134 | YES | chr14 | 106330760 | 106369421 | -5.9502  | 18 | -2.8870 |
| CLL194TD | chr14 | 106331756 | 106345551 | -4.2298 | 0   | NO  |       |           |           |          |    |         |
| CLL117TD | chr14 | 106331756 | 106345551 | -3.5884 | 0   | YES | chr14 | 106330760 | 106386891 | -8.6995  | 26 | -2.9833 |
| CLL146TD | chr14 | 106331756 | 106345551 | -3.4795 | 0   | NO  |       |           |           |          |    |         |
| CLL063TD | chr14 | 106331756 | 106345551 | -3.8480 | 0   | YES | chr14 | 106330760 | 106360313 | -6.0694  | 12 | -2.8341 |
| CLL082TD | chr14 | 106331756 | 106345551 | -3.3155 | 0   | YES | chr14 | 106330387 | 106816090 | -8.1022  | 71 | -4.2468 |
| CLL054TD | chr14 | 106331756 | 106345551 | -3.7211 | 0   | YES | chr14 | 106330760 | 106351843 | -7.6209  | 7  | -3.0294 |
| CLL166TD | chr14 | 106331756 | 106345551 | -2.2126 | 0   | YES | chr14 | 106330760 | 106380172 | -9.9538  | 24 | -3.0116 |
| CLL270TD | chr14 | 106331756 | 106345551 | -4.5472 | 0   | YES | chr14 | 106331373 | 106370493 | -9.9659  | 16 | -3.0874 |
| CLL030TD | chr14 | 106331756 | 106345551 | -3.1174 | 0   | YES | chr14 | 106331373 | 106376217 | -3.5610  | 18 | -2.7810 |
| CLL319TD | chr14 | 106331756 | 106345551 | -2.6057 | 1   | YES | chr14 | 106331373 | 106361449 | -10.0000 | 12 | -3.0189 |
| CLL155TD | chr14 | 106331756 | 106345551 | -3.7543 | 1   | YES | chr14 | 106330760 | 106360313 | -10.0000 | 13 | -3.0219 |
| CLL044TD | chr14 | 106331756 | 106345551 | -4.4615 | 1   | YES | chr14 | 106330760 | 106369421 | -7.1372  | 17 | -2.9033 |
| CLL267TD | chr14 | 106331756 | 106345551 | -2.5360 | 1   | YES | chr14 | 106330387 | 106357506 | -4.1548  | 12 | -2.6611 |
| CLL168TD | chr14 | 106331756 | 106481450 | -0.6559 | 33  | NO  |       |           |           |          |    |         |
| CLL136TD | chr14 | 106331756 | 106826216 | -1.8593 | 66  | YES | chr14 | 106330387 | 106357506 | -4.4873  | 8  | -2.6532 |
| CLL194TD | chr14 | 106354195 | 106453838 | -0.6072 | 18  | YES | chr14 | 106349710 | 106366443 | -7.1575  | 8  | -3.2879 |
| CLL141TD | chr14 | 106354195 | 106398480 | -1.1591 | 19  | YES | chr14 | 106329987 | 106375713 | -9.9491  | 20 | -3.1210 |
| CLL319TD | chr14 | 106354195 | 106405903 | -0.4703 | 21  | YES | chr14 | 106331373 | 106361449 | -10.0000 | 12 | -3.0189 |
| CLL117TD | chr14 | 106354195 | 106398480 | -1.2201 | 21  | YES | chr14 | 106330760 | 106386891 | -8.6995  | 26 | -2.9833 |
| CLL155TD | chr14 | 106354195 | 106411088 | -0.5768 | 21  | YES | chr14 | 106330760 | 106360313 | -10.0000 | 13 | -3.0219 |
| CLL054TD | chr14 | 106354195 | 106411088 | -0.5840 | 23  | YES | chr14 | 106354362 | 106405971 | -1.2861  | 23 | -1.9737 |
| CLL277TD | chr14 | 106354195 | 106410678 | -0.9011 | 23  | YES | chr14 | 106329987 | 106378065 | -9.7456  | 25 | -2.9875 |
| CLL018TD | chr14 | 106354195 | 106453838 | -0.6492 | 23  | NO  |       |           |           |          |    |         |
| CLL082TD | chr14 | 106354195 | 106481450 | -1.1005 | 27  | YES | chr14 | 106330387 | 106816090 | -8.1022  | 71 | -4.2468 |
| CLL032TD | chr14 | 106354195 | 106516175 | -0.6502 | 28  | YES | chr14 | 106330387 | 106379028 | -6.9021  | 21 | -2.9824 |

|          |       |           |           |         |      |     |       |           |           |         |      |         |
|----------|-------|-----------|-----------|---------|------|-----|-------|-----------|-----------|---------|------|---------|
| CLL146TD | chr14 | 106354195 | 106517682 | -0.5970 | 28   | YES | chr14 | 106346841 | 106357506 | -9.1811 | 7    | -3.0148 |
| CLL276TD | chr14 | 106370629 | 106453838 | -0.4948 | 13   | NO  |       |           |           |         |      |         |
| CLL100TD | chr14 | 106483522 | 106786127 | -2.4305 | 35   | YES | chr14 | 106368457 | 106780862 | -4.2407 | 57   | -4.3246 |
| CLL117TD | chr14 | 106485479 | 106497345 | -3.6183 | 2    | YES | chr14 | 106388010 | 106539432 | -4.9691 | 15   | -5.3148 |
| CLL082TD | chr14 | 106485479 | 106498648 | -4.1903 | 2    | YES | chr14 | 106330387 | 106816090 | -8.1022 | 71   | -4.2468 |
| CLL141TD | chr14 | 106485479 | 106979576 | -3.0341 | 62   | YES | chr14 | 106376217 | 107042562 | -7.7008 | 84   | -5.1246 |
| CLL007TD | chr14 | 106519396 | 106724962 | -0.6403 | 23   | YES | chr14 | 106518370 | 106714578 | -0.5846 | 25   | -1.6552 |
| CLL266TD | chr14 | 106531357 | 106552225 | -2.3623 | 2    | NO  |       |           |           |         |      |         |
| CLL053TD | chr14 | 106531357 | 106552225 | -2.3849 | 2    | NO  |       |           |           |         |      |         |
| CLL044TD | chr14 | 106531357 | 106552225 | -2.2968 | 2    | NO  |       |           |           |         |      |         |
| CLL083TD | chr14 | 106531357 | 106554165 | -2.1660 | 4    | NO  |       |           |           |         |      |         |
| CLL172TD | chr14 | 106540426 | 106561323 | -0.7022 | 2    | NO  |       |           |           |         |      |         |
| CLL006TD | chr14 | 106601912 | 106691076 | -0.8057 | 10   | YES | chr14 | 106373023 | 106667950 | -0.7320 | 41   | -1.9870 |
| CLL038TD | chr14 | 106632143 | 106779188 | -0.5882 | 15   | YES | chr14 | 106586106 | 106791373 | -0.6606 | 25   | -1.9891 |
| CLL082TD | chr14 | 106636501 | 106697473 | -2.5987 | 8    | YES | chr14 | 106330387 | 106816090 | -8.1022 | 71   | -4.2468 |
| CLL082TD | chr14 | 106712288 | 106723316 | -3.7927 | 1    | YES | chr14 | 106330387 | 106816090 | -8.1022 | 71   | -4.2468 |
| CLL090TD | chr14 | 106726871 | 106829408 | -0.5597 | 11   | YES | chr14 | 106725171 | 106805561 | -0.9174 | 12   | -1.6604 |
| CLL174TD | chr14 | 106726871 | 107012899 | -0.7352 | 35   | YES | chr14 | 106733114 | 107034699 | -0.9403 | 38   | -2.8728 |
| CLL082TD | chr14 | 106785737 | 106826216 | -4.4127 | 6    | YES | chr14 | 106330387 | 106816090 | -8.1022 | 71   | -4.2468 |
| CLL100TD | chr14 | 106825816 | 107150851 | -0.7333 | 43   | YES | chr14 | 106790974 | 107169901 | -0.9732 | 48   | -3.0571 |
| CLL136TD | chr14 | 106829008 | 107041398 | -0.7250 | 28   | YES | chr14 | 106829563 | 107034699 | -0.9639 | 27   | -3.6669 |
| CLL082TD | chr14 | 106833210 | 106877502 | -0.7007 | 7    | YES | chr14 | 106829563 | 106866773 | -1.1196 | 9    | -3.5838 |
| CLL173TD | chr14 | 106835238 | 107060144 | -0.5668 | 29   | YES | chr14 | 106829563 | 107042562 | -1.0421 | 29   | -3.4730 |
| CLL189TD | chr14 | 106927167 | 107169498 | -0.3894 | 30   | YES | chr14 | 106926160 | 107013314 | -0.4216 | 15   | -2.6262 |
| CLL141TD | chr14 | 107010741 | 107044950 | -3.1320 | 5    | YES | chr14 | 106376217 | 107042562 | -7.7008 | 84   | -5.1246 |
| CLL280TD | chr14 | 107013844 | 107081716 | -0.8741 | 9    | YES | chr14 | 107012911 | 107283143 | -0.3559 | 31   | -1.6800 |
| CLL141TD | chr14 | 107046530 | 107128311 | -1.0109 | 12   | YES | chr14 | 107048641 | 107283143 | -1.1519 | 27   | -2.0172 |
| CLL172TD | chr14 | 107050074 | 107083152 | -0.7786 | 4    | YES | chr14 | 107048641 | 107083225 | -0.8724 | 7    | -3.0084 |
| CLL175TD | chr14 | 107086213 | 107128311 | -0.8322 | 4    | NO  |       |           |           |         |      |         |
| CLL053TD | chr14 | 107137818 | 107169498 | -0.6778 | 0    | NO  |       |           |           |         |      |         |
| CLL141TD | chr14 | 107137818 | 107147214 | -5.1626 | 0    | YES | chr14 | 107048641 | 107283143 | -1.1519 | 27   | -2.0172 |
| CLL044TD | chr14 | 107151892 | 107169498 | -1.4230 | 0    | YES | chr14 | 106573203 | 107178794 | -0.8343 | 79   | -2.1425 |
| CLL083TD | chr14 | 107159767 | 107181281 | -1.4358 | 4    | YES | chr14 | 107113711 | 107283143 | -0.8322 | 17   | -2.9388 |
| CLL100TD | chr14 | 107240610 | 107287646 | -0.6596 | 2    | NO  |       |           |           |         |      |         |
| CLL141TD | chr15 | 34202339  | 37462956  | -0.5534 | 158  | YES | chr15 | 34295201  | 35376969  | -0.9415 | 120  | -3.8542 |
| CLL141TD | chr15 | 40253746  | 41576166  | -1.0220 | 310  | YES | chr15 | 40253922  | 41571500  | -1.0610 | 310  | -3.5989 |
| CLL279TD | chr15 | 40530636  | 40678892  | 0.2926  | 59   | NO  |       |           |           |         |      |         |
| CLL192TD | chr15 | 42110484  | 42187101  | 0.2769  | 101  | NO  |       |           |           |         |      |         |
| CLL100TD | chr15 | 50651053  | 51058342  | -0.9131 | 83   | YES | chr15 | 50731262  | 51204250  | -0.8320 | 84   | -3.5269 |
| CLL117TD | chr15 | 51781915  | 51791893  | 0.7697  | 2    | NO  |       |           |           |         |      |         |
| CLL141TD | chr15 | 56332487  | 56599346  | -0.9313 | 9    | YES | chr15 | 56385501  | 56436579  | -1.0077 | 8    | -7.3797 |
| CLL175TD | chr15 | 65368825  | 65478380  | -0.8670 | 20   | YES | chr15 | 65410996  | 65471184  | -0.9515 | 19   | -4.4094 |
| CLL279TD | chr15 | 74460995  | 74737733  | 0.3025  | 63   | NO  |       |           |           |         |      |         |
| CLL145TD | chr16 | 49962692  | 50875648  | -0.7276 | 107  | YES | chr16 | 50059526  | 51098366  | -0.7230 | 108  | -3.0494 |
| CLL192TD | chr17 | 72804     | 18537304  | -0.6050 | 3102 | YES | chr17 | 5967      | 2584999   | -1.2569 | 376  | -3.2789 |
| CLL145TD | chr17 | 4579986   | 4912490   | -0.6841 | 188  | YES | chr17 | 4585772   | 4910709   | -0.7493 | 187  | -2.6673 |
| CLL145TD | chr17 | 7186117   | 7258392   | -0.6833 | 76   | YES | chr17 | 7186501   | 7256220   | -0.8010 | 76   | -2.5775 |
| CLL192TD | chr17 | 18752453  | 22028853  | 0.4425  | 292  | YES | chr17 | 19400745  | 21821981  | 0.4045  | 212  | 2.5914  |
| CLL048TD | chr17 | 42214792  | 42531465  | -0.3634 | 116  | NO  |       |           |           |         |      |         |
| CLL023TD | chr17 | 44165526  | 81027191  | 0.3915  | 4296 | YES | chr17 | 44336902  | 45699089  | 0.5388  | 135  | 3.4832  |
| CLL022TD | chr18 | 14116     | 14978275  | -0.8543 | 826  | YES | chr18 | 47434     | 3277211   | -0.8853 | 235  | -4.0345 |
| CLL027TD | chr18 | 485853    | 542045    | -0.5756 | 0    | NO  |       |           |           |         |      |         |
| CLL027TD | chr18 | 47072311  | 47143476  | -0.6025 | 10   | NO  |       |           |           |         |      |         |
| CLL100TD | chr18 | 68818906  | 78015254  | -0.8682 | 218  | YES | chr18 | 67872788  | 78005155  | -1.0679 | 220  | -3.6304 |
| CLL152TD | chr18 | 77981438  | 78015254  | -0.8789 | 1    | NO  |       |           |           |         |      |         |
| CLL027TD | chr18 | 77983285  | 78015254  | -0.8006 | 1    | NO  |       |           |           |         |      |         |
| CLL290TD | chr18 | 77987347  | 78015254  | -0.6080 | 1    | NO  |       |           |           |         |      |         |
| CLL124TD | chr19 | 644208    | 653049    | -0.9377 | 1    | NO  |       |           |           |         |      |         |
| CLL279TD | chr19 | 22691038  | 22700504  | 0.6273  | 0    | NO  |       |           |           |         |      |         |
| CLL191TD | chr19 | 37294161  | 37493102  | -0.9718 | 19   | YES | chr19 | 37309275  | 37487180  | -1.1080 | 19   | -4.6655 |
| CLL275TD | chr19 | 42216080  | 42257386  | 0.4840  | 7    | NO  |       |           |           |         |      |         |
| CLL043TD | chr19 | 51882938  | 59097086  | 0.4277  | 1235 | YES | chr19 | 51883675  | 52364144  | 0.3666  | 71   | 2.6405  |
| CLL152TD | chr19 | 59069004  | 59097086  | -0.7228 | 6    | NO  |       |           |           |         |      |         |
| CLL023TD | chr2  | 16819     | 48155     | -0.5747 | 1    | NO  |       |           |           |         |      |         |
| CLL152TD | chr2  | 16819     | 54684     | -0.8368 | 2    | NO  |       |           |           |         |      |         |
| CLL100TD | chr2  | 16819     | 55994     | -0.7164 | 2    | NO  |       |           |           |         |      |         |
| CLL027TD | chr2  | 16819     | 48155     | -0.8119 | 2    | NO  |       |           |           |         |      |         |
| CLL017TD | chr2  | 16819     | 30432982  | 0.5429  | 1891 | YES | chr2  | 41527     | 30381476  | 0.5549  | 1891 | 3.8323  |
| CLL008TD | chr2  | 16819     | 89160333  | 0.4635  | 5257 | YES | chr2  | 41527     | 89160356  | 0.4833  | 5258 | 3.2568  |
| CLL020TD | chr2  | 16819     | 89126843  | 0.5388  | 5306 | YES | chr2  | 41527     | 89102306  | 0.5442  | 5306 | 3.6805  |
| CLL022TD | chr2  | 50461     | 89160333  | 0.4951  | 5272 | YES | chr2  | 41527     | 25061688  | 0.5351  | 1033 | 3.5597  |
| CLL017TD | chr2  | 52017346  | 66917238  | 0.3384  | 752  | YES | chr2  | 50883447  | 66798339  | 0.3224  | 765  | 2.3601  |
| CLL166TD | chr2  | 89126443  | 89480685  | -0.5831 | 39   | YES | chr2  | 89156854  | 89544238  | -1.1298 | 44   | -3.4770 |

|          |      |          |          |         |    |     |      |          |          |         |    |         |
|----------|------|----------|----------|---------|----|-----|------|----------|----------|---------|----|---------|
| CLL159TD | chr2 | 89129332 | 89156875 | -0.7316 | 0  | NO  |      |          |          |         |    |         |
| CLL006TD | chr2 | 89129332 | 89158640 | -0.9009 | 1  | NO  |      |          |          |         |    |         |
| CLL052TD | chr2 | 89129332 | 89160333 | -0.5147 | 2  | NO  |      |          |          |         |    |         |
| CLL041TD | chr2 | 89129332 | 89160333 | -0.5989 | 2  | NO  |      |          |          |         |    |         |
| CLL005TD | chr2 | 89129332 | 89480685 | -0.7712 | 40 | YES | chr2 | 89160356 | 89290378 | -0.9660 | 15 | -4.2719 |
| CLL029TD | chr2 | 89132766 | 89141808 | -5.2084 | 0  | NO  |      |          |          |         |    |         |
| CLL182TD | chr2 | 89132766 | 89141808 | -4.7602 | 0  | NO  |      |          |          |         |    |         |
| CLL082TD | chr2 | 89132766 | 89156875 | -0.8236 | 0  | NO  |      |          |          |         |    |         |
| CLL178TD | chr2 | 89132766 | 89141808 | -4.7301 | 0  | NO  |      |          |          |         |    |         |
| CLL090TD | chr2 | 89132766 | 89158640 | -2.1664 | 1  | YES | chr2 | 89156854 | 89320097 | -0.9598 | 25 | -3.6516 |
| CLL173TD | chr2 | 89132766 | 89158640 | -2.9058 | 1  | YES | chr2 | 89156854 | 89161356 | -2.5486 | 6  | -5.9544 |
| CLL020TD | chr2 | 89132766 | 89158640 | -0.9047 | 1  | NO  |      |          |          |         |    |         |
| CLL045TD | chr2 | 89132766 | 89158640 | -2.4828 | 1  | NO  |      |          |          |         |    |         |
| CLL051TD | chr2 | 89132766 | 89158640 | -0.7133 | 1  | NO  |      |          |          |         |    |         |
| CLL148TD | chr2 | 89132766 | 89158640 | -3.2332 | 1  | NO  |      |          |          |         |    |         |
| CLL019TD | chr2 | 89132766 | 89158640 | -2.7531 | 1  | NO  |      |          |          |         |    |         |
| CLL027TD | chr2 | 89132766 | 89158640 | -0.8243 | 1  | NO  |      |          |          |         |    |         |
| CLL171TD | chr2 | 89132766 | 89158640 | -0.7974 | 1  | NO  |      |          |          |         |    |         |
| CLL157TD | chr2 | 89132766 | 89158640 | -0.9371 | 1  | NO  |      |          |          |         |    |         |
| CLL174TD | chr2 | 89132766 | 89158640 | -0.8230 | 1  | YES | chr2 | 89156854 | 89161356 | -1.1072 | 6  | -3.2831 |
| CLL023TD | chr2 | 89132766 | 89160333 | -0.8755 | 2  | YES | chr2 | 89156854 | 89161356 | -1.1652 | 6  | -3.5646 |
| CLL189TD | chr2 | 89132766 | 89160333 | -1.5694 | 2  | YES | chr2 | 89156854 | 90249067 | -0.9460 | 77 | -3.3042 |
| CLL064TD | chr2 | 89132766 | 89160333 | -3.3915 | 2  | NO  |      |          |          |         |    |         |
| CLL272TD | chr2 | 89132766 | 89160333 | -3.9312 | 2  | YES | chr2 | 89156854 | 89196972 | -3.6236 | 10 | -6.1602 |
| CLL038TD | chr2 | 89132766 | 89160333 | -0.4787 | 2  | NO  |      |          |          |         |    |         |
| CLL184TD | chr2 | 89132766 | 89160333 | -0.6856 | 2  | NO  |      |          |          |         |    |         |
| CLL276TD | chr2 | 89132766 | 89241426 | -2.6169 | 10 | NO  |      |          |          |         |    |         |
| CLL168TD | chr2 | 89132766 | 89276358 | -1.9190 | 14 | YES | chr2 | 89156854 | 89196972 | -5.0728 | 10 | -7.0221 |
| CLL009TD | chr2 | 89132766 | 89276358 | -2.8620 | 14 | YES | chr2 | 89156854 | 89290378 | -3.2773 | 17 | -7.0406 |
| CLL277TD | chr2 | 89132766 | 89276358 | -0.8001 | 14 | YES | chr2 | 89161356 | 89293214 | -0.9857 | 16 | -3.5029 |
| CLL152TD | chr2 | 89132766 | 89312731 | -0.7458 | 23 | YES | chr2 | 89160995 | 89385101 | -0.8927 | 27 | -2.9719 |
| CLL280TD | chr2 | 89132766 | 89312731 | -2.7372 | 23 | YES | chr2 | 89161356 | 89327096 | -8.2141 | 22 | -7.1460 |
| CLL270TD | chr2 | 89132766 | 89312731 | -0.8242 | 23 | YES | chr2 | 89160995 | 89327096 | -1.1610 | 23 | -3.8059 |
| CLL275TD | chr2 | 89132766 | 89312731 | -0.7727 | 23 | YES | chr2 | 89161356 | 89320097 | -0.9910 | 20 | -3.6162 |
| CLL146TD | chr2 | 89132766 | 89312731 | -0.6997 | 23 | YES | chr2 | 89185051 | 89320097 | -0.7593 | 19 | -3.4230 |
| CLL048TD | chr2 | 89132766 | 89441299 | -0.7572 | 33 | YES | chr2 | 89156854 | 89417220 | -1.0894 | 33 | -3.4909 |
| CLL100TD | chr2 | 89132766 | 89450569 | -2.3855 | 35 | YES | chr2 | 89160356 | 89475786 | -4.1794 | 36 | -6.4438 |
| CLL170TD | chr2 | 89132766 | 89488503 | -0.7020 | 38 | YES | chr2 | 89156854 | 89512875 | -0.9394 | 39 | -3.3298 |
| CLL191TD | chr2 | 89132766 | 89475572 | -0.7996 | 38 | YES | chr2 | 89161356 | 89459703 | -1.0099 | 33 | -3.2878 |
| CLL194TD | chr2 | 89132766 | 89508208 | -2.5227 | 39 | YES | chr2 | 89160691 | 89513294 | -5.9925 | 38 | -6.6104 |
| CLL278TD | chr2 | 89132766 | 89508208 | -1.9548 | 39 | YES | chr2 | 89156854 | 89327096 | -4.2794 | 27 | -6.8116 |
| CLL136TD | chr2 | 89132766 | 90265260 | -0.5676 | 83 | YES | chr2 | 89160995 | 89513294 | -0.9438 | 37 | -3.1657 |
| CLL029TD | chr2 | 89145568 | 89156875 | -4.8194 | 0  | NO  |      |          |          |         |    |         |
| CLL178TD | chr2 | 89147191 | 89156875 | -4.7350 | 0  | NO  |      |          |          |         |    |         |
| CLL182TD | chr2 | 89147191 | 89160333 | -4.3593 | 2  | NO  |      |          |          |         |    |         |
| CLL159TD | chr2 | 89158240 | 89539015 | -1.7080 | 42 | YES | chr2 | 89160995 | 89534308 | -4.4536 | 39 | -6.3688 |
| CLL082TD | chr2 | 89158240 | 90226606 | -1.7380 | 72 | YES | chr2 | 89160691 | 89568144 | -8.8327 | 43 | -6.4135 |
| CLL013TD | chr2 | 89159933 | 89234800 | -0.9188 | 9  | YES | chr2 | 89160038 | 89196972 | -0.9390 | 9  | -2.9641 |
| CLL171TD | chr2 | 89159933 | 89203473 | -2.9553 | 9  | YES | chr2 | 89160038 | 89290378 | -4.2233 | 16 | -7.4763 |
| CLL186TD | chr2 | 89159933 | 89276358 | -0.8164 | 13 | YES | chr2 | 89160038 | 89309446 | -1.0574 | 21 | -3.6263 |
| CLL090TD | chr2 | 89159933 | 89312731 | -0.5271 | 22 | YES | chr2 | 89156854 | 89320097 | -0.9598 | 25 | -3.6516 |
| CLL032TD | chr2 | 89159933 | 89312731 | -0.7068 | 22 | YES | chr2 | 89160038 | 89399739 | -0.9336 | 31 | -3.1934 |
| CLL321TD | chr2 | 89159933 | 89441299 | -0.7253 | 32 | YES | chr2 | 89160356 | 89319463 | -0.9034 | 21 | -3.5256 |
| CLL273TD | chr2 | 89159933 | 89508208 | -0.7447 | 38 | YES | chr2 | 89161356 | 89512875 | -1.0439 | 35 | -2.7556 |
| CLL266TD | chr2 | 89159933 | 89539015 | -0.6806 | 42 | YES | chr2 | 89160038 | 89544964 | -0.7795 | 44 | -2.7875 |
| CLL272TD | chr2 | 89163662 | 89185502 | -0.6032 | 1  | YES | chr2 | 89156854 | 89196972 | -3.6236 | 10 | -6.1602 |
| CLL178TD | chr2 | 89163662 | 89186090 | -4.2350 | 2  | YES | chr2 | 89160691 | 89568144 | -9.5138 | 43 | -6.4361 |
| CLL322TD | chr2 | 89163662 | 89203473 | -3.1443 | 4  | YES | chr2 | 89161356 | 89247203 | -6.4075 | 7  | -7.8980 |
| CLL020TD | chr2 | 89163662 | 89241426 | -3.6293 | 4  | YES | chr2 | 89160995 | 89196972 | -6.9250 | 6  | -7.4900 |
| CLL052TD | chr2 | 89163662 | 89232525 | -1.9294 | 4  | YES | chr2 | 89160691 | 89513294 | -2.2623 | 39 | -5.1414 |
| CLL083TD | chr2 | 89163662 | 89203473 | -3.4564 | 4  | YES | chr2 | 89160995 | 89533640 | -5.1079 | 38 | -6.3510 |
| CLL175TD | chr2 | 89163662 | 89234800 | -0.7846 | 4  | YES | chr2 | 89160038 | 89246786 | -0.9414 | 10 | -3.6095 |
| CLL023TD | chr2 | 89163662 | 89214260 | -3.2341 | 4  | NO  |      |          |          |         |    |         |
| CLL279TD | chr2 | 89163662 | 89241426 | -0.7602 | 4  | YES | chr2 | 89160995 | 89196972 | -0.6769 | 6  | -3.0212 |
| CLL006TD | chr2 | 89163662 | 89203473 | -4.0448 | 4  | YES | chr2 | 89160995 | 89544964 | -5.2305 | 41 | -6.2867 |
| CLL157TD | chr2 | 89163662 | 89203473 | -3.8841 | 4  | YES | chr2 | 89161356 | 89385101 | -8.3899 | 26 | -6.6945 |
| CLL184TD | chr2 | 89163662 | 89244018 | -2.6475 | 4  | YES | chr2 | 89160356 | 89196972 | -4.7055 | 8  | -7.1251 |
| CLL124TD | chr2 | 89163662 | 89276358 | -0.7008 | 8  | YES | chr2 | 89160356 | 89290378 | -0.9793 | 15 | -3.8947 |
| CLL038TD | chr2 | 89163662 | 89276358 | -1.8013 | 8  | YES | chr2 | 89160995 | 89309446 | -2.2245 | 18 | -6.0223 |
| CLL192TD | chr2 | 89163662 | 89276358 | -0.6073 | 8  | YES | chr2 | 89160356 | 89292312 | -0.7631 | 17 | -3.7334 |
| CLL323TD | chr2 | 89163662 | 89276358 | -0.6652 | 8  | YES | chr2 | 89161356 | 89290378 | -0.8738 | 12 | -3.6078 |
| CLL145TD | chr2 | 89163662 | 89312731 | -0.6859 | 16 | YES | chr2 | 89160038 | 89309863 | -0.8463 | 21 | -3.1907 |
| CLL022TD | chr2 | 89163662 | 89312731 | -0.6908 | 17 | YES | chr2 | 89160995 | 89320097 | -0.9468 | 21 | -3.1892 |

|          |      |          |          |         |    |     |      |          |          |         |    |         |
|----------|------|----------|----------|---------|----|-----|------|----------|----------|---------|----|---------|
| CLL188TD | chr2 | 89163662 | 89312731 | -0.8007 | 17 | YES | chr2 | 89161356 | 89399319 | -0.8845 | 26 | -3.0600 |
| CLL049TD | chr2 | 89163662 | 89312731 | -2.3126 | 17 | YES | chr2 | 89161356 | 89399739 | -3.5881 | 28 | -6.0743 |
| CLL054TD | chr2 | 89163662 | 89312731 | -0.7494 | 17 | YES | chr2 | 89160995 | 89345875 | -0.9161 | 26 | -3.1440 |
| CLL008TD | chr2 | 89163662 | 89312731 | -0.6907 | 17 | YES | chr2 | 89160691 | 89975667 | -0.6300 | 47 | -2.3127 |
| CLL027TD | chr2 | 89163662 | 89312731 | -2.9040 | 17 | YES | chr2 | 89161356 | 89544964 | -5.0820 | 40 | -6.2860 |
| CLL282TD | chr2 | 89163662 | 89312731 | -3.4583 | 17 | YES | chr2 | 89160691 | 89417220 | -7.7098 | 32 | -6.4613 |
| CLL017TD | chr2 | 89163662 | 89430043 | -2.9179 | 27 | YES | chr2 | 89161356 | 89544964 | -5.9335 | 40 | -6.4746 |
| CLL172TD | chr2 | 89163662 | 89441299 | -0.7525 | 27 | YES | chr2 | 89160691 | 89442506 | -0.7657 | 32 | -3.0839 |
| CLL042TD | chr2 | 89163662 | 89430043 | -1.3733 | 28 | YES | chr2 | 89160356 | 89417220 | -1.9590 | 32 | -5.2045 |
| CLL051TD | chr2 | 89163662 | 89430043 | -2.3841 | 28 | YES | chr2 | 89160691 | 89417220 | -3.3980 | 31 | -5.8378 |
| CLL007TD | chr2 | 89163662 | 89430043 | -0.7962 | 28 | YES | chr2 | 89160356 | 89534308 | -0.8856 | 41 | -3.0161 |
| CLL053TD | chr2 | 89163662 | 89430043 | -0.7718 | 28 | YES | chr2 | 89160995 | 89417220 | -1.0671 | 30 | -3.1783 |
| CLL041TD | chr2 | 89163662 | 89450569 | -1.6698 | 30 | YES | chr2 | 89160356 | 89513294 | -2.1924 | 39 | -5.1665 |
| CLL174TD | chr2 | 89163662 | 89450569 | -2.3986 | 30 | YES | chr2 | 89185051 | 89327096 | -5.9416 | 21 | -7.0279 |
| CLL144TD | chr2 | 89163662 | 89487166 | -0.7306 | 31 | YES | chr2 | 89160356 | 89533640 | -0.9031 | 38 | -3.5036 |
| CLL141TD | chr2 | 89163662 | 89450569 | -0.8406 | 31 | YES | chr2 | 89160995 | 89568144 | -0.9846 | 44 | -3.0220 |
| CLL197TD | chr2 | 89163662 | 89534288 | -0.6896 | 36 | YES | chr2 | 89160995 | 89534308 | -0.7321 | 39 | -2.9673 |
| CLL290TD | chr2 | 89163662 | 89534288 | -0.6866 | 36 | YES | chr2 | 89185051 | 89533640 | -0.8235 | 36 | -3.0235 |
| CLL181TD | chr2 | 89163662 | 89539015 | -0.7093 | 36 | YES | chr2 | 89161356 | 89544238 | -0.8486 | 38 | -3.0251 |
| CLL267TD | chr2 | 89163662 | 89539015 | -0.6202 | 37 | YES | chr2 | 89160691 | 89544964 | -0.8717 | 42 | -2.8987 |
| CLL155TD | chr2 | 89163662 | 89596790 | -0.6940 | 40 | YES | chr2 | 89161356 | 89568144 | -1.2157 | 41 | -3.5311 |
| CLL117TD | chr2 | 89163662 | 89602064 | -0.6157 | 41 | YES | chr2 | 89160356 | 89568144 | -0.9329 | 45 | -3.0710 |
| CLL063TD | chr2 | 89163662 | 89617070 | -0.6622 | 41 | YES | chr2 | 89160691 | 89533640 | -0.7950 | 39 | -3.0358 |
| CLL043TD | chr2 | 89167033 | 89241426 | -0.6358 | 4  | NO  |      |          |          |         |    |         |
| CLL040TD | chr2 | 89167033 | 89312731 | -0.2702 | 16 | YES | chr2 | 89160995 | 89345875 | -0.7401 | 24 | -2.7909 |
| CLL274TD | chr2 | 89185102 | 89196925 | -0.7634 | 3  | YES | chr2 | 89160356 | 89196972 | -0.8589 | 8  | -2.5221 |
| CLL029TD | chr2 | 89185690 | 89196925 | -4.0093 | 2  | YES | chr2 | 89160356 | 89196972 | -2.9727 | 8  | -5.7343 |
| CLL018TD | chr2 | 89185690 | 89196925 | -0.8194 | 2  | NO  |      |          |          |         |    |         |
| CLL039TD | chr2 | 89185690 | 89196925 | -0.6426 | 2  | NO  |      |          |          |         |    |         |
| CLL030TD | chr2 | 89185690 | 89196925 | -0.6861 | 2  | NO  |      |          |          |         |    |         |
| CLL029TD | chr2 | 89198090 | 89430043 | -0.7328 | 23 | YES | chr2 | 89246786 | 89544964 | -0.7752 | 34 | -2.5370 |
| CLL272TD | chr2 | 89199456 | 89508208 | -0.9253 | 28 | YES | chr2 | 89246786 | 89513294 | -1.1561 | 30 | -3.7656 |
| CLL023TD | chr2 | 89216786 | 89480685 | -0.6437 | 28 | YES | chr2 | 89246786 | 89544964 | -1.1567 | 34 | -3.4086 |
| CLL157TD | chr2 | 89226231 | 89232525 | -4.9603 | 0  | YES | chr2 | 89161356 | 89385101 | -8.3899 | 26 | -6.6945 |
| CLL322TD | chr2 | 89234400 | 89255624 | -1.1290 | 2  | YES | chr2 | 89161356 | 89247203 | -6.4075 | 7  | -7.8980 |
| CLL178TD | chr2 | 89234400 | 89255624 | -1.8923 | 2  | YES | chr2 | 89160691 | 89568144 | -9.5138 | 43 | -6.4361 |
| CLL171TD | chr2 | 89234400 | 89270536 | -1.3903 | 4  | YES | chr2 | 89160038 | 89290378 | -4.2233 | 16 | -7.4763 |
| CLL020TD | chr2 | 89243618 | 89312731 | -0.7356 | 13 | YES | chr2 | 89246786 | 89544964 | -0.8032 | 35 | -2.5707 |
| CLL276TD | chr2 | 89243618 | 89312731 | -0.5947 | 13 | YES | chr2 | 89246786 | 89345454 | -1.1372 | 19 | -3.2373 |
| CLL184TD | chr2 | 89247673 | 89508208 | -0.7063 | 27 | YES | chr2 | 89246786 | 89986315 | -0.9825 | 40 | -2.7978 |
| CLL322TD | chr2 | 89266299 | 89508208 | -0.4556 | 24 | YES | chr2 | 89265748 | 89513294 | -0.7624 | 28 | -2.7642 |
| CLL168TD | chr2 | 89312331 | 90265260 | -0.2797 | 59 | YES | chr2 | 89277955 | 89475786 | -0.7927 | 26 | -2.2758 |
| CLL052TD | chr2 | 89427165 | 89508208 | -0.8408 | 5  | YES | chr2 | 89160691 | 89513294 | -2.2623 | 39 | -5.1414 |
| CLL027TD | chr2 | 89427165 | 89596790 | -0.9703 | 13 | YES | chr2 | 89161356 | 89544964 | -5.0820 | 40 | -6.2860 |
| CLL022TD | chr2 | 89427165 | 90253749 | 0.6324  | 43 | YES | chr2 | 89326635 | 90414113 | 0.6507  | 58 | 2.8512  |
| CLL049TD | chr2 | 89427166 | 90093173 | -0.2987 | 26 | YES | chr2 | 89416800 | 89952847 | -0.6986 | 16 | -2.0256 |
| CLL157TD | chr2 | 89427166 | 90093173 | -0.4054 | 26 | YES | chr2 | 89399319 | 89568144 | -1.3725 | 17 | -2.7942 |
| CLL051TD | chr2 | 89440899 | 89456979 | -0.6971 | 2  | NO  |      |          |          |         |    |         |
| CLL017TD | chr2 | 89440899 | 89534288 | -0.9678 | 9  | YES | chr2 | 89161356 | 89544964 | -5.9335 | 40 | -6.4746 |
| CLL083TD | chr2 | 89440899 | 89598774 | -1.0350 | 13 | YES | chr2 | 89160995 | 89533640 | -5.1079 | 38 | -6.3510 |
| CLL006TD | chr2 | 89441648 | 90105711 | -1.1940 | 25 | YES | chr2 | 89160995 | 89544964 | -5.2305 | 41 | -6.2867 |
| CLL182TD | chr2 | 89450314 | 89508208 | -0.4770 | 3  | YES | chr2 | 89160691 | 89513294 | -0.9851 | 39 | -3.3092 |
| CLL100TD | chr2 | 89450569 | 89508208 | -1.0351 | 3  | YES | chr2 | 89160356 | 89475786 | -4.1794 | 36 | -6.4438 |
| CLL174TD | chr2 | 89450569 | 89508208 | -1.0538 | 3  | YES | chr2 | 89399319 | 89475786 | -7.3360 | 9  | -6.3936 |
| CLL041TD | chr2 | 89450569 | 89534288 | -0.7081 | 6  | YES | chr2 | 89160356 | 89513294 | -2.1924 | 39 | -5.1665 |
| CLL279TD | chr2 | 89456579 | 89539015 | -0.6307 | 7  | NO  |      |          |          |         |    |         |
| CLL005TD | chr2 | 89485104 | 90106037 | -0.2521 | 22 | YES | chr2 | 89385101 | 89568144 | -0.9056 | 18 | -2.5695 |
| CLL194TD | chr2 | 89533889 | 90093173 | -0.6219 | 17 | YES | chr2 | 89533640 | 89568144 | -0.7773 | 6  | -2.3608 |
| CLL008TD | chr2 | 89533889 | 91815879 | 0.2988  | 51 | YES | chr2 | 89976153 | 91963931 | 0.4251  | 66 | 1.6177  |
| CLL159TD | chr2 | 89596391 | 90093173 | -0.4502 | 13 | NO  |      |          |          |         |    |         |
| CLL178TD | chr2 | 89596391 | 90093173 | -0.7364 | 13 | NO  |      |          |          |         |    |         |
| CLL083TD | chr2 | 89601665 | 90093173 | -0.3850 | 13 | NO  |      |          |          |         |    |         |
| CLL275TD | chr2 | 89987440 | 90032877 | -0.6127 | 2  | NO  |      |          |          |         |    |         |
| CLL173TD | chr2 | 89987440 | 90045019 | -0.7312 | 3  | NO  |      |          |          |         |    |         |
| CLL017TD | chr2 | 89987440 | 90093173 | -0.5027 | 7  | NO  |      |          |          |         |    |         |
| CLL174TD | chr2 | 89987440 | 90093173 | -0.4979 | 7  | NO  |      |          |          |         |    |         |
| CLL278TD | chr2 | 90012137 | 90265260 | -0.5540 | 29 | YES | chr2 | 90192914 | 90261664 | -1.2169 | 17 | -2.3904 |
| CLL052TD | chr2 | 90013183 | 90093173 | -0.4301 | 5  | NO  |      |          |          |         |    |         |
| CLL100TD | chr2 | 90013183 | 90093173 | -0.4963 | 5  | NO  |      |          |          |         |    |         |
| CLL041TD | chr2 | 90013183 | 90093173 | -0.4987 | 5  | NO  |      |          |          |         |    |         |
| CLL189TD | chr2 | 90044619 | 90090683 | -0.6538 | 4  | YES | chr2 | 89156854 | 90249067 | -0.9460 | 77 | -3.3042 |
| CLL189TD | chr2 | 90152212 | 90265260 | -1.0145 | 16 | YES | chr2 | 89156854 | 90249067 | -0.9460 | 77 | -3.3042 |
| CLL146TD | chr2 | 90226206 | 90240890 | -1.0300 | 2  | YES | chr2 | 90218695 | 90259920 | -1.2370 | 11 | -2.6152 |

|          |       |           |           |         |      |     |       |           |           |          |     |          |
|----------|-------|-----------|-----------|---------|------|-----|-------|-----------|-----------|----------|-----|----------|
| CLL273TD | chr2  | 90226206  | 90253749  | -0.8810 | 4    | YES | chr2  | 90153708  | 90259920  | -0.9064  | 17  | -1.6899  |
| CLL148TD | chr2  | 90226206  | 90253749  | -0.7617 | 4    | YES | chr2  | 90211703  | 90259920  | -0.9871  | 13  | -2.3221  |
| CLL082TD | chr2  | 90230242  | 90265260  | -0.6953 | 7    | YES | chr2  | 89952847  | 90249067  | -1.1368  | 31  | -2.4598  |
| CLL290TD | chr2  | 111391997 | 112490498 | -0.6445 | 52   | YES | chr2  | 111395518 | 112252405 | -0.6467  | 52  | -3.1365  |
| CLL082TD | chr2  | 144137253 | 144323942 | -0.8296 | 5    | NO  |       |           |           |          |     |          |
| CLL279TD | chr2  | 219313919 | 219394922 | -0.2666 | 19   | NO  |       |           |           |          |     |          |
| CLL048TD | chr2  | 232954062 | 243041505 | -0.5994 | 961  | YES | chr2  | 233410189 | 240002779 | -0.6051  | 548 | -2.9720  |
| CLL038TD | chr20 | 3987416   | 4047854   | -0.3313 | 0    | NO  |       |           |           |          |     |          |
| CLL322TD | chr20 | 6207743   | 6241610   | 0.5850  | 0    | NO  |       |           |           |          |     |          |
| CLL020TD | chr20 | 14781213  | 14826157  | -1.3738 | 0    | YES | chr20 | 68319     | 17596034  | -0.6355  | 976 | -2.5639  |
| CLL020TD | chr20 | 17666114  | 26193955  | -0.4327 | 471  | YES | chr20 | 17596522  | 29612290  | -0.4681  | 493 | -2.0619  |
| CLL141TD | chr21 | 15711781  | 16958298  | -0.7604 | 25   | YES | chr21 | 15745911  | 16336974  | -0.8867  | 25  | -3.6095  |
| CLL141TD | chr21 | 17168229  | 17199741  | -0.9189 | 9    | NO  |       |           |           |          |     |          |
| CLL141TD | chr21 | 24455305  | 25158740  | -0.8499 | 0    | NO  |       |           |           |          |     |          |
| CLL280TD | chr22 | 22381553  | 22722107  | -0.8807 | 22   | YES | chr22 | 22385540  | 22724128  | -0.8774  | 23  | -3.1085  |
| CLL168TD | chr22 | 22385947  | 22748867  | -0.6599 | 25   | YES | chr22 | 22385540  | 22735388  | -0.6581  | 26  | -2.4848  |
| CLL173TD | chr22 | 22517433  | 22522289  | -0.7565 | 0    | NO  |       |           |           |          |     |          |
| CLL182TD | chr22 | 22551038  | 23241689  | -0.8108 | 70   | YES | chr22 | 22556219  | 22657565  | -1.8207  | 7   | -3.2332  |
| CLL278TD | chr22 | 22713221  | 23244777  | -0.7171 | 51   | YES | chr22 | 22724128  | 22975934  | -0.8894  | 22  | -3.8973  |
| CLL173TD | chr22 | 22724404  | 22763326  | -0.7364 | 4    | NO  |       |           |           |          |     |          |
| CLL280TD | chr22 | 22724404  | 23247059  | -2.8660 | 47   | YES | chr22 | 22730538  | 23241756  | -9.1392  | 46  | -7.9127  |
| CLL136TD | chr22 | 22733651  | 23234829  | -0.6759 | 42   | YES | chr22 | 22735388  | 23223249  | -0.8792  | 42  | -4.0428  |
| CLL045TD | chr22 | 22736444  | 23234829  | -0.7498 | 42   | YES | chr22 | 22735388  | 23235817  | -0.9112  | 44  | -3.6092  |
| CLL064TD | chr22 | 22736444  | 23247059  | -0.8703 | 47   | YES | chr22 | 22735388  | 23247126  | -1.0508  | 49  | -3.6034  |
| CLL090TD | chr22 | 22736444  | 23247059  | -0.8489 | 50   | YES | chr22 | 22735388  | 23165257  | -1.0235  | 44  | -3.6300  |
| CLL168TD | chr22 | 22749794  | 23247059  | -1.8130 | 47   | YES | chr22 | 22749500  | 23247126  | -2.6228  | 48  | -6.2688  |
| CLL173TD | chr22 | 22765216  | 23247059  | -2.4999 | 45   | YES | chr22 | 22782035  | 22906026  | -9.0236  | 12  | -10.2824 |
| CLL189TD | chr22 | 22825827  | 23247059  | -0.5367 | 43   | YES | chr22 | 22735388  | 23114750  | -0.4651  | 36  | -2.2611  |
| CLL042TD | chr22 | 23026882  | 23246029  | -0.3974 | 23   | YES | chr22 | 22984803  | 23264746  | -0.3468  | 34  | -2.0362  |
| CLL006TD | chr22 | 23041645  | 23054698  | -0.6992 | 1    | NO  |       |           |           |          |     |          |
| CLL020TD | chr22 | 23041645  | 23241689  | -0.8852 | 19   | YES | chr22 | 23046981  | 23241756  | -0.9664  | 20  | -3.1815  |
| CLL029TD | chr22 | 23056362  | 23093788  | -0.8552 | 3    | NO  |       |           |           |          |     |          |
| CLL100TD | chr22 | 23056362  | 23234829  | -0.7863 | 15   | NO  |       |           |           |          |     |          |
| CLL019TD | chr22 | 23056362  | 23240427  | -0.7890 | 17   | YES | chr22 | 23055479  | 23241756  | -0.6726  | 19  | -3.1363  |
| CLL009TD | chr22 | 23056362  | 23247059  | -0.8457 | 18   | YES | chr22 | 23063315  | 23247126  | -0.8632  | 19  | -2.7997  |
| CLL006TD | chr22 | 23056362  | 23247059  | -3.0147 | 18   | YES | chr22 | 23063315  | 23247126  | -5.7736  | 19  | -6.7538  |
| CLL178TD | chr22 | 23062667  | 23092724  | -0.8668 | 3    | NO  |       |           |           |          |     |          |
| CLL082TD | chr22 | 23064017  | 23239061  | -0.7084 | 16   | YES | chr22 | 23077248  | 23241756  | -1.0199  | 17  | -3.8283  |
| CLL272TD | chr22 | 23085408  | 23241689  | -0.7889 | 15   | YES | chr22 | 23077248  | 23241756  | -0.9569  | 17  | -3.3931  |
| CLL029TD | chr22 | 23094250  | 23234829  | -3.2471 | 12   | YES | chr22 | 23101171  | 23223249  | -7.0442  | 12  | -6.7989  |
| CLL178TD | chr22 | 23094250  | 23241689  | -2.7407 | 14   | YES | chr22 | 23154453  | 23223249  | -10.0000 | 7   | -6.8542  |
| CLL018TD | chr22 | 23103564  | 23247059  | -0.8098 | 13   | YES | chr22 | 23101171  | 23237534  | -0.9201  | 14  | -3.0871  |
| CLL041TD | chr22 | 23103564  | 23244777  | -1.7194 | 13   | YES | chr22 | 23114750  | 23241756  | -2.5279  | 13  | -5.7025  |
| CLL146TD | chr22 | 23108423  | 23234829  | -2.4126 | 10   | YES | chr22 | 23114750  | 23235817  | -6.8565  | 11  | -7.2343  |
| CLL276TD | chr22 | 23138710  | 23247059  | -0.6702 | 10   | YES | chr22 | 23135163  | 23247126  | -0.8349  | 12  | -2.6336  |
| CLL032TD | chr22 | 23138710  | 23258429  | -0.6904 | 13   | YES | chr22 | 23135163  | 23256401  | -0.6361  | 14  | -2.8456  |
| CLL194TD | chr22 | 23165575  | 23241689  | -0.7516 | 6    | YES | chr22 | 23165454  | 23241756  | -1.0530  | 7   | -3.7821  |
| CLL152TD | chr22 | 23165575  | 23247059  | -0.8326 | 7    | NO  |       |           |           |          |     |          |
| CLL148TD | chr22 | 23224126  | 23234829  | -0.9807 | 0    | NO  |       |           |           |          |     |          |
| CLL146TD | chr22 | 23238661  | 23247059  | -0.6000 | 1    | NO  |       |           |           |          |     |          |
| CLL152TD | chr22 | 42294616  | 42371108  | -0.5282 | 16   | NO  |       |           |           |          |     |          |
| CLL064TD | chr22 | 47218653  | 51224402  | -0.9280 | 383  | YES | chr22 | 47243690  | 51237147  | -1.1043  | 384 | -2.4403  |
| CLL023TD | chr3  | 61875     | 5848545   | -0.7837 | 205  | YES | chr3  | 361444    | 4403822   | -0.7572  | 110 | -3.5738  |
| CLL141TD | chr3  | 47031601  | 48917211  | -1.0435 | 496  | YES | chr3  | 47030690  | 48921373  | -1.1265  | 499 | -3.4846  |
| CLL174TD | chr3  | 47416540  | 47522517  | -0.8446 | 32   | YES | chr3  | 47437579  | 47476412  | -1.0411  | 31  | -2.9290  |
| CLL155TD | chr3  | 47635955  | 47644751  | -0.7684 | 0    | NO  |       |           |           |          |     |          |
| CLL174TD | chr3  | 47851098  | 49978951  | -0.8177 | 692  | YES | chr3  | 47852127  | 48450938  | -0.9519  | 92  | -4.1059  |
| CLL174TD | chr3  | 52966182  | 53102112  | -0.8415 | 5    | NO  |       |           |           |          |     |          |
| CLL275TD | chr3  | 60240257  | 60279230  | 0.3902  | 0    | NO  |       |           |           |          |     |          |
| CLL039TD | chr3  | 60870865  | 60939318  | -0.8583 | 1    | NO  |       |           |           |          |     |          |
| CLL048TD | chr3  | 118985758 | 197840480 | 0.4404  | 4761 | YES | chr3  | 118945621 | 122591232 | 0.3961   | 401 | 3.3587   |
| CLL100TD | chr3  | 122827975 | 197840480 | 0.5264  | 4435 | YES | chr3  | 123213715 | 125735525 | 0.4992   | 245 | 3.5786   |
| CLL082TD | chr3  | 143106361 | 143252946 | -0.8052 | 6    | YES | chr3  | 143185835 | 143236876 | -0.8840  | 6   | -3.7155  |
| CLL027TD | chr3  | 150511474 | 150567846 | -0.5595 | 0    | NO  |       |           |           |          |     |          |
| CLL045TD | chr3  | 196504448 | 196551297 | -0.3620 | 12   | NO  |       |           |           |          |     |          |
| CLL267TD | chr4  | 421075    | 479412    | -0.7301 | 2    | YES | chr4  | 420216    | 514821    | -0.3361  | 9   | -2.2863  |
| CLL178TD | chr4  | 29141262  | 29784750  | -0.8663 | 1    | NO  |       |           |           |          |     |          |
| CLL100TD | chr4  | 39322462  | 39377923  | -0.6240 | 7    | NO  |       |           |           |          |     |          |
| CLL038TD | chr4  | 151564016 | 151597599 | -0.3597 | 0    | NO  |       |           |           |          |     |          |
| CLL027TD | chr4  | 151570424 | 151597599 | -0.5820 | 0    | NO  |       |           |           |          |     |          |
| CLL009TD | chr4  | 171423540 | 190916819 | -0.7784 | 566  | YES | chr4  | 171525921 | 190882911 | -0.8190  | 562 | -3.7661  |
| CLL136TD | chr5  | 20695683  | 20939003  | -0.3266 | 0    | NO  |       |           |           |          |     |          |
| CLL136TD | chr5  | 34069555  | 34402627  | -0.3432 | 9    | NO  |       |           |           |          |     |          |

|          |      |           |           |         |      |     |      |           |           |         |      |         |
|----------|------|-----------|-----------|---------|------|-----|------|-----------|-----------|---------|------|---------|
| CLL168TD | chr5 | 34069555  | 34402627  | -0.4189 | 9    | NO  |      |           |           |         |      |         |
| CLL279TD | chr5 | 34069555  | 34480071  | -0.4293 | 9    | NO  |      |           |           |         |      |         |
| CLL152TD | chr5 | 78450787  | 78508370  | -0.8234 | 0    | NO  |      |           |           |         |      |         |
| CLL064TD | chr5 | 78464596  | 78502685  | -0.6047 | 0    | NO  |      |           |           |         |      |         |
| CLL027TD | chr5 | 108643441 | 108698690 | -0.4339 | 4    | NO  |      |           |           |         |      |         |
| CLL023TD | chr5 | 133913776 | 133982166 | -0.6022 | 7    | NO  |      |           |           |         |      |         |
| CLL173TD | chr6 | 296474    | 381523    | -0.3413 | 7    | NO  |      |           |           |         |      |         |
| CLL178TD | chr6 | 387408    | 50073545  | 0.4160  | 4414 | YES | chr6 | 395830    | 32427550  | 0.4234  | 2299 | 2.8874  |
| CLL152TD | chr6 | 18288883  | 18359933  | -0.4571 | 0    | NO  |      |           |           |         |      |         |
| CLL027TD | chr6 | 51827829  | 51865122  | -0.5130 | 0    | NO  |      |           |           |         |      |         |
| CLL048TD | chr6 | 62414996  | 62479221  | 0.6760  | 1    | NO  |      |           |           |         |      |         |
| CLL082TD | chr6 | 62745557  | 62873715  | -0.8453 | 1    | NO  |      |           |           |         |      |         |
| CLL049TD | chr6 | 79892342  | 120465184 | -0.7504 | 1725 | YES | chr6 | 79911333  | 90305623  | -0.8027 | 471  | -3.7545 |
| CLL152TD | chr6 | 101171890 | 101212177 | -0.4114 | 1    | NO  |      |           |           |         |      |         |
| CLL019TD | chr7 | 40062122  | 40144404  | -0.8148 | 10   | YES | chr7 | 40085409  | 40133673  | -0.9796 | 10   | -4.1262 |
| CLL152TD | chr7 | 71559725  | 71589033  | -0.7524 | 1    | NO  |      |           |           |         |      |         |
| CLL027TD | chr7 | 71559725  | 71597824  | -0.6152 | 1    | NO  |      |           |           |         |      |         |
| CLL100TD | chr7 | 71568404  | 71585893  | -0.6700 | 1    | NO  |      |           |           |         |      |         |
| CLL144TD | chr7 | 85594936  | 85741498  | 0.5414  | 0    | NO  |      |           |           |         |      |         |
| CLL178TD | chr7 | 114334126 | 133589746 | -0.8731 | 981  | YES | chr7 | 114563472 | 133580299 | -0.9634 | 981  | -3.7746 |
| CLL152TD | chr7 | 131843507 | 131899241 | -0.5483 | 16   | NO  |      |           |           |         |      |         |
| CLL017TD | chr7 | 156792750 | 156803343 | -0.7515 | 3    | NO  |      |           |           |         |      |         |
| CLL152TD | chr7 | 159097982 | 159128663 | -1.0208 | 0    | NO  |      |           |           |         |      |         |
| CLL290TD | chr8 | 161272    | 29030957  | -0.7051 | 1532 | YES | chr8 | 142120    | 7056066   | -0.7127 | 230  | -3.3682 |
| CLL043TD | chr8 | 176293    | 41305627  | -0.6845 | 2125 | YES | chr8 | 142120    | 9634112   | -0.8545 | 303  | -3.3608 |
| CLL282TD | chr8 | 176654    | 34630057  | -0.8628 | 1705 | YES | chr8 | 163525    | 7005679   | -0.9576 | 227  | -3.9727 |
| CLL282TD | chr8 | 34638882  | 43388433  | 0.4766  | 637  | YES | chr8 | 35383169  | 43415755  | 0.4476  | 638  | 3.1944  |
| CLL009TD | chr8 | 39274937  | 39381262  | -0.6073 | 0    | NO  |      |           |           |         |      |         |
| CLL282TD | chr8 | 47777490  | 56161593  | -0.8713 | 277  | YES | chr8 | 47886143  | 56015292  | -0.9481 | 277  | -4.5790 |
| CLL178TD | chr8 | 56882676  | 86550838  | 0.5108  | 930  | YES | chr8 | 56879244  | 67062402  | 0.4892  | 261  | 3.5577  |
| CLL064TD | chr8 | 59529447  | 144292596 | 0.5558  | 3155 | YES | chr8 | 59515736  | 67341285  | 0.5497  | 191  | 4.2217  |
| CLL290TD | chr8 | 92935342  | 146239365 | 0.4850  | 2470 | YES | chr8 | 92972427  | 97172447  | 0.4605  | 220  | 3.4571  |
| CLL145TD | chr8 | 110274049 | 146294242 | 0.4730  | 1670 | YES | chr8 | 110283176 | 143559513 | 0.5518  | 1217 | 4.0530  |
| CLL009TD | chr8 | 128208374 | 128247684 | 0.7057  | 0    | NO  |      |           |           |         |      |         |
| CLL152TD | chr8 | 146261357 | 146294242 | -0.8639 | 5    | NO  |      |           |           |         |      |         |
| CLL083TD | chr9 | 70984281  | 77075175  | -0.7101 | 274  | YES | chr9 | 70484362  | 75906141  | -0.7681 | 278  | -3.4753 |
| CLL279TD | chr9 | 74571577  | 74591097  | -0.7701 | 2    | NO  |      |           |           |         |      |         |
| CLL186TD | chr9 | 95142442  | 95204491  | -0.8971 | 9    | YES | chr9 | 95147866  | 95178890  | -0.8864 | 9    | -4.2291 |
| CLL146TD | chr9 | 129604944 | 129644649 | -0.4413 | 1    | NO  |      |           |           |         |      |         |
| CLL048TD | chr9 | 129620665 | 132552492 | -0.2879 | 643  | NO  |      |           |           |         |      |         |
| CLL100TD | chr9 | 129623945 | 129657519 | -0.6836 | 1    | NO  |      |           |           |         |      |         |
