# Supplementary material for: Estimation of Copy Number Alterations from Exome Sequencing Data
Source: PubMed Central journal article supplement (PMC3526607; doi:10.1371/journal.pone.0051422), 2012-12-19
Supplement: pone.0051422.s002.pdf [file pone.0051422.s002.pdf]

| EXOME     |       |           |           |           |         |         | aCGH  |       |           |           |           |         |          |
|-----------|-------|-----------|-----------|-----------|---------|---------|-------|-------|-----------|-----------|-----------|---------|----------|
| CASE      | CHROM | START     | END       | LOG2RATIO | # EXONS | StdDev  | FOUND | CHROM | START     | END       | LOG2RATIO | # EXONS | COMMENTS |
| CLL274TD  | chr1  | 7700386   | 7792463   | 0.9364    | 6       | 1.7122  | NO    |       |           |           |           |         |          |
| CLL006TD  | chr1  | 12081780  | 12091731  | 0.7815    | 8       | 1.7661  | NO    |       |           |           |           |         |          |
| CLL082TD  | chr1  | 22150070  | 22154323  | -1.2911   | 6       | -1.7311 | NO    |       |           |           |           |         |          |
| CLL191TD  | chr1  | 40041376  | 40205825  | 0.4663    | 15      | 1.6521  | NO    |       |           |           |           |         |          |
| CLL191TD  | chr1  | 40773800  | 40778203  | 0.5203    | 8       | 2.3475  | NO    |       |           |           |           |         |          |
| CLL145TD  | chr1  | 41578866  | 43282098  | -0.8159   | 110     | -3.3368 | YES   | chr1  | 41572891  | 43287342  | -0.7145   | 110     |          |
| CLL148TD  | chr1  | 46086934  | 46088404  | 0.5899    | 6       | 1.6053  | NO    |       |           |           |           |         |          |
| CLL155TD  | chr1  | 78432316  | 78444463  | -0.8221   | 8       | -3.1091 | YES   | chr1  | 78433832  | 78452941  | -0.8181   | 4       |          |
| CLL189TD  | chr1  | 109808298 | 109814813 | -0.3676   | 11      | -1.7640 | NO    |       |           |           |           |         |          |
| CLL157TD  | chr1  | 150676571 | 150684258 | -0.4427   | 7       | -1.8885 | NO    |       |           |           |           |         |          |
| CLL082TD  | chr1  | 227171233 | 227172907 | -0.7919   | 6       | -2.2318 | NO    |       |           |           |           |         |          |
| CLL170TD  | chr1  | 230410130 | 230492613 | -0.5019   | 8       | -2.1555 | NO    |       |           |           |           |         |          |
| CLL049TD  | chr10 | 102675717 | 106214143 | -0.8608   | 638     | -3.2902 | YES   | chr10 | 102641828 | 106419703 | -0.7237   | 638     |          |
| CLL141TD  | chr10 | 103649117 | 104176108 | -1.0251   | 133     | -3.9548 | YES   | chr10 | 103634312 | 104177223 | -1.0034   | 133     |          |
| CLL064TD  | chr10 | 104160694 | 104196244 | -0.6812   | 25      | -1.9207 | YES   | chr10 | 104161255 | 104192055 | -0.7374   | 22      |          |
| CLL178TD  | chr10 | 104160862 | 104852860 | -0.8987   | 126     | -2.9443 | YES   | chr10 | 104159664 | 104853373 | -0.7501   | 130     |          |
| CLL178TD  | chr10 | 105036937 | 105093635 | -0.8543   | 7       | -3.1110 | YES   | chr10 | 105007763 | 105100437 | -0.8027   | 7       |          |
| CLL184TD  | chr11 | 43333651  | 45277209  | -0.9153   | 140     | -3.4682 | YES   | chr11 | 42655597  | 45369571  | -0.7617   | 140     |          |
| CLL110TD  | chr11 | 61551299  | 61557929  | -0.8842   | 6       | -1.8015 | NO    |       |           |           |           |         |          |
| CLL275TD  | chr11 | 67262471  | 67265981  | 0.9377    | 6       | 2.0489  | NO    |       |           |           |           |         |          |
| CLL275TD  | chr11 | 72423162  | 72469536  | 0.7485    | 6       | 1.7023  | NO    |       |           |           |           |         |          |
| CLL042TD  | chr11 | 76956316  | 116656464 | -0.4984   | 1805    | -2.9969 | YES   | chr11 | 76513928  | 117661843 | -0.4171   | 2028    |          |
| CLL023TD  | chr11 | 77300986  | 77924655  | -1.0005   | 80      | -3.5747 | YES   | chr11 | 77179449  | 117609214 | -0.8262   | 1961    |          |
| CLL023TD  | chr11 | 77930269  | 102953959 | -0.8191   | 893     | -3.8962 | YES   | chr11 | 77179449  | 117609214 | -0.8262   | 1961    |          |
| CLL006TD  | chr11 | 78270534  | 89449046  | -0.9866   | 331     | -3.9747 | YES   | chr11 | 78240712  | 116777756 | -0.9000   | 1734    |          |
| CLL290TD  | chr11 | 82533422  | 89608133  | -0.9468   | 311     | -3.8275 | YES   | chr11 | 79590720  | 116062438 | -0.8491   | 1643    |          |
| CLL054TD  | chr11 | 86055583  | 114578256 | -0.9208   | 1462    | -3.8902 | YES   | chr11 | 86053929  | 114937176 | -0.7975   | 1462    |          |
| CLL006TD  | chr11 | 89595601  | 89774166  | -1.2697   | 10      | -1.8505 | YES   | chr11 | 78240712  | 116777756 | -0.9000   | 1734    |          |
| CLL290TD  | chr11 | 89719169  | 115110946 | -0.9575   | 1328    | -4.2622 | YES   | chr11 | 79590720  | 116062438 | -0.8491   | 1643    |          |
| CLL006TD  | chr11 | 89867907  | 103022819 | -0.9991   | 542     | -4.5365 | YES   | chr11 | 78240712  | 116777756 | -0.9000   | 1734    |          |
| CLL178TD  | chr11 | 92523066  | 102398480 | -0.8893   | 400     | -4.3660 | YES   | chr11 | 92513723  | 133254506 | -0.8701   | 2738    |          |
| CLL041TD  | chr11 | 94800334  | 111941112 | -0.6348   | 834     | -3.0826 | YES   | chr11 | 94769441  | 123056760 | -0.6585   | 1930    |          |
| CLL278TD  | chr11 | 99690199  | 116747578 | -0.9151   | 1061    | -4.0853 | YES   | chr11 | 96159104  | 116753164 | -0.8110   | 1063    |          |
| CLL184TD  | chr11 | 101324358 | 103027067 | -0.8296   | 178     | -4.1564 | YES   | chr11 | 101194338 | 117964476 | -0.5119   | 1171    |          |
| CLL145TD  | chr11 | 101761989 | 134320539 | -0.8880   | 2517    | -3.7222 | YES   | chr11 | 101389939 | 134945306 | -0.7980   | 2517    |          |
| CLL178TD  | chr11 | 102449761 | 104896973 | -0.8676   | 202     | -4.0423 | YES   | chr11 | 92513723  | 133254506 | -0.8701   | 2738    |          |
| CLL023TD  | chr11 | 102959911 | 103156929 | -0.6066   | 76      | -3.5964 | YES   | chr11 | 77179449  | 117609214 | -0.8262   | 1961    |          |
| CLL006TD  | chr11 | 103026024 | 116767850 | -0.9676   | 833     | -4.0744 | YES   | chr11 | 78240712  | 116777756 | -0.9000   | 1734    |          |
| CLL184TD  | chr11 | 103033756 | 106558228 | -0.8164   | 141     | -4.1246 | YES   | chr11 | 101194338 | 117964476 | -0.5119   | 1171    |          |
| CLL023TD  | chr11 | 103158237 | 110501282 | -0.7949   | 352     | -3.8702 | YES   | chr11 | 77179449  | 117609214 | -0.8262   | 1961    |          |
| CLL178TD  | chr11 | 104903761 | 107686483 | -0.9149   | 107     | -4.1996 | YES   | chr11 | 92513723  | 133254506 | -0.8701   | 2738    |          |
| CLL0177TD | chr11 | 105836610 | 128564063 | -0.9707   | 1914    | -3.7459 | YES   | chr11 | 105820665 | 128506612 | -0.8830   | 1913    |          |
| CLL063TD  | chr11 | 106558228 | 108122540 | -1.0001   | 128     | -4.2278 | YES   | chr11 | 106420522 | 108122884 | -0.8464   | 128     |          |
| CLL178TD  | chr11 | 107832644 | 110482011 | -0.9038   | 186     | -3.9846 | YES   | chr11 | 92513723  | 133254506 | -0.8701   | 2738    |          |
| CLL038TD  | chr11 | 109294356 | 113779976 | -0.7561   | 338     | -3.2607 | YES   | chr11 | 109139541 | 113781239 | -0.6921   | 338     |          |
| CLL063TD  | chr11 | 110306499 | 115110946 | -0.9450   | 388     | -3.9442 | YES   | chr11 | 110211047 | 116153447 | -0.8626   | 388     |          |
| CLL178TD  | chr11 | 110485266 | 124543510 | -0.9933   | 1347    | -3.7972 | YES   | chr11 | 92513723  | 133254506 | -0.8701   | 2738    |          |
| CLL023TD  | chr11 | 110561220 | 116658158 | -0.9118   | 395     | -3.7956 | YES   | chr11 | 77179449  | 117609214 | -0.8262   | 1961    |          |
| CLL041TD  | chr11 | 111941704 | 117089142 | -0.7522   | 331     | -3.1063 | YES   | chr11 | 94769441  | 123056760 | -0.6585   | 1930    |          |
| CLL184TD  | chr11 | 112832058 | 117947958 | -0.9237   | 408     | -3.1459 | YES   | chr11 | 101194338 | 117964476 | -0.5119   | 1171    |          |
| CLL042TD  | chr11 | 116657165 | 117306287 | -0.3421   | 141     | -2.5903 | YES   | chr11 | 76513928  | 117661843 | -0.4171   | 2028    |          |
| CLL023TD  | chr11 | 116660833 | 117403013 | -1.1238   | 165     | -3.1420 | YES   | chr11 | 77179449  | 117609214 | -0.8262   | 1961    |          |
| CLL041TD  | chr11 | 117094742 | 117691501 | -0.8020   | 89      | -2.6719 | YES   | chr11 | 94769441  | 123056760 | -0.6585   | 1930    |          |
| CLL041TD  | chr11 | 117695320 | 123065544 | -0.7651   | 671     | -3.0469 | YES   | chr11 | 94769441  | 123056760 | -0.6585   | 1930    |          |
| CLL178TD  | chr11 | 124545087 | 132812783 | -0.9204   | 487     | -3.5714 | YES   | chr11 | 92513723  | 133254506 | -0.8701   | 2738    |          |
| CLL277TD  | chr12 | 73256     | 6438371   | 0.4235    | 590     | 2.5946  | YES   | chr12 | 163393    | 34756350  | 0.4735    | 2822    |          |
| CLL032TD  | chr12 | 87509     | 7343411   | 0.5589    | 965     | 3.0818  | YES   | chr12 | 191809    | 34756350  | 0.4431    | 2789    |          |
| CLL275TD  | chr12 | 148430    | 346239    | 0.7021    | 36      | 3.3612  | YES   | chr12 | 163393    | 34756350  | 0.5169    | 2808    |          |
| CLL064TD  | chr12 | 148430    | 645362    | 0.4080    | 81      | 3.0082  | YES   | chr12 | 189361    | 34417592  | 0.5136    | 2804    |          |
| CLL282TD  | chr12 | 148430    | 6125206   | 0.5052    | 525     | 3.1675  | YES   | chr12 | 194049    | 34756350  | 0.5133    | 2789    |          |
| CLL166TD  | chr12 | 148430    | 9596082   | 0.5140    | 1354    | 3.2107  | YES   | chr12 | 250702    | 34360180  | 0.4152    | 2810    |          |
| CLL005TD  | chr12 | 148430    | 48191104  | 0.5231    | 3471    | 3.5899  | YES   | chr12 | 163393    | 34533264  | 0.5302    | 2821    |          |
| CLL045TD  | chr12 | 148999    | 3149497   | 0.4568    | 352     | 2.6347  | YES   | chr12 | 189361    | 34756350  | 0.4822    | 2805    |          |
| CLL148TD  | chr12 | 278134    | 347073    | 0.8518    | 26      | 3.1842  | YES   | chr12 | 189361    | 34756350  | 0.4976    | 2776    |          |
| CLL082TD  | chr12 | 332288    | 6861035   | 0.4501    | 740     | 2.5129  | YES   | chr12 | 191809    | 34756350  | 0.5293    | 2769    |          |
| CLL275TD  | chr12 | 347073    | 1599207   | 0.4713    | 134     | 3.1065  | YES   | chr12 | 163393    | 34756350  | 0.5169    | 2808    |          |
| CLL148TD  | chr12 | 351729    | 550892    | 0.3805    | 42      | 3.3197  | YES   | chr12 | 189361    | 34756350  | 0.4976    | 2776    |          |
| CLL148TD  | chr12 | 644293    | 772458    | 0.7710    | 27      | 3.0650  | YES   | chr12 | 189361    | 34756350  | 0.4976    | 2776    |          |
| CLL064TD  | chr12 | 653492    | 2921914   | 0.5311    | 219     | 3.2189  | YES   | chr12 | 189361    | 34417592  | 0.5136    | 2804    |          |
| CLL148TD  | chr12 | 862660    | 1023557   | 0.4565    | 34      | 3.7551  | YES   | chr12 | 189361    | 34756350  | 0.4976    | 2776    |          |
| CLL148TD  | chr12 | 1025775   | 4397961   | 0.6344    | 260     | 3.3222  | YES   | chr12 | 189361    | 34756350  | 0.4976    | 2776    |          |
| CLL275TD  | chr12 | 1675858   | 7344110   | 0.6354    | 807     | 3.9726  | YES   | chr12 | 163393    | 34756350  | 0.5169    | 2808    |          |
| CLL064TD  | chr12 | 2926376   | 3149228   | 0.3363    | 53      | 2.3844  | YES   | chr12 | 189361    | 34417592  | 0.5136    | 2804    |          |
| CLL064TD  | chr12 | 3149497   | 6130983   | 0.5811    | 180     | 3.8526  | YES   | chr12 | 189361    | 34417592  | 0.5136    | 2804    |          |
| CLL045TD  | chr12 | 3310330   | 57596111  | 0.4915    | 5249    | 3.0283  | YES   | chr12 | 189361    | 34756350  | 0.4822    | 2805    |          |
| CLL148TD  | chr12 | 4408980   | 4835636   | 0.4218    | 63      | 2.9891  | YES   | chr12 | 189361    | 34756350  | 0.4976    | 2776    |          |

|          |       |          |           |         |      |         |     |       |          |           |          |      |  |
|----------|-------|----------|-----------|---------|------|---------|-----|-------|----------|-----------|----------|------|--|
| CLL148TD | chr12 | 4848316  | 6090904   | 0.6120  | 54   | 3.9517  | YES | chr12 | 189361   | 34756350  | 0.4976   | 2776 |  |
| CLL148TD | chr12 | 6103018  | 6928389   | 0.6494  | 269  | 3.3788  | YES | chr12 | 189361   | 34756350  | 0.4976   | 2776 |  |
| CLL282TD | chr12 | 6125668  | 8328392   | 0.4419  | 584  | 3.0589  | YES | chr12 | 194049   | 34756350  | 0.5133   | 2789 |  |
| CLL064TD | chr12 | 6132754  | 9010499   | 0.4223  | 676  | 2.8543  | YES | chr12 | 189361   | 34417592  | 0.5136   | 2804 |  |
| CLL277TD | chr12 | 6439204  | 9586653   | 0.4334  | 776  | 2.5196  | YES | chr12 | 163393   | 34756350  | 0.4735   | 2822 |  |
| CLL148TD | chr12 | 6932861  | 6952921   | 1.0007  | 27   | 3.4516  | YES | chr12 | 189361   | 34756350  | 0.4976   | 2776 |  |
| CLL148TD | chr12 | 6954707  | 7031182   | 0.6965  | 49   | 3.6571  | YES | chr12 | 189361   | 34756350  | 0.4976   | 2776 |  |
| CLL148TD | chr12 | 7031475  | 7075016   | 1.0131  | 30   | 3.4866  | YES | chr12 | 189361   | 34756350  | 0.4976   | 2776 |  |
| CLL148TD | chr12 | 7075563  | 7479511   | 0.6209  | 99   | 3.7228  | YES | chr12 | 189361   | 34756350  | 0.4976   | 2776 |  |
| CLL082TD | chr12 | 7342896  | 9392014   | 0.564   | 346  | 3.7164  | YES | chr12 | 191809   | 34756350  | 0.529285 | 2769 |  |
| CLL032TD | chr12 | 7343767  | 9554990   | 0.4331  | 360  | 3.7079  | YES | chr12 | 191809   | 34756350  | 0.443094 | 2789 |  |
| CLL275TD | chr12 | 7351567  | 30906217  | 0.4951  | 1652 | 2.9918  | YES | chr12 | 163393   | 34756350  | 0.51692  | 2808 |  |
| CLL148TD | chr12 | 7480865  | 9980122   | 0.4811  | 377  | 3.1391  | YES | chr12 | 189361   | 34756350  | 0.497552 | 2776 |  |
| CLL282TD | chr12 | 8329466  | 48119078  | 0.5237  | 2283 | 3.7832  | YES | chr12 | 194049   | 34756350  | 0.5133   | 2789 |  |
| CLL064TD | chr12 | 9013453  | 9596082   | 0.5870  | 139  | 4.1324  | YES | chr12 | 189361   | 34417592  | 0.5136   | 2804 |  |
| CLL032TD | chr12 | 9571220  | 9728204   | 0.7315  | 45   | 1.8387  | YES | chr12 | 191809   | 34756350  | 0.4431   | 2789 |  |
| CLL277TD | chr12 | 9726035  | 50474278  | 0.4501  | 2606 | 2.8220  | YES | chr12 | 163393   | 34756350  | 0.4735   | 2822 |  |
| CLL064TD | chr12 | 9728204  | 19444544  | 0.5654  | 570  | 3.9933  | YES | chr12 | 189361   | 34417592  | 0.5136   | 2804 |  |
| CLL032TD | chr12 | 9747823  | 31106907  | 0.4180  | 1248 | 4.0678  | YES | chr12 | 191809   | 34756350  | 0.4431   | 2789 |  |
| CLL082TD | chr12 | 9747823  | 48096426  | 0.5740  | 2020 | 4.4115  | YES | chr12 | 191809   | 34756350  | 0.5293   | 2769 |  |
| CLL166TD | chr12 | 9747823  | 120802447 | 0.5088  | 8316 | 3.3625  | YES | chr12 | 250702   | 34360180  | 0.4152   | 2810 |  |
| CLL148TD | chr12 | 9984900  | 10762424  | 0.3385  | 116  | 2.9185  | YES | chr12 | 189361   | 34756350  | 0.4976   | 2776 |  |
| CLL148TD | chr12 | 10763200 | 15834088  | 0.4721  | 330  | 3.5020  | YES | chr12 | 189361   | 34756350  | 0.4976   | 2776 |  |
| CLL148TD | chr12 | 15835795 | 27923965  | 0.3829  | 644  | 3.1409  | YES | chr12 | 189361   | 34756350  | 0.4976   | 2776 |  |
| CLL064TD | chr12 | 19593220 | 31246158  | 0.5534  | 683  | 3.9949  | YES | chr12 | 189361   | 34417592  | 0.5136   | 2804 |  |
| CLL148TD | chr12 | 27933219 | 31106907  | 0.4467  | 137  | 3.6008  | YES | chr12 | 189361   | 34756350  | 0.4976   | 2776 |  |
| CLL275TD | chr12 | 31106907 | 31256437  | 0.8972  | 31   | 3.6639  | YES | chr12 | 163393   | 34756350  | 0.5169   | 2808 |  |
| CLL032TD | chr12 | 31116706 | 31241911  | 0.8810  | 12   | 2.3319  | YES | chr12 | 191809   | 34756350  | 0.4431   | 2789 |  |
| CLL148TD | chr12 | 31116706 | 31256437  | 0.8566  | 29   | 2.2649  | YES | chr12 | 189361   | 34756350  | 0.4976   | 2776 |  |
| CLL032TD | chr12 | 31242290 | 48096426  | 0.4137  | 758  | 4.1407  | YES | chr12 | 191809   | 34756350  | 0.4431   | 2789 |  |
| CLL064TD | chr12 | 31247485 | 33031849  | 0.4241  | 150  | 3.1594  | YES | chr12 | 189361   | 34417592  | 0.5136   | 2804 |  |
| CLL148TD | chr12 | 31265139 | 48104523  | 0.4001  | 744  | 3.3445  | YES | chr12 | 189361   | 34756350  | 0.4976   | 2776 |  |
| CLL275TD | chr12 | 31265139 | 48104523  | 0.4897  | 745  | 2.9494  | YES | chr12 | 163393   | 34756350  | 0.5169   | 2808 |  |
| CLL064TD | chr12 | 33529740 | 48372310  | 0.5683  | 688  | 4.1040  | YES | chr12 | 189361   | 34417592  | 0.5136   | 2804 |  |
| CLL032TD | chr12 | 48104523 | 48376807  | 0.6836  | 87   | 2.4104  | YES | chr12 | 38453410 | 133779217 | 0.4287   | 8061 |  |
| CLL148TD | chr12 | 48105366 | 48391439  | 0.8047  | 109  | 3.0607  | YES | chr12 | 38503256 | 133779217 | 0.4875   | 8100 |  |
| CLL275TD | chr12 | 48105366 | 48391439  | 0.7325  | 110  | 3.8808  | YES | chr12 | 37957940 | 133779217 | 0.5145   | 8151 |  |
| CLL282TD | chr12 | 48131258 | 65612305  | 0.4616  | 2778 | 3.1073  | YES | chr12 | 37957940 | 133779217 | 0.4997   | 8113 |  |
| CLL005TD | chr12 | 48191856 | 58194900  | 0.5623  | 2470 | 3.3912  | YES | chr12 | 38453410 | 133779217 | 0.5251   | 8176 |  |
| CLL064TD | chr12 | 48373230 | 52822344  | 0.4414  | 874  | 3.0000  | YES | chr12 | 38448467 | 133779217 | 0.4811   | 8132 |  |
| CLL032TD | chr12 | 48377134 | 49314638  | 0.4524  | 180  | 3.4196  | YES | chr12 | 38453410 | 133779217 | 0.4287   | 8061 |  |
| CLL082TD | chr12 | 48379499 | 49169039  | 0.4936  | 125  | 3.5663  | YES | chr12 | 38448467 | 133779217 | 0.5185   | 8096 |  |
| CLL148TD | chr12 | 48391907 | 49110227  | 0.4799  | 98   | 3.6482  | YES | chr12 | 38503256 | 133779217 | 0.4875   | 8100 |  |
| CLL275TD | chr12 | 48391907 | 49317932  | 0.5068  | 158  | 3.6103  | YES | chr12 | 37957940 | 133779217 | 0.5145   | 8151 |  |
| CLL148TD | chr12 | 49162316 | 50369200  | 0.7089  | 339  | 3.3504  | YES | chr12 | 38503256 | 133779217 | 0.4875   | 8100 |  |
| CLL082TD | chr12 | 49218895 | 49665982  | 0.4522  | 159  | 2.0693  | YES | chr12 | 38448467 | 133779217 | 0.5185   | 8096 |  |
| CLL032TD | chr12 | 49315772 | 50513793  | 0.5960  | 322  | 2.8769  | YES | chr12 | 38453410 | 133779217 | 0.4287   | 8061 |  |
| CLL275TD | chr12 | 49318327 | 50483954  | 0.6417  | 312  | 3.7852  | YES | chr12 | 37957940 | 133779217 | 0.5145   | 8151 |  |
| CLL030TD | chr12 | 50039551 | 50041935  | -0.8900 | 6    | -1.7050 | NO  |       |          |           |          |      |  |
| CLL082TD | chr12 | 50367685 | 57492999  | 0.4694  | 1582 | 2.5333  | YES | chr12 | 38448467 | 133779217 | 0.5185   | 8096 |  |
| CLL148TD | chr12 | 50383998 | 52188109  | 0.4853  | 285  | 3.2868  | YES | chr12 | 38503256 | 133779217 | 0.4875   | 8100 |  |
| CLL277TD | chr12 | 50475289 | 59267764  | 0.4264  | 1965 | 2.5149  | YES | chr12 | 37957940 | 133779217 | 0.4656   | 8159 |  |
| CLL275TD | chr12 | 50484264 | 51565994  | 0.3888  | 154  | 2.5723  | YES | chr12 | 37957940 | 133779217 | 0.5145   | 8151 |  |
| CLL032TD | chr12 | 50524252 | 51585312  | 0.3929  | 140  | 3.4631  | YES | chr12 | 38453410 | 133779217 | 0.4287   | 8061 |  |
| CLL275TD | chr12 | 51584022 | 55038442  | 0.6070  | 787  | 3.8457  | YES | chr12 | 37957940 | 133779217 | 0.5145   | 8151 |  |
| CLL032TD | chr12 | 51586033 | 54796889  | 0.5670  | 693  | 2.9012  | YES | chr12 | 38453410 | 133779217 | 0.4287   | 8061 |  |
| CLL148TD | chr12 | 52200039 | 53708003  | 0.6961  | 448  | 3.1990  | YES | chr12 | 38503256 | 133779217 | 0.4875   | 8100 |  |
| CLL064TD | chr12 | 52824286 | 53085195  | 0.6478  | 100  | 3.7913  | YES | chr12 | 38448467 | 133779217 | 0.4811   | 8132 |  |
| CLL064TD | chr12 | 53085648 | 54891534  | 0.4279  | 411  | 2.7799  | YES | chr12 | 38448467 | 133779217 | 0.4811   | 8132 |  |
| CLL148TD | chr12 | 53708493 | 56620081  | 0.5901  | 545  | 3.6207  | YES | chr12 | 38503256 | 133779217 | 0.4875   | 8100 |  |
| CLL032TD | chr12 | 54797335 | 54801806  | 0.3076  | 11   | 2.8505  | YES | chr12 | 38453410 | 133779217 | 0.4287   | 8061 |  |
| CLL032TD | chr12 | 54805562 | 55025974  | 0.4058  | 61   | 3.2768  | YES | chr12 | 38453410 | 133779217 | 0.4287   | 8061 |  |
| CLL064TD | chr12 | 54893133 | 56090617  | 0.5704  | 116  | 4.2759  | YES | chr12 | 38448467 | 133779217 | 0.4811   | 8132 |  |
| CLL032TD | chr12 | 55038911 | 56030666  | 0.3931  | 43   | 5.0782  | YES | chr12 | 38453410 | 133779217 | 0.4287   | 8061 |  |
| CLL275TD | chr12 | 55038911 | 57144780  | 0.5143  | 544  | 3.6654  | YES | chr12 | 37957940 | 133779217 | 0.5145   | 8151 |  |
| CLL032TD | chr12 | 56075487 | 56086862  | 0.6792  | 9    | 2.5356  | YES | chr12 | 38453410 | 133779217 | 0.4287   | 8061 |  |
| CLL032TD | chr12 | 56089243 | 56115391  | 0.8501  | 17   | 2.3346  | YES | chr12 | 38453410 | 133779217 | 0.4287   | 8061 |  |
| CLL064TD | chr12 | 56090970 | 58204765  | 0.4209  | 942  | 2.9698  | YES | chr12 | 38448467 | 133779217 | 0.4811   | 8132 |  |
| CLL032TD | chr12 | 56117631 | 57537401  | 0.4676  | 549  | 3.2736  | YES | chr12 | 38453410 | 133779217 | 0.4287   | 8061 |  |
| CLL148TD | chr12 | 56622777 | 56663234  | 0.7942  | 41   | 3.7803  | YES | chr12 | 38503256 | 133779217 | 0.4875   | 8100 |  |
| CLL148TD | chr12 | 56663897 | 56716831  | 0.3915  | 26   | 2.4518  | YES | chr12 | 38503256 | 133779217 | 0.4875   | 8100 |  |
| CLL148TD | chr12 | 56717071 | 57037158  | 0.6182  | 141  | 3.9448  | YES | chr12 | 38503256 | 133779217 | 0.4875   | 8100 |  |
| CLL148TD | chr12 | 57037440 | 57317575  | 0.3784  | 36   | 2.8113  | YES | chr12 | 38503256 | 133779217 | 0.4875   | 8100 |  |
| CLL275TD | chr12 | 57145910 | 57435188  | 0.6657  | 36   | 4.6738  | YES | chr12 | 37957940 | 133779217 | 0.5145   | 8151 |  |
| CLL148TD | chr12 | 57323105 | 57432572  | 0.7522  | 27   | 4.2480  | YES | chr12 | 38503256 | 133779217 | 0.4875   | 8100 |  |
| CLL148TD | chr12 | 57432966 | 57466512  | 0.4508  | 22   | 2.8803  | YES | chr12 | 38503256 | 133779217 | 0.4875   | 8100 |  |
| CLL275TD | chr12 | 57436808 | 57535105  | 0.4981  | 42   | 3.6044  | YES | chr12 | 37957940 | 133779217 | 0.5145   | 8151 |  |
| CLL148TD | chr12 | 57472314 | 57543427  | 0.7364  | 27   | 3.1541  | YES | chr12 | 38503256 | 133779217 | 0.4875   | 8100 |  |

|          |       |           |           |         |      |         |     |       |           |           |         |      |  |
|----------|-------|-----------|-----------|---------|------|---------|-----|-------|-----------|-----------|---------|------|--|
| CLL275TD | chr12 | 57537401  | 57593583  | 0.6493  | 55   | 3.7761  | YES | chr12 | 37957940  | 133779217 | 0.5145  | 8151 |  |
| CLL032TD | chr12 | 57538698  | 57637819  | 0.7392  | 94   | 2.1750  | YES | chr12 | 38453410  | 133779217 | 0.4287  | 8061 |  |
| CLL148TD | chr12 | 57547951  | 57630749  | 0.9000  | 88   | 3.0793  | YES | chr12 | 38503256  | 133779217 | 0.4875  | 8100 |  |
| CLL275TD | chr12 | 57594181  | 57625243  | 0.8744  | 28   | 4.1649  | YES | chr12 | 37957940  | 133779217 | 0.5145  | 8151 |  |
| CLL045TD | chr12 | 57598102  | 110815189 | 0.5003  | 3148 | 3.2116  | YES | chr12 | 38503256  | 133779217 | 0.4753  | 8112 |  |
| CLL275TD | chr12 | 57625445  | 58335599  | 0.5804  | 308  | 3.8402  | YES | chr12 | 37957940  | 133779217 | 0.5145  | 8151 |  |
| CLL148TD | chr12 | 57637553  | 59271167  | 0.6453  | 303  | 3.5370  | YES | chr12 | 38503256  | 133779217 | 0.4875  | 8100 |  |
| CLL032TD | chr12 | 57638272  | 58335599  | 0.5338  | 291  | 3.1233  | YES | chr12 | 38453410  | 133779217 | 0.4287  | 8061 |  |
| CLL082TD | chr12 | 57651726  | 58209730  | 0.4542  | 270  | 2.3052  | YES | chr12 | 38448467  | 133779217 | 0.5185  | 8096 |  |
| CLL005TD | chr12 | 58195886  | 123466341 | 0.5144  | 4295 | 3.5227  | YES | chr12 | 38453410  | 133779217 | 0.5251  | 8176 |  |
| CLL064TD | chr12 | 58206995  | 68946715  | 0.5191  | 401  | 3.7617  | YES | chr12 | 38448467  | 133779217 | 0.4811  | 8132 |  |
| CLL082TD | chr12 | 58223154  | 108589530 | 0.5711  | 2472 | 4.3933  | YES | chr12 | 38448467  | 133779217 | 0.5185  | 8096 |  |
| CLL032TD | chr12 | 58339373  | 106852981 | 0.4025  | 2367 | 3.9625  | YES | chr12 | 38453410  | 133779217 | 0.4287  | 8061 |  |
| CLL275TD | chr12 | 58339373  | 107002572 | 0.4796  | 2388 | 2.8367  | YES | chr12 | 37957940  | 133779217 | 0.5145  | 8151 |  |
| CLL277TD | chr12 | 59268163  | 85421618  | 0.4686  | 1100 | 2.9491  | YES | chr12 | 37957940  | 133779217 | 0.4656  | 8159 |  |
| CLL148TD | chr12 | 59272566  | 102590729 | 0.3855  | 2031 | 3.2140  | YES | chr12 | 38503256  | 133779217 | 0.4875  | 8100 |  |
| CLL282TD | chr12 | 65632261  | 110023788 | 0.5019  | 2451 | 3.5810  | YES | chr12 | 37957940  | 133779217 | 0.4997  | 8113 |  |
| CLL064TD | chr12 | 68947195  | 69250157  | 0.3382  | 52   | 2.8942  | YES | chr12 | 38448467  | 133779217 | 0.4811  | 8132 |  |
| CLL064TD | chr12 | 69252656  | 70206718  | 0.5333  | 76   | 3.7798  | YES | chr12 | 38448467  | 133779217 | 0.4811  | 8132 |  |
| CLL064TD | chr12 | 70209124  | 93100330  | 0.5969  | 796  | 4.2691  | YES | chr12 | 38448467  | 133779217 | 0.4811  | 8132 |  |
| CLL277TD | chr12 | 85431870  | 103795358 | 0.4786  | 967  | 2.7710  | YES | chr12 | 37957940  | 133779217 | 0.4656  | 8159 |  |
| CLL064TD | chr12 | 93101398  | 110353126 | 0.4844  | 1423 | 3.5024  | YES | chr12 | 38448467  | 133779217 | 0.4811  | 8132 |  |
| CLL148TD | chr12 | 102591243 | 104190620 | 0.5601  | 105  | 3.5181  | YES | chr12 | 38503256  | 133779217 | 0.4875  | 8100 |  |
| CLL277TD | chr12 | 103872105 | 133778670 | 0.4300  | 2953 | 2.3327  | YES | chr12 | 37957940  | 133779217 | 0.4656  | 8159 |  |
| CLL148TD | chr12 | 104192319 | 107486510 | 0.4155  | 278  | 3.2793  | YES | chr12 | 38503256  | 133779217 | 0.4875  | 8100 |  |
| CLL032TD | chr12 | 106857206 | 110353126 | 0.5424  | 369  | 3.3523  | YES | chr12 | 38453410  | 133779217 | 0.4287  | 8061 |  |
| CLL275TD | chr12 | 107033079 | 122861921 | 0.5655  | 1720 | 3.3084  | YES | chr12 | 37957940  | 133779217 | 0.5145  | 8151 |  |
| CLL148TD | chr12 | 107713729 | 110028530 | 0.5415  | 285  | 3.2609  | YES | chr12 | 38503256  | 133779217 | 0.4875  | 8100 |  |
| CLL082TD | chr12 | 108600002 | 110296426 | 0.4317  | 259  | 2.4837  | YES | chr12 | 38448467  | 133779217 | 0.5185  | 8096 |  |
| CLL282TD | chr12 | 110024521 | 132393420 | 0.4293  | 2038 | 2.8457  | YES | chr12 | 37957940  | 133779217 | 0.4997  | 8113 |  |
| CLL148TD | chr12 | 110028983 | 110240721 | 0.8914  | 17   | 2.8876  | YES | chr12 | 38503256  | 133779217 | 0.4875  | 8100 |  |
| CLL148TD | chr12 | 110246036 | 110399071 | 0.5541  | 30   | 3.0812  | YES | chr12 | 38503256  | 133779217 | 0.4875  | 8100 |  |
| CLL082TD | chr12 | 110342509 | 113531304 | 0.5028  | 494  | 3.2910  | YES | chr12 | 38448467  | 133779217 | 0.5185  | 8096 |  |
| CLL032TD | chr12 | 110354321 | 112585872 | 0.3912  | 338  | 3.0093  | YES | chr12 | 38453410  | 133779217 | 0.4287  | 8061 |  |
| CLL064TD | chr12 | 110354321 | 113313454 | 0.3866  | 441  | 2.9193  | YES | chr12 | 38448467  | 133779217 | 0.4811  | 8132 |  |
| CLL148TD | chr12 | 110399393 | 111070260 | 0.3941  | 126  | 2.8791  | YES | chr12 | 38503256  | 133779217 | 0.4875  | 8100 |  |
| CLL045TD | chr12 | 110819504 | 133778670 | 0.4448  | 2168 | 2.5612  | YES | chr12 | 38503256  | 133779217 | 0.4753  | 8112 |  |
| CLL148TD | chr12 | 111072078 | 111734249 | 0.5702  | 55   | 3.0231  | YES | chr12 | 38503256  | 133779217 | 0.4875  | 8100 |  |
| CLL189TD | chr12 | 111731189 | 111749864 | -0.6868 | 9    | -2.0280 | NO  |       |           |           |         |      |  |
| CLL148TD | chr12 | 111742005 | 111885425 | 1.0203  | 18   | 3.3952  | YES | chr12 | 38503256  | 133779217 | 0.4875  | 8100 |  |
| CLL148TD | chr12 | 111885766 | 112223020 | 0.5195  | 60   | 3.2327  | YES | chr12 | 38503256  | 133779217 | 0.4875  | 8100 |  |
| CLL148TD | chr12 | 112235843 | 112568289 | 0.3750  | 56   | 2.6303  | YES | chr12 | 38503256  | 133779217 | 0.4875  | 8100 |  |
| CLL148TD | chr12 | 112572489 | 112621925 | 0.6489  | 23   | 3.7049  | YES | chr12 | 38503256  | 133779217 | 0.4875  | 8100 |  |
| CLL032TD | chr12 | 112587494 | 112600776 | 0.5154  | 6    | 3.0994  | YES | chr12 | 38453410  | 133779217 | 0.4287  | 8061 |  |
| CLL032TD | chr12 | 112601875 | 112608873 | 1.0082  | 6    | 2.0653  | YES | chr12 | 38453410  | 133779217 | 0.4287  | 8061 |  |
| CLL032TD | chr12 | 112610449 | 112919823 | 0.4221  | 78   | 4.2081  | YES | chr12 | 38453410  | 133779217 | 0.4287  | 8061 |  |
| CLL148TD | chr12 | 112630809 | 112681119 | 0.5656  | 28   | 4.4077  | YES | chr12 | 38503256  | 133779217 | 0.4875  | 8100 |  |
| CLL148TD | chr12 | 112681374 | 113332363 | 0.4260  | 60   | 3.7194  | YES | chr12 | 38503256  | 133779217 | 0.4875  | 8100 |  |
| CLL032TD | chr12 | 112924235 | 122692905 | 0.5547  | 860  | 2.8171  | YES | chr12 | 38453410  | 133779217 | 0.4287  | 8061 |  |
| CLL064TD | chr12 | 113314438 | 113444191 | 0.6062  | 39   | 3.7692  | YES | chr12 | 38448467  | 133779217 | 0.4811  | 8132 |  |
| CLL148TD | chr12 | 113333569 | 113836431 | 0.7490  | 138  | 3.1809  | YES | chr12 | 38503256  | 133779217 | 0.4875  | 8100 |  |
| CLL064TD | chr12 | 113445418 | 113744249 | 0.3388  | 83   | 1.9352  | YES | chr12 | 38448467  | 133779217 | 0.4811  | 8132 |  |
| CLL082TD | chr12 | 113640726 | 123342878 | 0.4468  | 934  | 2.5156  | YES | chr12 | 38448467  | 133779217 | 0.5185  | 8096 |  |
| CLL064TD | chr12 | 113745422 | 120599280 | 0.4941  | 397  | 3.0316  | YES | chr12 | 38448467  | 133779217 | 0.4811  | 8132 |  |
| CLL148TD | chr12 | 113836858 | 120518635 | 0.5528  | 329  | 3.3770  | YES | chr12 | 38503256  | 133779217 | 0.4875  | 8100 |  |
| CLL148TD | chr12 | 120527694 | 122692905 | 0.6787  | 389  | 3.0497  | YES | chr12 | 38503256  | 133779217 | 0.4875  | 8100 |  |
| CLL064TD | chr12 | 120599622 | 133778670 | 0.3937  | 1306 | 2.5881  | YES | chr12 | 38448467  | 133779217 | 0.4811  | 8132 |  |
| CLL166TD | chr12 | 120875920 | 133778670 | 0.5172  | 1237 | 2.9137  | YES | chr12 | 38572477  | 133779217 | 0.3933  | 8121 |  |
| CLL145TD | chr12 | 121861133 | 123048222 | -0.8112 | 223  | -3.0364 | YES | chr12 | 121860338 | 123047826 | -0.7281 | 222  |  |
| CLL148TD | chr12 | 122693224 | 123334540 | 0.4153  | 156  | 3.3940  | YES | chr12 | 38503256  | 133779217 | 0.4875  | 8100 |  |
| CLL032TD | chr12 | 122693224 | 123343348 | 0.3493  | 169  | 3.3913  | YES | chr12 | 38453410  | 133779217 | 0.4287  | 8061 |  |
| CLL275TD | chr12 | 122864866 | 123307879 | 0.3691  | 108  | 2.5509  | YES | chr12 | 37957940  | 133779217 | 0.5145  | 8151 |  |
| CLL275TD | chr12 | 123310932 | 123519038 | 0.7735  | 66   | 3.3556  | YES | chr12 | 37957940  | 133779217 | 0.5145  | 8151 |  |
| CLL148TD | chr12 | 123335274 | 123489730 | 0.8520  | 52   | 2.5528  | YES | chr12 | 38503256  | 133779217 | 0.4875  | 8100 |  |
| CLL032TD | chr12 | 123343937 | 123498331 | 0.8713  | 44   | 1.9784  | YES | chr12 | 38453410  | 133779217 | 0.4287  | 8061 |  |
| CLL082TD | chr12 | 123351608 | 133778670 | 0.4326  | 766  | 2.3501  | YES | chr12 | 38448467  | 133779217 | 0.5185  | 8096 |  |
| CLL005TD | chr12 | 123467064 | 123519038 | 0.9198  | 21   | 3.0206  | YES | chr12 | 38453410  | 133779217 | 0.5251  | 8176 |  |
| CLL148TD | chr12 | 123494360 | 124416451 | 0.5013  | 230  | 3.5119  | YES | chr12 | 38503256  | 133779217 | 0.4875  | 8100 |  |
| CLL032TD | chr12 | 123519038 | 124411155 | 0.4264  | 219  | 3.5414  | YES | chr12 | 38453410  | 133779217 | 0.4287  | 8061 |  |
| CLL275TD | chr12 | 123637065 | 124333232 | 0.4476  | 185  | 2.7007  | YES | chr12 | 37957940  | 133779217 | 0.5145  | 8151 |  |
| CLL005TD | chr12 | 123637065 | 133778670 | 0.5207  | 744  | 3.1279  | YES | chr12 | 38453410  | 133779217 | 0.5251  | 8176 |  |
| CLL275TD | chr12 | 124335408 | 132627197 | 0.6826  | 393  | 3.8918  | YES | chr12 | 37957940  | 133779217 | 0.5145  | 8151 |  |
| CLL032TD | chr12 | 124412913 | 132853802 | 0.6546  | 363  | 2.7594  | YES | chr12 | 38453410  | 133779217 | 0.4287  | 8061 |  |
| CLL148TD | chr12 | 124417847 | 125621158 | 0.8143  | 94   | 3.0156  | YES | chr12 | 38503256  | 133779217 | 0.4875  | 8100 |  |
| CLL148TD | chr12 | 125626556 | 131484883 | 0.5369  | 112  | 3.4582  | YES | chr12 | 38503256  | 133779217 | 0.4875  | 8100 |  |
| CLL148TD | chr12 | 131487280 | 133245211 | 0.8207  | 192  | 3.2388  | YES | chr12 | 38503256  | 133779217 | 0.4875  | 8100 |  |
| CLL282TD | chr12 | 132394763 | 133778670 | 0.3822  | 244  | 2.3364  | YES | chr12 | 37957940  | 133779217 | 0.4997  | 8113 |  |
| CLL275TD | chr12 | 132630096 | 133196573 | 1.0447  | 27   | 3.4510  | YES | chr12 | 37957940  | 133779217 | 0.5145  | 8151 |  |

|          |       |           |           |         |      |         |     |       |           |           |         |      |          |
|----------|-------|-----------|-----------|---------|------|---------|-----|-------|-----------|-----------|---------|------|----------|
| CLL032TD | chr12 | 133196802 | 133423582 | 0.5995  | 98   | 2.3829  | YES | chr12 | 38453410  | 133779217 | 0.4287  | 8061 |          |
| CLL275TD | chr12 | 133196802 | 133778670 | 0.5861  | 137  | 3.5875  | YES | chr12 | 37957940  | 133779217 | 0.5145  | 8151 |          |
| CLL148TD | chr12 | 133245340 | 133454130 | 0.6819  | 72   | 3.1765  | YES | chr12 | 38503256  | 133779217 | 0.4875  | 8100 |          |
| CLL032TD | chr12 | 133424615 | 133778670 | 0.3800  | 37   | 3.4107  | YES | chr12 | 38453410  | 133779217 | 0.4287  | 8061 |          |
| CLL148TD | chr12 | 133501953 | 133778670 | 0.3676  | 28   | 3.2662  | YES | chr12 | 38503256  | 133779217 | 0.4875  | 8100 |          |
| CLL141TD | chr13 | 20978234  | 21729228  | -0.9476 | 72   | -3.7309 | YES | chr13 | 20906308  | 22405579  | -0.9435 | 111  |          |
| CLL141TD | chr13 | 21746410  | 22275313  | -0.9187 | 34   | -3.4073 | YES | chr13 | 20906308  | 22405579  | -0.9435 | 111  |          |
| CLL146TD | chr13 | 34837007  | 70681587  | -0.9006 | 1217 | -3.7898 | YES | chr13 | 34752795  | 70922816  | -0.7916 | 1217 |          |
| CLL110TD | chr13 | 38923997  | 52293288  | -0.7827 | 764  | -3.3982 | YES | chr13 | 38733308  | 53483162  | -0.7936 | 919  |          |
| CLL194TD | chr13 | 41485871  | 44476730  | -0.9826 | 204  | -3.6015 | YES | chr13 | 41434188  | 52354921  | -0.9053 | 667  |          |
| CLL321TD | chr13 | 41635750  | 50510258  | -0.8777 | 585  | -3.9145 | YES | chr13 | 41561808  | 52237129  | -0.8764 | 652  |          |
| CLL194TD | chr13 | 44734557  | 52351166  | -0.9436 | 461  | -3.6848 | YES | chr13 | 41434188  | 52354921  | -0.9053 | 667  |          |
| CLL189TD | chr13 | 46357452  | 80910886  | -0.5062 | 931  | -2.0621 | YES | chr13 | 46334152  | 82152329  | -0.4679 | 931  |          |
| CLL192TD | chr13 | 46917419  | 51522103  | -0.7799 | 254  | -3.9047 | YES | chr13 | 46913252  | 51522316  | -0.7334 | 254  |          |
| CLL141TD | chr13 | 46917419  | 73428183  | -0.9020 | 596  | -3.6167 | YES | chr13 | 46915859  | 73435221  | -0.8720 | 596  |          |
| CLL188TD | chr13 | 47297320  | 50505091  | -1.0137 | 196  | -3.8394 | YES | chr13 | 47295273  | 53161169  | -0.9120 | 395  |          |
| CLL182TD | chr13 | 48517452  | 50502017  | -0.4449 | 181  | -2.1704 | NO  |       |           |           |         |      | SUBCLONE |
| CLL027TD | chr13 | 48517452  | 51527990  | -0.8010 | 201  | -3.5821 | YES | chr13 | 48501167  | 51571802  | -0.8240 | 202  |          |
| CLL030TD | chr13 | 48517452  | 53016485  | -0.8124 | 355  | -3.4252 | YES | chr13 | 47563657  | 53040052  | -0.8205 | 363  |          |
| CLL267TD | chr13 | 48517452  | 62334304  | -0.8706 | 462  | -3.6216 | YES | chr13 | 47507142  | 62915894  | -0.7481 | 462  |          |
| CLL083TD | chr13 | 48517452  | 64417580  | -0.9101 | 470  | -3.6942 | YES | chr13 | 47946084  | 65226370  | -0.8482 | 470  |          |
| CLL272TD | chr13 | 48570947  | 49822963  | -0.9082 | 88   | -3.8393 | YES | chr13 | 48569200  | 51600231  | -0.6386 | 204  |          |
| CLL172TD | chr13 | 48651240  | 50366552  | -0.7516 | 163  | -3.3188 | YES | chr13 | 48629192  | 50438731  | -0.7113 | 163  |          |
| CLL279TD | chr13 | 48708461  | 52863912  | -0.8923 | 318  | -3.8150 | YES | chr13 | 48703533  | 52885510  | -0.8388 | 318  |          |
| CLL181TD | chr13 | 48827887  | 50505091  | -0.3781 | 159  | -1.6611 | YES | chr13 | 48740315  | 52314639  | -0.4214 | 230  |          |
| CLL186TD | chr13 | 48827887  | 52701409  | -0.5998 | 293  | -2.8210 | YES | chr13 | 48740315  | 52707274  | -0.5630 | 293  |          |
| CLL184TD | chr13 | 48881358  | 57747585  | -0.8533 | 391  | -3.6616 | YES | chr13 | 48858287  | 58200326  | -0.7885 | 391  |          |
| CLL117TD | chr13 | 48916672  | 50495604  | -0.4543 | 149  | -2.1713 | YES | chr13 | 48909694  | 51700648  | -0.5751 | 185  |          |
| CLL053TD | chr13 | 48941624  | 51603719  | -0.5964 | 179  | -2.8316 | YES | chr13 | 48919079  | 51700648  | -0.6254 | 186  |          |
| CLL013TD | chr13 | 49760048  | 50123538  | -0.6573 | 62   | -2.9704 | YES | chr13 | 49759884  | 51581416  | -0.7134 | 121  |          |
| CLL157TD | chr13 | 49822963  | 51594513  | -0.9695 | 114  | -4.0961 | YES | chr13 | 49813764  | 51593526  | -0.8986 | 113  |          |
| CLL013TD | chr13 | 50125412  | 50366552  | -0.9114 | 30   | -3.3388 | YES | chr13 | 49759884  | 51581416  | -0.7134 | 121  |          |
| CLL144TD | chr13 | 50366552  | 51508957  | -0.7432 | 22   | -2.7499 | YES | chr13 | 50389525  | 51568793  | -0.7145 | 27   |          |
| CLL272TD | chr13 | 50366552  | 51517433  | -0.9001 | 25   | -3.8312 | YES | chr13 | 48569200  | 51600231  | -0.6386 | 204  |          |
| CLL013TD | chr13 | 50465395  | 51581081  | -0.6070 | 29   | -2.9127 | YES | chr13 | 49759884  | 51581416  | -0.7134 | 121  |          |
| CLL280TD | chr13 | 50489187  | 51397432  | -1.0093 | 15   | -3.9806 | YES | chr13 | 50432170  | 51645041  | -0.8038 | 39   |          |
| CLL323TD | chr13 | 50495604  | 51417260  | -0.6220 | 16   | -3.3454 | YES | chr13 | 50569953  | 51483819  | -0.6924 | 13   |          |
| CLL117TD | chr13 | 50502017  | 51608069  | -0.7927 | 36   | -4.1792 | YES | chr13 | 48909694  | 51700648  | -0.5751 | 185  |          |
| CLL182TD | chr13 | 50505091  | 51527990  | -1.0074 | 24   | -3.9775 | NO  |       |           |           |         |      | SUBCLONE |
| CLL172TD | chr13 | 50510258  | 50747127  | -1.9621 | 10   | -6.6197 | YES | chr13 | 50506691  | 51479294  | -1.7397 | 13   |          |
| CLL040TD | chr13 | 50586025  | 51287304  | -4.5222 | 10   | -8.5208 | YES | chr13 | 50557545  | 51372504  | -2.1297 | 10   |          |
| CLL159TD | chr13 | 50586025  | 51287304  | -1.5641 | 10   | -5.6372 | YES | chr13 | 50557545  | 51375978  | -1.2829 | 10   |          |
| CLL181TD | chr13 | 50586025  | 51416933  | -0.9525 | 12   | -3.8231 | YES | chr13 | 48740315  | 52314639  | -0.4214 | 230  |          |
| CLL188TD | chr13 | 50586025  | 51416933  | -1.4858 | 12   | -5.3196 | YES | chr13 | 47295273  | 53161169  | -0.9120 | 395  |          |
| CLL274TD | chr13 | 50586025  | 51416933  | -2.2354 | 12   | -6.4344 | YES | chr13 | 50569953  | 51469532  | -1.6291 | 12   |          |
| CLL174TD | chr13 | 50586025  | 51417260  | -3.6344 | 13   | -7.3596 | YES | chr13 | 50520557  | 51527535  | -2.6065 | 21   |          |
| CLL017TD | chr13 | 50586025  | 51504796  | -0.8498 | 15   | -3.8226 | NO  |       |           |           |         |      | SUBCLONE |
| CLL136TD | chr13 | 50586025  | 51504796  | -0.8482 | 15   | -3.0379 | YES | chr13 | 50516370  | 51526121  | -0.7490 | 20   |          |
| CLL052TD | chr13 | 50586025  | 51523559  | -0.4579 | 20   | -1.9180 | YES | chr13 | 50559222  | 51551357  | -0.4880 | 22   |          |
| CLL321TD | chr13 | 50586025  | 51530431  | -4.9730 | 23   | -7.7786 | YES | chr13 | 41561808  | 52237129  | -0.8764 | 652  |          |
| CLL041TD | chr13 | 50623062  | 51501518  | -0.6784 | 11   | -2.7956 | YES | chr13 | 50608201  | 51501750  | -0.6374 | 11   |          |
| CLL322TD | chr13 | 50623062  | 51530431  | -3.5042 | 20   | -6.8704 | YES | chr13 | 50616393  | 51553735  | -2.4118 | 20   |          |
| CLL172TD | chr13 | 51287304  | 51527990  | -1.3256 | 12   | -4.5739 | YES | chr13 | 50506691  | 51479294  | -1.7397 | 13   |          |
| CLL040TD | chr13 | 51397432  | 51530431  | -0.9708 | 12   | -3.9321 | YES | chr13 | 51377832  | 51540139  | -0.3716 | 12   |          |
| CLL280TD | chr13 | 51416933  | 51608069  | -0.5143 | 23   | -2.2064 | YES | chr13 | 50432170  | 51645041  | -0.8038 | 39   |          |
| CLL174TD | chr13 | 51501518  | 51527990  | -1.4807 | 9    | -5.5631 | YES | chr13 | 50520557  | 51527535  | -2.6065 | 21   |          |
| CLL181TD | chr13 | 51501518  | 52293288  | -0.3178 | 57   | -1.7038 | YES | chr13 | 48740315  | 52314639  | -0.4214 | 230  |          |
| CLL188TD | chr13 | 51501518  | 53096849  | -0.9868 | 175  | -3.9234 | YES | chr13 | 47295273  | 53161169  | -0.9120 | 395  |          |
| CLL172TD | chr13 | 51530431  | 51805409  | -1.0700 | 14   | -6.0542 | NO  |       |           |           |         |      | SUBCLONE |
| CLL182TD | chr13 | 51530431  | 76444992  | -0.4358 | 437  | -2.0838 | NO  |       |           |           |         |      | SUBCLONE |
| CLL272TD | chr13 | 51580936  | 51599401  | -0.8796 | 8    | -5.9200 | YES | chr13 | 48569200  | 51600231  | -0.6386 | 204  |          |
| CLL321TD | chr13 | 51580936  | 52234705  | -0.9581 | 44   | -4.0771 | YES | chr13 | 41561808  | 52237129  | -0.8764 | 652  |          |
| CLL110TD | chr13 | 52301809  | 52538968  | -1.1243 | 33   | -3.7414 | YES | chr13 | 38733308  | 53483162  | -0.7936 | 919  |          |
| CLL110TD | chr13 | 52542541  | 53419543  | -0.7604 | 122  | -3.0683 | YES | chr13 | 38733308  | 53483162  | -0.7936 | 919  |          |
| CLL030TD | chr13 | 53030639  | 53039808  | -0.8560 | 6    | -3.4674 | YES | chr13 | 47563657  | 53040052  | -0.8205 | 363  |          |
| CLL188TD | chr13 | 53103339  | 53153470  | -3.9766 | 9    | -1.7531 | YES | chr13 | 47295273  | 53161169  | -0.9120 | 395  |          |
| CLL110TD | chr13 | 101294454 | 101712124 | -0.4274 | 9    | -1.6181 | NO  |       |           |           |         |      |          |
| CLL274TD | chr13 | 101308588 | 101717714 | 0.5984  | 10   | 1.6318  | NO  |       |           |           |         |      |          |
| CLL023TD | chr14 | 19558957  | 19585260  | 0.6538  | 8    | 1.6166  | NO  |       |           |           |         |      |          |
| CLL141TD | chr14 | 20697540  | 20764486  | -0.7731 | 7    | -2.4436 | YES | chr14 | 20760146  | 20765549  | -0.9383 | 4    |          |
| CLL155TD | chr14 | 23991120  | 25901187  | -0.4691 | 417  | -1.6420 | NO  |       |           |           |         |      | SUBCLONE |
| CLL155TD | chr14 | 38306651  | 39839695  | -0.3130 | 86   | -1.8063 | NO  |       |           |           |         |      | SUBCLONE |
| CLL141TD | chr14 | 58598184  | 58796653  | -0.9766 | 37   | -3.7360 | YES | chr14 | 58585617  | 58808196  | -0.9673 | 37   |          |
| CLL191TD | chr14 | 73719292  | 73733424  | 0.4290  | 16   | 1.6628  | NO  |       |           |           |         |      |          |
| CLL274TD | chr14 | 77718066  | 77745021  | 0.9966  | 8    | 2.0994  | NO  |       |           |           |         |      |          |
| CLL191TD | chr14 | 105617586 | 105676846 | 0.9094  | 9    | 1.9495  | NO  |       |           |           |         |      | IGH      |
| CLL048TD | chr14 | 106130944 | 106174668 | -0.3578 | 8    | -1.8234 | NO  |       |           |           |         |      | IGH      |
| CLL052TD | chr14 | 106130944 | 106330387 | -1.7185 | 36   | -3.0434 | YES | chr14 | 106168179 | 107015590 | -1.4376 | 124  |          |

|          |       |           |           |          |    |         |     |       |           |           |         |     |     |
|----------|-------|-----------|-----------|----------|----|---------|-----|-------|-----------|-----------|---------|-----|-----|
| CLL159TD | chr14 | 106130944 | 106329377 | -1.3216  | 37 | -2.2826 | YES | chr14 | 106168179 | 106410678 | -0.7433 | 62  |     |
| CLL173TD | chr14 | 106133121 | 106237415 | -1.3629  | 24 | -2.6304 | NO  |       |           |           |         |     | IGH |
| CLL144TD | chr14 | 106174088 | 106209080 | -1.2127  | 10 | -2.5395 | YES | chr14 | 106168179 | 106777490 | -0.9957 | 96  |     |
| CLL032TD | chr14 | 106188116 | 106209080 | -0.7952  | 7  | -2.5989 | NO  |       |           |           |         |     | IGH |
| CLL045TD | chr14 | 106188116 | 106209080 | -0.9708  | 8  | -2.1875 | NO  |       |           |           |         |     | IGH |
| CLL276TD | chr14 | 106188116 | 106329377 | -1.0992  | 28 | -1.9216 | YES | chr14 | 106252596 | 106303121 | -0.8381 | 0   |     |
| CLL048TD | chr14 | 106188116 | 106366443 | -3.4155  | 37 | -3.7502 | YES | chr14 | 106252596 | 106561323 | -1.9852 | 51  |     |
| CLL192TD | chr14 | 106188116 | 106346841 | -4.7516  | 37 | -3.9438 | YES | chr14 | 106252596 | 107208787 | -0.6230 | 137 |     |
| CLL145TD | chr14 | 106204080 | 106209080 | -2.6671  | 6  | -4.4185 | YES | chr14 | 106168179 | 107083152 | -0.6834 | 141 |     |
| CLL186TD | chr14 | 106204080 | 106237415 | -5.5469  | 15 | -4.5364 | YES | chr14 | 106168179 | 106811048 | -1.0292 | 109 |     |
| CLL322TD | chr14 | 106204080 | 106329987 | -1.0533  | 28 | -1.6795 | YES | chr14 | 106252596 | 106411088 | -0.9570 | 45  |     |
| CLL009TD | chr14 | 106232232 | 106237415 | -3.0135  | 9  | -4.1107 | NO  |       |           |           |         |     | IGH |
| CLL090TD | chr14 | 106232232 | 106237415 | -1.0598  | 9  | -2.1099 | NO  |       |           |           |         |     | IGH |
| CLL043TD | chr14 | 106232232 | 106307218 | -2.8044  | 11 | -4.2632 | YES | chr14 | 106252596 | 106829408 | -1.7132 | 88  |     |
| CLL178TD | chr14 | 106232232 | 106321000 | -1.2260  | 17 | -2.4237 | YES | chr14 | 106243009 | 106691076 | -0.9101 | 68  |     |
| CLL017TD | chr14 | 106232232 | 106329377 | -0.9118  | 19 | -2.3284 | YES | chr14 | 106243009 | 106827263 | -1.0022 | 82  |     |
| CLL174TD | chr14 | 106232232 | 106329987 | -0.8755  | 20 | -0.8385 | YES | chr14 | 106243009 | 106322375 | -0.7534 | 9   |     |
| CLL189TD | chr14 | 106232232 | 106329987 | -0.8668  | 20 | -2.0127 | NO  |       |           |           |         |     | IGH |
| CLL280TD | chr14 | 106232232 | 106329987 | -1.0074  | 20 | -2.3658 | YES | chr14 | 106252596 | 106322375 | -0.7332 | 9   |     |
| CLL064TD | chr14 | 106232232 | 106329377 | -0.9631  | 21 | -2.2028 | YES | chr14 | 106252596 | 106779188 | -0.8215 | 83  |     |
| CLL110TD | chr14 | 106232232 | 106330387 | -1.1768  | 21 | -2.5712 | YES | chr14 | 106243009 | 107094934 | -0.7319 | 126 |     |
| CLL197TD | chr14 | 106232232 | 106330387 | -1.0805  | 21 | -1.9559 | YES | chr14 | 106252596 | 106829408 | -0.7154 | 87  |     |
| CLL040TD | chr14 | 106232232 | 106330760 | -1.2225  | 22 | -2.2656 | YES | chr14 | 106243009 | 106827263 | -0.3900 | 88  |     |
| CLL145TD | chr14 | 106232232 | 106330387 | -0.6515  | 22 | -1.9498 | YES | chr14 | 106168179 | 107083152 | -0.6834 | 141 |     |
| CLL045TD | chr14 | 106232232 | 106330760 | -3.0340  | 24 | -3.6521 | YES | chr14 | 106243009 | 107179117 | -0.7934 | 132 |     |
| CLL144TD | chr14 | 106232232 | 106369421 | -6.6731  | 36 | -3.8056 | YES | chr14 | 106168179 | 106777490 | -0.9957 | 96  |     |
| CLL191TD | chr14 | 106235554 | 106329987 | -0.6049  | 18 | -1.7845 | YES | chr14 | 106252596 | 107012899 | -0.8324 | 107 |     |
| CLL136TD | chr14 | 106237415 | 106329987 | -0.6444  | 11 | -2.3135 | YES | chr14 | 106252596 | 106303121 | -0.7909 | 0   |     |
| CLL184TD | chr14 | 106237415 | 106330387 | -1.0780  | 15 | -1.6901 | YES | chr14 | 106257663 | 107048607 | -0.8605 | 120 |     |
| CLL172TD | chr14 | 106304633 | 106321986 | -1.0642  | 10 | -2.3240 | YES | chr14 | 106252596 | 106322375 | -0.7866 | 10  |     |
| CLL008TD | chr14 | 106304633 | 106329987 | -0.7630  | 12 | -2.1526 | YES | chr14 | 106243009 | 107167303 | -0.8026 | 131 |     |
| CLL009TD | chr14 | 106304633 | 106330387 | -0.8045  | 12 | -1.7481 | YES | chr14 | 106243009 | 106734526 | -0.7843 | 79  |     |
| CLL278TD | chr14 | 106304633 | 106329987 | -0.8399  | 12 | -1.6766 | YES | chr14 | 106252596 | 106691076 | -0.6082 | 70  |     |
| CLL282TD | chr14 | 106304633 | 106329987 | -0.7720  | 13 | -1.9926 | YES | chr14 | 106263491 | 106322375 | -0.8652 | 11  |     |
| CLL290TD | chr14 | 106304633 | 106329987 | -1.0331  | 13 | -2.3069 | YES | chr14 | 106243009 | 106561323 | -0.8239 | 55  |     |
| CLL186TD | chr14 | 106304633 | 106370309 | -9.9055  | 33 | -3.6032 | YES | chr14 | 106168179 | 106811048 | -1.0292 | 109 |     |
| CLL173TD | chr14 | 106304633 | 106405971 | -9.9367  | 45 | -3.6496 | YES | chr14 | 106252596 | 106831538 | -1.9681 | 92  |     |
| CLL043TD | chr14 | 106308206 | 106405971 | -3.4445  | 41 | -3.2766 | YES | chr14 | 106252596 | 106829408 | -1.7132 | 88  |     |
| CLL100TD | chr14 | 106329377 | 106346841 | -9.0224  | 8  | -2.8042 | YES | chr14 | 106330168 | 106345551 | -3.3787 | 5   |     |
| CLL279TD | chr14 | 106329377 | 106359349 | -3.3636  | 15 | -2.5594 | YES | chr14 | 106330168 | 106345551 | -3.1367 | 4   |     |
| CLL172TD | chr14 | 106329377 | 106379028 | -9.7387  | 26 | -2.9754 | YES | chr14 | 106330168 | 106538621 | -2.1448 | 40  |     |
| CLL274TD | chr14 | 106329377 | 106405971 | -9.7964  | 28 | -3.4616 | YES | chr14 | 106330168 | 106610162 | -1.1555 | 46  |     |
| CLL175TD | chr14 | 106329377 | 106478456 | -9.7055  | 38 | -3.5220 | YES | chr14 | 106330168 | 107083152 | -2.5047 | 110 |     |
| CLL124TD | chr14 | 106329377 | 106714578 | -0.7779  | 63 | -1.8724 | YES | chr14 | 106330168 | 106724962 | -0.5153 | 61  |     |
| CLL064TD | chr14 | 106329987 | 106356996 | -7.6821  | 12 | -2.8722 | YES | chr14 | 106252596 | 106779188 | -0.8215 | 83  |     |
| CLL159TD | chr14 | 106329987 | 106360313 | -8.1293  | 12 | -3.0692 | YES | chr14 | 106168179 | 106410678 | -0.7433 | 62  |     |
| CLL041TD | chr14 | 106329987 | 106370493 | -1.7754  | 20 | -2.1101 | YES | chr14 | 106330168 | 106524457 | -0.7176 | 39  |     |
| CLL141TD | chr14 | 106329987 | 106375713 | -9.9491  | 20 | -3.1210 | YES | chr14 | 106330168 | 106345551 | -4.2148 | 3   |     |
| CLL023TD | chr14 | 106329987 | 106379028 | -7.5893  | 25 | -2.8851 | YES | chr14 | 106320095 | 107169498 | -0.7311 | 122 |     |
| CLL277TD | chr14 | 106329987 | 106378065 | -9.7456  | 25 | -2.9875 | YES | chr14 | 106330168 | 106345551 | -3.9939 | 4   |     |
| CLL136TD | chr14 | 106330387 | 106357506 | -4.4873  | 8  | -2.6532 | YES | chr14 | 106331756 | 106826216 | -1.8593 | 66  |     |
| CLL027TD | chr14 | 106330387 | 106356996 | -8.9239  | 11 | -2.8816 | YES | chr14 | 106320095 | 107182803 | -0.8139 | 131 |     |
| CLL083TD | chr14 | 106330387 | 106357506 | -8.6562  | 12 | -2.8731 | YES | chr14 | 106330168 | 106345551 | -3.4146 | 5   |     |
| CLL171TD | chr14 | 106330387 | 106363769 | -3.8134  | 12 | -2.9225 | YES | chr14 | 106330168 | 107083152 | -0.7604 | 109 |     |
| CLL178TD | chr14 | 106330387 | 106363769 | -9.5637  | 12 | -3.1116 | YES | chr14 | 106243009 | 106691076 | -0.9101 | 68  |     |
| CLL267TD | chr14 | 106330387 | 106357506 | -4.1548  | 12 | -2.6611 | YES | chr14 | 106331756 | 106345551 | -2.5360 | 1   |     |
| CLL278TD | chr14 | 106330387 | 106366443 | -5.0056  | 14 | -2.8969 | YES | chr14 | 106252596 | 106691076 | -0.6082 | 70  |     |
| CLL189TD | chr14 | 106330387 | 106369421 | -8.2337  | 16 | -2.9375 | YES | chr14 | 106330168 | 106918315 | -1.3986 | 83  |     |
| CLL273TD | chr14 | 106330387 | 106373023 | -4.3847  | 20 | -2.5511 | YES | chr14 | 106330168 | 106877502 | -0.7216 | 84  |     |
| CLL290TD | chr14 | 106330387 | 106376217 | -9.1349  | 20 | -3.0638 | YES | chr14 | 106243009 | 106561323 | -0.8239 | 55  |     |
| CLL032TD | chr14 | 106330387 | 106379028 | -6.9021  | 21 | -2.9824 | YES | chr14 | 106330168 | 106345551 | -3.2441 | 3   |     |
| CLL266TD | chr14 | 106330387 | 106370493 | -7.8500  | 21 | -2.9798 | YES | chr14 | 106330168 | 106345551 | -3.2449 | 5   |     |
| CLL181TD | chr14 | 106330387 | 106380172 | -10.0000 | 24 | -3.0424 | YES | chr14 | 106330168 | 106610162 | -0.9352 | 50  |     |
| CLL280TD | chr14 | 106330387 | 106388010 | -9.9417  | 26 | -3.1735 | YES | chr14 | 106330168 | 107012899 | -2.3117 | 97  |     |
| CLL017TD | chr14 | 106330387 | 106405971 | -8.3142  | 27 | -3.4088 | YES | chr14 | 106243009 | 106827263 | -1.0022 | 82  |     |
| CLL322TD | chr14 | 106330387 | 106405586 | -9.6251  | 31 | -3.1455 | YES | chr14 | 106252596 | 106411088 | -0.9570 | 45  |     |
| CLL007TD | chr14 | 106330387 | 106494494 | -3.3737  | 37 | -3.1163 | YES | chr14 | 106330168 | 106517682 | -2.0845 | 37  |     |
| CLL019TD | chr14 | 106330387 | 106579220 | -9.5583  | 46 | -3.9811 | YES | chr14 | 106330168 | 106724962 | -1.7993 | 61  |     |
| CLL082TD | chr14 | 106330387 | 106816090 | -8.1022  | 71 | -4.2468 | YES | chr14 | 106331756 | 106345551 | -3.3155 | 0   |     |
| CLL054TD | chr14 | 106330760 | 106351843 | -7.6209  | 7  | -3.0294 | YES | chr14 | 106331756 | 106345551 | -3.7211 | 0   |     |
| CLL275TD | chr14 | 106330760 | 106351843 | -10.0000 | 8  | -2.9762 | YES | chr14 | 106330168 | 106610162 | -0.8714 | 51  |     |
| CLL009TD | chr14 | 106330760 | 106357506 | -3.3954  | 11 | -2.6653 | YES | chr14 | 106243009 | 106734526 | -0.7843 | 79  |     |
| CLL063TD | chr14 | 106330760 | 106360313 | -6.0694  | 12 | -2.8341 | YES | chr14 | 106331756 | 106345551 | -3.8480 | 0   |     |
| CLL155TD | chr14 | 106330760 | 106360313 | -10.0000 | 13 | -3.0219 | YES | chr14 | 106331756 | 106345551 | -3.7543 | 1   |     |
| CLL197TD | chr14 | 106330760 | 106360313 | -8.3290  | 13 | -2.9741 | YES | chr14 | 106252596 | 106829408 | -0.7154 | 87  |     |
| CLL157TD | chr14 | 106330760 | 106363769 | -9.9654  | 14 | -3.0537 | YES | chr14 | 106326556 | 106526710 | -0.9814 | 43  |     |
| CLL038TD | chr14 | 106330760 | 106369421 | -2.6953  | 15 | -2.5613 | YES | chr14 | 106330168 | 106561323 | -1.6025 | 40  |     |
| CLL044TD | chr14 | 106330760 | 106369421 | -7.1372  | 17 | -2.9033 | YES | chr14 | 106331756 | 106345551 | -4.4615 | 1   |     |

|          |       |           |           |          |     |         |     |       |           |           |         |     |     |
|----------|-------|-----------|-----------|----------|-----|---------|-----|-------|-----------|-----------|---------|-----|-----|
| CLL148TD | chr14 | 106330760 | 106369421 | -6.0154  | 17  | -2.9558 | YES | chr14 | 106330168 | 106526710 | -0.9501 | 39  |     |
| CLL152TD | chr14 | 106330760 | 106369421 | -5.9502  | 18  | -2.8870 | YES | chr14 | 106330168 | 107287646 | -0.6983 | 134 |     |
| CLL170TD | chr14 | 106330760 | 106370309 | -9.9163  | 18  | -3.1611 | YES | chr14 | 106330168 | 107210901 | -0.7360 | 125 |     |
| CLL145TD | chr14 | 106330760 | 106379028 | -5.2664  | 20  | -2.9188 | YES | chr14 | 106168179 | 107083152 | -0.6834 | 141 |     |
| CLL053TD | chr14 | 106330760 | 106379028 | -7.8069  | 23  | -2.9223 | YES | chr14 | 106330168 | 106345551 | -3.5836 | 3   |     |
| CLL166TD | chr14 | 106330760 | 106380172 | -9.9538  | 24  | -3.0116 | YES | chr14 | 106331756 | 106345551 | -2.2126 | 0   |     |
| CLL117TD | chr14 | 106330760 | 106386891 | -8.6995  | 26  | -2.9833 | YES | chr14 | 106331756 | 106345551 | -3.5884 | 0   |     |
| CLL042TD | chr14 | 106330760 | 106478072 | -1.5875  | 27  | -3.1102 | YES | chr14 | 106330168 | 106852841 | -0.5597 | 74  |     |
| CLL013TD | chr14 | 106330760 | 106453023 | -9.2941  | 31  | -3.5583 | YES | chr14 | 106330168 | 106877502 | -0.8658 | 85  |     |
| CLL184TD | chr14 | 106330760 | 106405971 | -6.9407  | 31  | -3.2062 | YES | chr14 | 106257663 | 107048607 | -0.8605 | 120 |     |
| CLL323TD | chr14 | 106330760 | 106471216 | -8.5546  | 34  | -3.5535 | YES | chr14 | 106330168 | 106691076 | -0.8079 | 62  |     |
| CLL052TD | chr14 | 106330760 | 106586504 | -3.5947  | 42  | -3.8748 | YES | chr14 | 106168179 | 107015590 | -1.4376 | 124 |     |
| CLL049TD | chr14 | 106330760 | 106552646 | -4.2708  | 43  | -3.4485 | YES | chr14 | 106330168 | 106993731 | -0.8750 | 98  |     |
| CLL020TD | chr14 | 106331373 | 106351843 | -9.4122  | 7   | -2.8086 | YES | chr14 | 106330168 | 106786127 | -0.7892 | 67  |     |
| CLL319TD | chr14 | 106331373 | 106361449 | -10.0000 | 12  | -3.0189 | YES | chr14 | 106331756 | 106345551 | -2.6057 | 1   |     |
| CLL270TD | chr14 | 106331373 | 106370493 | -9.9659  | 16  | -3.0874 | YES | chr14 | 106331756 | 106345551 | -4.5472 | 0   |     |
| CLL005TD | chr14 | 106331373 | 106370309 | -9.2759  | 18  | -3.0124 | YES | chr14 | 106330168 | 107182803 | -0.7506 | 120 |     |
| CLL030TD | chr14 | 106331373 | 106376217 | -3.5610  | 18  | -2.7810 | YES | chr14 | 106331756 | 106345551 | -3.1174 | 0   |     |
| CLL182TD | chr14 | 106331373 | 106380172 | -9.8129  | 23  | -2.9438 | YES | chr14 | 106330168 | 107218278 | -0.8158 | 125 |     |
| CLL272TD | chr14 | 106331581 | 106380172 | -9.9266  | 21  | -2.9896 | YES | chr14 | 106330168 | 107081716 | -0.9841 | 111 |     |
| CLL029TD | chr14 | 106331581 | 106386891 | -9.9249  | 27  | -2.9546 | YES | chr14 | 106330168 | 107048607 | -1.0459 | 109 |     |
| CLL006TD | chr14 | 106346841 | 106356996 | -4.5195  | 6   | -2.8648 | YES | chr14 | 106330168 | 106526710 | -1.0101 | 40  |     |
| CLL146TD | chr14 | 106346841 | 106357506 | -9.1811  | 7   | -3.0148 | YES | chr14 | 106354195 | 106517682 | -0.5970 | 28  |     |
| CLL090TD | chr14 | 106346841 | 106370309 | -3.8011  | 14  | -2.9557 | YES | chr14 | 106330168 | 106724962 | -1.5966 | 62  |     |
| CLL110TD | chr14 | 106346841 | 106379028 | -3.7387  | 21  | -2.7510 | YES | chr14 | 106243009 | 107094934 | -0.7319 | 126 |     |
| CLL174TD | chr14 | 106346841 | 106386891 | -9.9147  | 25  | -3.0002 | YES | chr14 | 106330168 | 106724962 | -2.2069 | 66  |     |
| CLL045TD | chr14 | 106347345 | 106357506 | -3.1267  | 6   | -2.6902 | YES | chr14 | 106243009 | 107179117 | -0.7934 | 132 |     |
| CLL100TD | chr14 | 106347345 | 106357506 | -3.3141  | 6   | -2.6621 | NO  |       |           |           |         |     | IGH |
| CLL040TD | chr14 | 106347345 | 106361449 | -8.7600  | 10  | -3.1893 | YES | chr14 | 106243009 | 106827263 | -0.3900 | 88  |     |
| CLL022TD | chr14 | 106347345 | 106375713 | -4.1559  | 17  | -2.9214 | NO  |       |           |           |         |     | IGH |
| CLL192TD | chr14 | 106347345 | 107283143 | -0.9134  | 123 | -2.2682 | YES | chr14 | 106252596 | 107208787 | -0.6230 | 137 |     |
| CLL194TD | chr14 | 106349710 | 106366443 | -7.1575  | 8   | -3.2879 | YES | chr14 | 106354195 | 106453838 | -0.6072 | 18  |     |
| CLL282TD | chr14 | 106349710 | 106405971 | -9.7542  | 21  | -3.6324 | YES | chr14 | 106330168 | 106411088 | -2.6317 | 27  |     |
| CLL008TD | chr14 | 106349710 | 106518770 | -0.9451  | 35  | -1.7780 | YES | chr14 | 106243009 | 107167303 | -0.8026 | 131 |     |
| CLL188TD | chr14 | 106349710 | 106714578 | -0.9977  | 54  | -2.2479 | YES | chr14 | 106330168 | 106723316 | -0.7276 | 59  |     |
| CLL054TD | chr14 | 106354362 | 106405971 | -1.2861  | 23  | -1.9737 | YES | chr14 | 106354195 | 106411088 | -0.5840 | 23  |     |
| CLL321TD | chr14 | 106354362 | 106518770 | -1.4273  | 32  | -1.9369 | YES | chr14 | 106330168 | 107169498 | -0.7248 | 117 |     |
| CLL020TD | chr14 | 106354362 | 106780862 | -1.0163  | 58  | -2.0027 | YES | chr14 | 106330168 | 106786127 | -0.7892 | 67  |     |
| CLL006TD | chr14 | 106357506 | 106368457 | -9.8312  | 6   | -3.1710 | YES | chr14 | 106330168 | 106526710 | -1.0101 | 40  |     |
| CLL027TD | chr14 | 106357506 | 106518770 | -1.3217  | 30  | -2.1360 | YES | chr14 | 106320095 | 107182803 | -0.8139 | 131 |     |
| CLL064TD | chr14 | 106357506 | 106518770 | -0.7827  | 30  | -2.0012 | YES | chr14 | 106252596 | 106779188 | -0.8215 | 83  |     |
| CLL045TD | chr14 | 106360313 | 106369421 | -4.3540  | 6   | -2.7719 | YES | chr14 | 106243009 | 107179117 | -0.7934 | 132 |     |
| CLL136TD | chr14 | 106360313 | 106388010 | -9.8824  | 13  | -3.3466 | YES | chr14 | 106331756 | 106826216 | -1.8593 | 66  |     |
| CLL146TD | chr14 | 106360313 | 106518370 | -0.8627  | 26  | -1.9291 | YES | chr14 | 106354195 | 106517682 | -0.5970 | 28  |     |
| CLL083TD | chr14 | 106360313 | 106518770 | -1.0274  | 29  | -2.2072 | NO  |       |           |           |         |     | IGH |
| CLL009TD | chr14 | 106360313 | 106714578 | -0.7942  | 52  | -1.7129 | YES | chr14 | 106243009 | 106734526 | -0.7843 | 79  |     |
| CLL267TD | chr14 | 106360313 | 107035079 | -0.7080  | 88  | -2.3445 | NO  |       |           |           |         |     | IGH |
| CLL155TD | chr14 | 106363769 | 106373023 | -2.2913  | 8   | -2.0558 | YES | chr14 | 106354195 | 106411088 | -0.5768 | 21  |     |
| CLL159TD | chr14 | 106363769 | 106471216 | -1.3557  | 21  | -1.9185 | YES | chr14 | 106168179 | 106410678 | -0.7433 | 62  |     |
| CLL040TD | chr14 | 106363769 | 106518770 | -0.9156  | 28  | -1.6188 | YES | chr14 | 106243009 | 106827263 | -0.3900 | 88  |     |
| CLL197TD | chr14 | 106363769 | 106829941 | -0.9973  | 64  | -1.8048 | YES | chr14 | 106252596 | 106829408 | -0.7154 | 87  |     |
| CLL171TD | chr14 | 106366443 | 107078725 | -1.0207  | 97  | -2.6198 | YES | chr14 | 106330168 | 107083152 | -0.7604 | 109 |     |
| CLL194TD | chr14 | 106366949 | 106453023 | -0.8559  | 13  | -2.6472 | YES | chr14 | 106354195 | 106453838 | -0.6072 | 18  |     |
| CLL278TD | chr14 | 106366949 | 106518770 | -1.0271  | 24  | -1.7990 | YES | chr14 | 106252596 | 106691076 | -0.6082 | 70  |     |
| CLL100TD | chr14 | 106368457 | 106780862 | -4.2407  | 57  | -4.3246 | YES | chr14 | 106483522 | 106786127 | -2.4305 | 35  |     |
| CLL045TD | chr14 | 106370309 | 106385308 | -2.7030  | 8   | -2.5518 | YES | chr14 | 106243009 | 107179117 | -0.7934 | 132 |     |
| CLL152TD | chr14 | 106370309 | 106518770 | -0.9440  | 23  | -2.0359 | YES | chr14 | 106330168 | 107287646 | -0.6983 | 134 |     |
| CLL005TD | chr14 | 106370493 | 106379028 | -3.6154  | 6   | -2.3208 | YES | chr14 | 106330168 | 107182803 | -0.7506 | 120 |     |
| CLL189TD | chr14 | 106370493 | 106382639 | -3.3170  | 6   | -2.5182 | YES | chr14 | 106330168 | 106918315 | -1.3986 | 83  |     |
| CLL186TD | chr14 | 106373023 | 106380172 | -6.5615  | 6   | -2.7390 | YES | chr14 | 106168179 | 106811048 | -1.0292 | 109 |     |
| CLL178TD | chr14 | 106373023 | 106453023 | -0.9767  | 11  | -2.3714 | YES | chr14 | 106243009 | 106691076 | -0.9101 | 68  |     |
| CLL144TD | chr14 | 106373023 | 106518770 | -0.8355  | 20  | -2.3186 | YES | chr14 | 106168179 | 106777490 | -0.9957 | 96  |     |
| CLL044TD | chr14 | 106373023 | 106518770 | -0.8064  | 21  | -1.9947 | NO  |       |           |           |         |     | IGH |
| CLL148TD | chr14 | 106373023 | 106518770 | -0.9540  | 21  | -2.3956 | YES | chr14 | 106330168 | 106526710 | -0.9501 | 39  |     |
| CLL266TD | chr14 | 106373023 | 106518770 | -1.1219  | 22  | -1.9808 | NO  |       |           |           |         |     | IGH |
| CLL048TD | chr14 | 106373023 | 106579220 | -3.9707  | 28  | -4.1558 | YES | chr14 | 106252596 | 106561323 | -1.9852 | 51  |     |
| CLL041TD | chr14 | 106373023 | 106586504 | -0.5401  | 30  | -1.7873 | YES | chr14 | 106330168 | 106524457 | -0.7176 | 39  |     |
| CLL006TD | chr14 | 106373023 | 106667950 | -0.7320  | 41  | -1.9870 | YES | chr14 | 106330168 | 106526710 | -1.0101 | 40  |     |
| CLL270TD | chr14 | 106373023 | 106974717 | -1.1603  | 74  | -2.5990 | NO  |       |           |           |         |     | IGH |
| CLL170TD | chr14 | 106373023 | 107283143 | -0.9525  | 112 | -2.8358 | YES | chr14 | 106330168 | 107210901 | -0.7360 | 125 |     |
| CLL155TD | chr14 | 106375713 | 106405971 | -0.8926  | 9   | -2.1024 | YES | chr14 | 106354195 | 106411088 | -0.5768 | 21  |     |
| CLL273TD | chr14 | 106375713 | 106518770 | -0.7708  | 20  | -1.8361 | YES | chr14 | 106330168 | 106877502 | -0.7216 | 84  |     |
| CLL038TD | chr14 | 106376217 | 106579220 | -2.3488  | 26  | -3.6327 | YES | chr14 | 106330168 | 106561323 | -1.6025 | 40  |     |
| CLL022TD | chr14 | 106376217 | 106780862 | -0.8165  | 46  | -2.3377 | NO  |       |           |           |         |     | IGH |
| CLL141TD | chr14 | 106376217 | 107042562 | -7.7008  | 84  | -5.1246 | YES | chr14 | 106354195 | 106398480 | -1.1591 | 19  |     |
| CLL290TD | chr14 | 106378065 | 106552646 | -1.1611  | 22  | -2.3808 | YES | chr14 | 106243009 | 106561323 | -0.8239 | 55  |     |
| CLL030TD | chr14 | 106378065 | 106790974 | -1.1029  | 46  | -2.3458 | NO  |       |           |           |         |     | IGH |
| CLL277TD | chr14 | 106379028 | 106453023 | -1.6442  | 9   | -3.0226 | YES | chr14 | 106354195 | 106410678 | -0.9011 | 23  |     |

|          |       |           |           |         |     |         |     |       |           |           |         |     |     |
|----------|-------|-----------|-----------|---------|-----|---------|-----|-------|-----------|-----------|---------|-----|-----|
| CLL090TD | chr14 | 106379028 | 106714578 | -3.9606 | 40  | -4.5511 | YES | chr14 | 106330168 | 106724962 | -1.5966 | 62  |     |
| CLL145TD | chr14 | 106380172 | 107078725 | -0.7959 | 88  | -2.4810 | YES | chr14 | 106168179 | 107083152 | -0.6834 | 141 |     |
| CLL005TD | chr14 | 106382639 | 106471216 | -0.9334 | 9   | -2.4464 | YES | chr14 | 106330168 | 107182803 | -0.7506 | 120 |     |
| CLL166TD | chr14 | 106382639 | 106471598 | -1.1413 | 10  | -2.8512 | NO  |       |           |           |         |     | IGH |
| CLL032TD | chr14 | 106382639 | 106518370 | -0.8272 | 15  | -2.3765 | YES | chr14 | 106354195 | 106516175 | -0.6502 | 28  |     |
| CLL051TD | chr14 | 106382639 | 106518370 | -0.6511 | 15  | -2.2766 | YES | chr14 | 106330168 | 106517682 | -0.6045 | 35  |     |
| CLL053TD | chr14 | 106382639 | 106518770 | -1.1087 | 16  | -2.2663 | NO  |       |           |           |         |     | IGH |
| CLL157TD | chr14 | 106382639 | 106518770 | -1.0294 | 16  | -2.2734 | YES | chr14 | 106326556 | 106526710 | -0.9814 | 43  |     |
| CLL172TD | chr14 | 106382639 | 106518770 | -6.5509 | 16  | -4.9992 | YES | chr14 | 106330168 | 106538621 | -2.1448 | 40  |     |
| CLL181TD | chr14 | 106382639 | 106518770 | -1.2394 | 16  | -2.6055 | YES | chr14 | 106330168 | 106610162 | -0.9352 | 50  |     |
| CLL186TD | chr14 | 106382639 | 106518770 | -0.9747 | 16  | -2.0680 | YES | chr14 | 106168179 | 106811048 | -1.0292 | 109 |     |
| CLL191TD | chr14 | 106382639 | 106518770 | -0.7661 | 16  | -1.9551 | YES | chr14 | 106252596 | 107012899 | -0.8324 | 107 |     |
| CLL272TD | chr14 | 106382639 | 106518770 | -1.4227 | 16  | -2.6390 | YES | chr14 | 106330168 | 107081716 | -0.9841 | 111 |     |
| CLL110TD | chr14 | 106382639 | 106780862 | -0.9399 | 47  | -2.4535 | YES | chr14 | 106243009 | 107094934 | -0.7319 | 126 |     |
| CLL182TD | chr14 | 106382639 | 107283143 | -0.9601 | 104 | -2.2631 | YES | chr14 | 106330168 | 107218278 | -0.8158 | 125 |     |
| CLL189TD | chr14 | 106385308 | 106518770 | -1.9812 | 15  | -4.0744 | YES | chr14 | 106330168 | 106918315 | -1.3986 | 83  |     |
| CLL063TD | chr14 | 106385308 | 106539432 | -0.9603 | 17  | -2.5101 | NO  |       |           |           |         |     | IGH |
| CLL045TD | chr14 | 106386891 | 106518770 | -0.8168 | 14  | -2.2994 | YES | chr14 | 106243009 | 107179117 | -0.7934 | 132 |     |
| CLL029TD | chr14 | 106388010 | 106539432 | -7.4365 | 15  | -5.4218 | YES | chr14 | 106330168 | 107048607 | -1.0459 | 109 |     |
| CLL117TD | chr14 | 106388010 | 106539432 | -4.9691 | 15  | -5.3148 | YES | chr14 | 106354195 | 106398480 | -1.2201 | 21  |     |
| CLL174TD | chr14 | 106388010 | 106714578 | -5.9935 | 36  | -4.9610 | YES | chr14 | 106330168 | 106724962 | -2.2069 | 66  |     |
| CLL136TD | chr14 | 106405586 | 106815691 | -5.3440 | 47  | -4.5943 | YES | chr14 | 106331756 | 106826216 | -1.8593 | 66  |     |
| CLL280TD | chr14 | 106405586 | 106994184 | -8.2232 | 71  | -5.2026 | YES | chr14 | 106330168 | 107012899 | -2.3117 | 97  |     |
| CLL017TD | chr14 | 106452641 | 106518770 | -0.6930 | 10  | -2.4315 | YES | chr14 | 106243009 | 106827263 | -1.0022 | 82  |     |
| CLL184TD | chr14 | 106452641 | 106573203 | -0.7088 | 15  | -1.6962 | YES | chr14 | 106257663 | 107048607 | -0.8605 | 120 |     |
| CLL043TD | chr14 | 106452641 | 106815691 | -2.7739 | 45  | -4.0323 | YES | chr14 | 106252596 | 106829408 | -1.7132 | 88  |     |
| CLL173TD | chr14 | 106452641 | 106815691 | -7.8921 | 45  | -4.5566 | YES | chr14 | 106252596 | 106831538 | -1.9681 | 92  |     |
| CLL013TD | chr14 | 106471216 | 106518770 | -1.2356 | 8   | -2.3213 | YES | chr14 | 106330168 | 106877502 | -0.8658 | 85  |     |
| CLL274TD | chr14 | 106471598 | 106518770 | -1.1222 | 7   | -2.5065 | YES | chr14 | 106330168 | 106610162 | -1.1555 | 46  |     |
| CLL323TD | chr14 | 106471598 | 106667950 | -1.0314 | 27  | -2.2843 | YES | chr14 | 106330168 | 106691076 | -0.8079 | 62  |     |
| CLL042TD | chr14 | 106478456 | 106780862 | -0.5910 | 36  | -2.0657 | YES | chr14 | 106330168 | 106852841 | -0.5597 | 74  |     |
| CLL178TD | chr14 | 106494114 | 106667950 | -1.0761 | 24  | -2.4408 | YES | chr14 | 106243009 | 106691076 | -0.9101 | 68  |     |
| CLL005TD | chr14 | 106494114 | 107179179 | -0.8698 | 82  | -2.6884 | YES | chr14 | 106330168 | 107182803 | -0.7506 | 120 |     |
| CLL007TD | chr14 | 106518370 | 106714578 | -0.5846 | 25  | -1.6552 | YES | chr14 | 106519396 | 106724962 | -0.6403 | 23  |     |
| CLL175TD | chr14 | 106539432 | 106579220 | -9.9261 | 7   | -3.2213 | YES | chr14 | 106330168 | 107083152 | -2.5047 | 110 |     |
| CLL117TD | chr14 | 106552257 | 106641533 | -0.7576 | 13  | -2.4142 | NO  |       |           |           |         |     | IGH |
| CLL029TD | chr14 | 106552257 | 106791373 | -1.0915 | 31  | -2.0325 | YES | chr14 | 106330168 | 107048607 | -1.0459 | 109 |     |
| CLL275TD | chr14 | 106573203 | 106622262 | -1.0206 | 10  | -2.7397 | YES | chr14 | 106330168 | 106610162 | -0.8714 | 51  |     |
| CLL274TD | chr14 | 106573203 | 106641533 | -0.8573 | 11  | -2.6522 | YES | chr14 | 106330168 | 106610162 | -1.1555 | 46  |     |
| CLL017TD | chr14 | 106573203 | 106780482 | -0.8731 | 26  | -2.2794 | YES | chr14 | 106243009 | 106827263 | -1.0022 | 82  |     |
| CLL049TD | chr14 | 106573203 | 106780482 | -0.7634 | 26  | -1.9603 | YES | chr14 | 106330168 | 106993731 | -0.8750 | 98  |     |
| CLL064TD | chr14 | 106573203 | 106780482 | -0.8926 | 26  | -2.3684 | YES | chr14 | 106252596 | 106779188 | -0.8215 | 83  |     |
| CLL189TD | chr14 | 106573203 | 106780862 | -2.1427 | 27  | -4.1281 | YES | chr14 | 106330168 | 106918315 | -1.3986 | 83  |     |
| CLL191TD | chr14 | 106573203 | 106780862 | -0.9367 | 27  | -2.5173 | YES | chr14 | 106252596 | 107012899 | -0.8324 | 107 |     |
| CLL321TD | chr14 | 106573203 | 106790974 | -1.1435 | 28  | -2.4434 | YES | chr14 | 106330168 | 107169498 | -0.7248 | 117 |     |
| CLL083TD | chr14 | 106573203 | 106791373 | -0.7816 | 29  | -2.5324 | NO  |       |           |           |         |     | IGH |
| CLL144TD | chr14 | 106573203 | 106791373 | -0.8039 | 29  | -2.3375 | YES | chr14 | 106168179 | 106777490 | -0.9957 | 96  |     |
| CLL186TD | chr14 | 106573203 | 106815691 | -0.9825 | 31  | -2.2968 | YES | chr14 | 106168179 | 106811048 | -1.0292 | 109 |     |
| CLL040TD | chr14 | 106573203 | 106829563 | -0.9668 | 32  | -2.1573 | YES | chr14 | 106243009 | 106827263 | -0.3900 | 88  |     |
| CLL266TD | chr14 | 106573203 | 106829563 | -0.9135 | 32  | -2.2213 | NO  |       |           |           |         |     | IGH |
| CLL013TD | chr14 | 106573203 | 106866773 | -1.0982 | 41  | -2.7118 | YES | chr14 | 106330168 | 106877502 | -0.8658 | 85  |     |
| CLL053TD | chr14 | 106573203 | 107042562 | -1.0808 | 61  | -2.8464 | NO  |       |           |           |         |     | IGH |
| CLL045TD | chr14 | 106573203 | 107083602 | -0.8701 | 69  | -2.6099 | YES | chr14 | 106243009 | 107179117 | -0.7934 | 132 |     |
| CLL027TD | chr14 | 106573203 | 107083602 | -0.9766 | 70  | -2.4843 | YES | chr14 | 106320095 | 107182803 | -0.8139 | 131 |     |
| CLL008TD | chr14 | 106573203 | 107131398 | -0.9589 | 75  | -2.6535 | YES | chr14 | 106243009 | 107167303 | -0.8026 | 131 |     |
| CLL044TD | chr14 | 106573203 | 107178794 | -0.8343 | 79  | -2.1425 | YES | chr14 | 107151892 | 107169498 | -1.4230 | 0   |     |
| CLL152TD | chr14 | 106573203 | 107283143 | -0.7168 | 88  | -2.3787 | YES | chr14 | 106330168 | 107287646 | -0.6983 | 134 |     |
| CLL278TD | chr14 | 106573597 | 106667950 | -0.9226 | 15  | -2.4059 | YES | chr14 | 106252596 | 106691076 | -0.6082 | 70  |     |
| CLL184TD | chr14 | 106573597 | 106829563 | -1.4963 | 32  | -2.1603 | YES | chr14 | 106257663 | 107048607 | -0.8605 | 120 |     |
| CLL273TD | chr14 | 106573597 | 106877972 | -1.0273 | 41  | -2.4129 | YES | chr14 | 106330168 | 106877502 | -0.7216 | 84  |     |
| CLL048TD | chr14 | 106586106 | 106622262 | -0.7856 | 6   | -2.8996 | NO  |       |           |           |         |     | IGH |
| CLL019TD | chr14 | 106586106 | 106653461 | -7.0818 | 9   | -5.5147 | YES | chr14 | 106330168 | 106724962 | -1.7993 | 61  |     |
| CLL038TD | chr14 | 106586106 | 106791373 | -0.6606 | 25  | -1.9891 | YES | chr14 | 106632143 | 106779188 | -0.5882 | 15  |     |
| CLL175TD | chr14 | 106586106 | 107078725 | -7.2572 | 62  | -5.6676 | YES | chr14 | 106330168 | 107083152 | -2.5047 | 110 |     |
| CLL052TD | chr14 | 106610286 | 106856254 | -2.3445 | 30  | -3.8999 | YES | chr14 | 106168179 | 107015590 | -1.4376 | 124 |     |
| CLL019TD | chr14 | 106663366 | 106714578 | -9.1864 | 6   | -5.3595 | YES | chr14 | 106330168 | 106724962 | -1.7993 | 61  |     |
| CLL090TD | chr14 | 106725171 | 106805561 | -0.9174 | 12  | -1.6604 | YES | chr14 | 106726871 | 106829408 | -0.5597 | 11  |     |
| CLL174TD | chr14 | 106733114 | 107034699 | -0.9403 | 38  | -2.8728 | YES | chr14 | 106726871 | 107012899 | -0.7352 | 35  |     |
| CLL019TD | chr14 | 106733114 | 107083602 | -0.7270 | 47  | -2.6257 | NO  |       |           |           |         |     | IGH |
| CLL272TD | chr14 | 106780862 | 107083225 | -1.0860 | 42  | -3.0058 | YES | chr14 | 106330168 | 107081716 | -0.9841 | 111 |     |
| CLL100TD | chr14 | 106790974 | 107169901 | -0.9732 | 48  | -3.0571 | YES | chr14 | 106825816 | 107150851 | -0.7333 | 43  |     |
| CLL049TD | chr14 | 106805181 | 106974717 | -0.7949 | 25  | -2.4744 | YES | chr14 | 106330168 | 106993731 | -0.8750 | 98  |     |
| CLL042TD | chr14 | 106815691 | 106858875 | -0.5635 | 8   | -2.9601 | YES | chr14 | 106330168 | 106852841 | -0.5597 | 74  |     |
| CLL082TD | chr14 | 106829563 | 106866773 | -1.1196 | 9   | -3.5838 | YES | chr14 | 106833210 | 106877502 | -0.7007 | 7   |     |
| CLL189TD | chr14 | 106829563 | 106877972 | -1.3856 | 11  | -3.7524 | YES | chr14 | 106330168 | 106918315 | -1.3986 | 83  |     |
| CLL191TD | chr14 | 106829563 | 107012911 | -0.8653 | 25  | -3.0239 | YES | chr14 | 106252596 | 107012899 | -0.8324 | 107 |     |
| CLL136TD | chr14 | 106829563 | 107034699 | -0.9639 | 27  | -3.6669 | YES | chr14 | 106829008 | 107041398 | -0.7250 | 28  |     |
| CLL173TD | chr14 | 106829563 | 107042562 | -1.0421 | 29  | -3.4730 | YES | chr14 | 106252596 | 106831538 | -1.9681 | 92  |     |

|          |       |           |           |         |     |         |     |       |           |           |         |      |          |
|----------|-------|-----------|-----------|---------|-----|---------|-----|-------|-----------|-----------|---------|------|----------|
| CLL029TD | chr14 | 106829563 | 107048641 | -0.9554 | 30  | -2.8497 | YES | chr14 | 106330168 | 107048607 | -1.0459 | 109  |          |
| CLL083TD | chr14 | 106829563 | 107083602 | -0.7144 | 37  | -3.0324 | NO  |       |           |           |         |      | IGH      |
| CLL110TD | chr14 | 106829563 | 107095088 | -0.8444 | 38  | -3.3085 | YES | chr14 | 106243009 | 107094934 | -0.7319 | 126  |          |
| CLL321TD | chr14 | 106829563 | 107131398 | -1.0596 | 43  | -3.0164 | YES | chr14 | 106330168 | 107169498 | -0.7248 | 117  |          |
| CLL023TD | chr14 | 106829563 | 107169901 | -0.8562 | 44  | -2.6618 | YES | chr14 | 106320095 | 107169498 | -0.7311 | 122  |          |
| CLL184TD | chr14 | 106829941 | 107042562 | -0.8345 | 28  | -2.6315 | YES | chr14 | 106257663 | 107048607 | -0.8605 | 120  |          |
| CLL052TD | chr14 | 106858875 | 107013314 | -1.8241 | 21  | -4.4795 | YES | chr14 | 106168179 | 107015590 | -1.4376 | 124  |          |
| CLL189TD | chr14 | 106926160 | 107013314 | -0.4216 | 15  | -2.6262 | YES | chr14 | 106927167 | 107169498 | -0.3894 | 30   |          |
| CLL280TD | chr14 | 107012911 | 107283143 | -0.3559 | 31  | -1.6800 | YES | chr14 | 107013844 | 107081716 | -0.8741 | 9    |          |
| CLL189TD | chr14 | 107034699 | 107131398 | -0.7188 | 17  | -2.8055 | YES | chr14 | 106927167 | 107169498 | -0.3894 | 30   |          |
| CLL172TD | chr14 | 107048641 | 107083225 | -0.8724 | 7   | -3.0084 | YES | chr14 | 107050074 | 107083152 | -0.7786 | 4    |          |
| CLL141TD | chr14 | 107048641 | 107283143 | -1.1519 | 27  | -2.0172 | YES | chr14 | 107046530 | 107128311 | -1.0109 | 12   |          |
| CLL045TD | chr14 | 107095088 | 107169901 | -0.4504 | 7   | -2.0548 | YES | chr14 | 106243009 | 107179117 | -0.7934 | 132  |          |
| CLL027TD | chr14 | 107095088 | 107179179 | -1.3809 | 10  | -2.2975 | YES | chr14 | 106320095 | 107182803 | -0.8139 | 131  |          |
| CLL083TD | chr14 | 107113711 | 107283143 | -0.8322 | 17  | -2.9388 | YES | chr14 | 107159767 | 107181281 | -1.4358 | 4    |          |
| CLL141TD | chr15 | 34295201  | 35376969  | -0.9415 | 120 | -3.8542 | YES | chr15 | 34202339  | 37462956  | -0.5534 | 158  |          |
| CLL141TD | chr15 | 36872051  | 37402382  | -1.0103 | 27  | -3.5577 | YES | chr15 | 34202339  | 37462956  | -0.5534 | 158  |          |
| CLL155TD | chr15 | 40056008  | 42492042  | -0.5280 | 637 | -1.9846 | NO  |       |           |           |         |      | SUBCLONE |
| CLL141TD | chr15 | 40253922  | 41571500  | -1.0610 | 310 | -3.5989 | YES | chr15 | 40253746  | 41576166  | -1.0220 | 310  |          |
| CLL189TD | chr15 | 42139477  | 42167617  | -0.4072 | 30  | -1.8939 | NO  |       |           |           |         |      |          |
| CLL110TD | chr15 | 43022309  | 43028357  | -0.5438 | 14  | -1.7192 | NO  |       |           |           |         |      |          |
| CLL100TD | chr15 | 50731262  | 51204250  | -0.8320 | 84  | -3.5269 | YES | chr15 | 50651053  | 51058342  | -0.9131 | 83   |          |
| CLL141TD | chr15 | 56385501  | 56436579  | -1.0077 | 8   | -7.3797 | YES | chr15 | 56332487  | 56599346  | -0.9313 | 9    |          |
| CLL175TD | chr15 | 65410996  | 65471184  | -0.9515 | 19  | -4.4094 | YES | chr15 | 65368825  | 65478380  | -0.8670 | 20   |          |
| CLL110TD | chr16 | 10971123  | 10995817  | -0.7927 | 7   | -1.9072 | NO  |       |           |           |         |      |          |
| CLL145TD | chr16 | 50059526  | 51098366  | -0.7230 | 108 | -3.0494 | YES | chr16 | 49962692  | 50875648  | -0.7276 | 107  |          |
| CLL041TD | chr16 | 50328546  | 50339633  | -0.9191 | 6   | -1.6396 | NO  |       |           |           |         |      |          |
| CLL275TD | chr16 | 67235259  | 67241734  | 0.6217  | 9   | 1.8107  | NO  |       |           |           |         |      |          |
| CLL192TD | chr17 | 5967      | 2584999   | -1.2569 | 376 | -3.2789 | YES | chr17 | 72804     | 18537304  | -0.6050 | 3102 |          |
| CLL192TD | chr17 | 2596053   | 2599656   | -1.8087 | 8   | -1.9948 | YES | chr17 | 72804     | 18537304  | -0.6050 | 3102 |          |
| CLL189TD | chr17 | 2596053   | 2603925   | -0.7670 | 11  | -1.9002 | NO  |       |           |           |         |      |          |
| CLL192TD | chr17 | 2599944   | 2934193   | -1.3907 | 31  | -2.8389 | YES | chr17 | 72804     | 18537304  | -0.6050 | 3102 |          |
| CLL192TD | chr17 | 2935648   | 3417866   | -0.8273 | 32  | -4.7041 | YES | chr17 | 72804     | 18537304  | -0.6050 | 3102 |          |
| CLL192TD | chr17 | 3419716   | 3807209   | -1.3656 | 136 | -3.0931 | YES | chr17 | 72804     | 18537304  | -0.6050 | 3102 |          |
| CLL192TD | chr17 | 3807568   | 3828027   | -2.5119 | 6   | -1.7495 | YES | chr17 | 72804     | 18537304  | -0.6050 | 3102 |          |
| CLL192TD | chr17 | 3828643   | 3917372   | -1.6252 | 22  | -2.2447 | YES | chr17 | 72804     | 18537304  | -0.6050 | 3102 |          |
| CLL192TD | chr17 | 3917604   | 4342925   | -0.9298 | 80  | -3.9638 | YES | chr17 | 72804     | 18537304  | -0.6050 | 3102 |          |
| CLL192TD | chr17 | 4348244   | 4435801   | -1.3769 | 14  | -2.0278 | YES | chr17 | 72804     | 18537304  | -0.6050 | 3102 |          |
| CLL192TD | chr17 | 4436197   | 4451242   | -1.9605 | 19  | -2.0787 | YES | chr17 | 72804     | 18537304  | -0.6050 | 3102 |          |
| CLL192TD | chr17 | 4451371   | 4457441   | -1.2206 | 10  | -2.3049 | YES | chr17 | 72804     | 18537304  | -0.6050 | 3102 |          |
| CLL192TD | chr17 | 4458143   | 4498380   | -1.9351 | 10  | -1.8688 | YES | chr17 | 72804     | 18537304  | -0.6050 | 3102 |          |
| CLL192TD | chr17 | 4500422   | 4594644   | -1.2243 | 29  | -3.3052 | YES | chr17 | 72804     | 18537304  | -0.6050 | 3102 |          |
| CLL145TD | chr17 | 4585772   | 4910709   | -0.7493 | 187 | -2.6673 | YES | chr17 | 4579986   | 4912490   | -0.6841 | 188  |          |
| CLL192TD | chr17 | 4619237   | 4799227   | -1.2823 | 97  | -2.6608 | YES | chr17 | 72804     | 18537304  | -0.6050 | 3102 |          |
| CLL192TD | chr17 | 4800480   | 4804024   | -2.1384 | 8   | -1.8273 | YES | chr17 | 72804     | 18537304  | -0.6050 | 3102 |          |
| CLL192TD | chr17 | 4804779   | 5042231   | -1.2205 | 113 | -3.3036 | YES | chr17 | 72804     | 18537304  | -0.6050 | 3102 |          |
| CLL192TD | chr17 | 5044696   | 5388443   | -0.8610 | 85  | -4.1126 | YES | chr17 | 72804     | 18537304  | -0.6050 | 3102 |          |
| CLL192TD | chr17 | 5389344   | 6428669   | -1.3372 | 57  | -2.8142 | YES | chr17 | 72804     | 18537304  | -0.6050 | 3102 |          |
| CLL192TD | chr17 | 6441264   | 6905704   | -0.9479 | 70  | -3.6677 | YES | chr17 | 72804     | 18537304  | -0.6050 | 3102 |          |
| CLL192TD | chr17 | 6908528   | 8222580   | -1.2734 | 764 | -3.2141 | YES | chr17 | 72804     | 18537304  | -0.6050 | 3102 |          |
| CLL145TD | chr17 | 7186501   | 7256220   | -0.8010 | 76  | -2.5775 | YES | chr17 | 7186117   | 7258392   | -0.6833 | 76   |          |
| CLL192TD | chr17 | 8222778   | 8366594   | -0.8242 | 19  | -4.0862 | YES | chr17 | 72804     | 18537304  | -0.6050 | 3102 |          |
| CLL192TD | chr17 | 8370234   | 8421908   | -1.1691 | 23  | -3.6240 | YES | chr17 | 72804     | 18537304  | -0.6050 | 3102 |          |
| CLL192TD | chr17 | 8422173   | 8526211   | -0.7201 | 20  | -3.9512 | YES | chr17 | 72804     | 18537304  | -0.6050 | 3102 |          |
| CLL192TD | chr17 | 8633426   | 10222061  | -1.2305 | 154 | -3.3931 | YES | chr17 | 72804     | 18537304  | -0.6050 | 3102 |          |
| CLL192TD | chr17 | 10223454  | 10531892  | -0.7020 | 150 | -4.8723 | YES | chr17 | 72804     | 18537304  | -0.6050 | 3102 |          |
| CLL192TD | chr17 | 10532832  | 13399511  | -0.9611 | 201 | -4.0569 | YES | chr17 | 72804     | 18537304  | -0.6050 | 3102 |          |
| CLL192TD | chr17 | 13972853  | 14139839  | -1.0640 | 10  | -2.4812 | YES | chr17 | 72804     | 18537304  | -0.6050 | 3102 |          |
| CLL192TD | chr17 | 14683126  | 16219950  | -0.9559 | 129 | -3.7600 | YES | chr17 | 72804     | 18537304  | -0.6050 | 3102 |          |
| CLL192TD | chr17 | 16221005  | 16336799  | -1.3820 | 20  | -3.5389 | YES | chr17 | 72804     | 18537304  | -0.6050 | 3102 |          |
| CLL192TD | chr17 | 16338153  | 16675251  | -0.8093 | 35  | -3.2615 | YES | chr17 | 72804     | 18537304  | -0.6050 | 3102 |          |
| CLL192TD | chr17 | 16676766  | 18332957  | -1.3070 | 336 | -2.6550 | YES | chr17 | 72804     | 18537304  | -0.6050 | 3102 |          |
| CLL192TD | chr17 | 18481231  | 18498417  | -0.9459 | 6   | -2.8128 | YES | chr17 | 72804     | 18537304  | -0.6050 | 3102 |          |
| CLL192TD | chr17 | 19400745  | 21821981  | 0.4045  | 212 | 2.5914  | YES | chr17 | 18752453  | 22028853  | 0.4425  | 292  |          |
| CLL110TD | chr17 | 28887107  | 28903008  | -0.4911 | 7   | -1.6728 | NO  |       |           |           |         |      |          |
| CLL100TD | chr17 | 42461610  | 42463318  | -1.4973 | 7   | -1.8743 | NO  |       |           |           |         |      |          |
| CLL023TD | chr17 | 44336902  | 45699089  | 0.5388  | 135 | 3.4832  | YES | chr17 | 44165526  | 81027191  | 0.3915  | 4296 |          |
| CLL023TD | chr17 | 45730000  | 48246413  | 0.3913  | 369 | 2.9082  | YES | chr17 | 44165526  | 81027191  | 0.3915  | 4296 |          |
| CLL023TD | chr17 | 48762032  | 53237094  | 0.6592  | 147 | 4.4453  | YES | chr17 | 44165526  | 81027191  | 0.3915  | 4296 |          |
| CLL023TD | chr17 | 53342782  | 54972833  | 0.5296  | 54  | 3.8592  | YES | chr17 | 44165526  | 81027191  | 0.3915  | 4296 |          |
| CLL023TD | chr17 | 54973239  | 56780503  | 0.4121  | 243 | 3.2151  | YES | chr17 | 44165526  | 81027191  | 0.3915  | 4296 |          |
| CLL023TD | chr17 | 56783887  | 60744084  | 0.5738  | 458 | 4.0601  | YES | chr17 | 44165526  | 81027191  | 0.3915  | 4296 |          |
| CLL274TD | chr17 | 58088453  | 58096254  | 0.8702  | 8   | 1.9898  | NO  |       |           |           |         |      |          |
| CLL110TD | chr17 | 58232611  | 58236537  | -0.9219 | 7   | -1.8002 | NO  |       |           |           |         |      |          |
| CLL023TD | chr17 | 60788558  | 61492841  | 0.5676  | 33  | 4.1265  | YES | chr17 | 44165526  | 81027191  | 0.3915  | 4296 |          |
| CLL023TD | chr17 | 61495597  | 61805651  | 0.3578  | 90  | 2.8247  | YES | chr17 | 44165526  | 81027191  | 0.3915  | 4296 |          |
| CLL023TD | chr17 | 61824220  | 61899285  | 0.5523  | 36  | 4.5703  | YES | chr17 | 44165526  | 81027191  | 0.3915  | 4296 |          |
| CLL023TD | chr17 | 61901094  | 62121333  | 0.3068  | 85  | 2.8891  | YES | chr17 | 44165526  | 81027191  | 0.3915  | 4296 |          |



|          |       |          |          |         |      |         |     |       |          |          |         |      |          |
|----------|-------|----------|----------|---------|------|---------|-----|-------|----------|----------|---------|------|----------|
| CLL023TD | chr17 | 62122193 | 63553910 | 0.4889  | 170  | 4.0546  | YES | chr17 | 44165526 | 81027191 | 0.3915  | 4296 |          |
| CLL023TD | chr17 | 63632030 | 65928020 | 0.6218  | 154  | 4.3216  | YES | chr17 | 44165526 | 81027191 | 0.3915  | 4296 |          |
| CLL023TD | chr17 | 65936543 | 66533539 | 0.4409  | 76   | 4.1865  | YES | chr17 | 44165526 | 81027191 | 0.3915  | 4296 |          |
| CLL023TD | chr17 | 66535447 | 67516362 | 0.7207  | 204  | 4.4307  | YES | chr17 | 44165526 | 81027191 | 0.3915  | 4296 |          |
| CLL023TD | chr17 | 67517155 | 71166771 | 0.4756  | 26   | 3.5217  | YES | chr17 | 44165526 | 81027191 | 0.3915  | 4296 |          |
| CLL023TD | chr17 | 71192557 | 78969424 | 0.3138  | 1324 | 2.2168  | YES | chr17 | 44165526 | 81027191 | 0.3915  | 4296 |          |
| CLL023TD | chr17 | 80404445 | 81006482 | 0.3677  | 99   | 2.6037  | YES | chr17 | 44165526 | 81027191 | 0.3915  | 4296 |          |
| CLL008TD | chr18 | 47434    | 2795905  | -0.5633 | 168  | -2.5584 | NO  |       |          |          |         |      | SUBCLONE |
| CLL022TD | chr18 | 47434    | 3277211  | -0.8853 | 235  | -4.0345 | YES | chr18 | 14116    | 14978275 | -0.8543 | 826  |          |
| CLL182TD | chr18 | 47434    | 15270910 | -0.3462 | 844  | -1.7121 | NO  |       |          |          |         |      | SUBCLONE |
| CLL008TD | chr18 | 2847747  | 5478218  | -0.5924 | 110  | -3.0624 | NO  |       |          |          |         |      | SUBCLONE |
| CLL022TD | chr18 | 3277728  | 5410501  | -1.1861 | 32   | -4.5117 | YES | chr18 | 14116    | 14978275 | -0.8543 | 826  |          |
| CLL022TD | chr18 | 5415766  | 15330053 | -0.8564 | 574  | -3.5080 | YES | chr18 | 14116    | 14978275 | -0.8543 | 826  |          |
| CLL008TD | chr18 | 5956152  | 18531256 | -0.5673 | 552  | -2.5559 | NO  |       |          |          |         |      | SUBCLONE |
| CLL100TD | chr18 | 67872788 | 78005155 | -1.0679 | 220  | -3.6304 | YES | chr18 | 68818906 | 78015254 | -0.8682 | 218  |          |
| CLL155TD | chr18 | 74671557 | 74962477 | -0.6199 | 16   | -2.2153 | NO  |       |          |          |         |      | SUBCLONE |
| CLL030TD | chr19 | 1487761  | 1496569  | -1.7960 | 6    | -1.8918 | NO  |       |          |          |         |      |          |
| CLL189TD | chr19 | 2339769  | 2344540  | -1.5935 | 7    | -1.7747 | NO  |       |          |          |         |      |          |
| CLL191TD | chr19 | 37309275 | 37487180 | -1.1080 | 19   | -4.6655 | YES | chr19 | 37294161 | 37493102 | -0.9718 | 19   |          |
| CLL136TD | chr19 | 41021166 | 41075537 | -0.8430 | 8    | -2.0517 | NO  |       |          |          |         |      |          |
| CLL043TD | chr19 | 51883675 | 52364144 | 0.3666  | 71   | 2.6405  | YES | chr19 | 51882938 | 59097086 | 0.4277  | 1235 |          |
| CLL043TD | chr19 | 52375741 | 52671257 | 0.6200  | 36   | 5.3871  | YES | chr19 | 51882938 | 59097086 | 0.4277  | 1235 |          |
| CLL043TD | chr19 | 52772815 | 53473199 | 0.7979  | 68   | 5.9268  | YES | chr19 | 51882938 | 59097086 | 0.4277  | 1235 |          |
| CLL043TD | chr19 | 53507866 | 54139805 | 0.5726  | 61   | 4.7213  | YES | chr19 | 51882938 | 59097086 | 0.4277  | 1235 |          |
| CLL043TD | chr19 | 54169885 | 54265580 | 0.7745  | 45   | 4.6577  | YES | chr19 | 51882938 | 59097086 | 0.4277  | 1235 |          |
| CLL043TD | chr19 | 54290871 | 55593083 | 0.3644  | 398  | 2.1553  | YES | chr19 | 51882938 | 59097086 | 0.4277  | 1235 |          |
| CLL043TD | chr19 | 55597124 | 55817568 | 0.3480  | 92   | 1.6494  | YES | chr19 | 51882938 | 59097086 | 0.4277  | 1235 |          |
| CLL013TD | chr19 | 55604133 | 55610270 | -1.2369 | 6    | -1.6191 | NO  |       |          |          |         |      |          |
| CLL043TD | chr19 | 55828123 | 59093631 | 0.4240  | 444  | 3.5227  | YES | chr19 | 51882938 | 59097086 | 0.4277  | 1235 |          |
| CLL022TD | chr2  | 41527    | 25061688 | 0.5351  | 1033 | 3.5597  | YES | chr2  | 50461    | 89160333 | 0.4951  | 5272 |          |
| CLL017TD | chr2  | 41527    | 30381476 | 0.5549  | 1891 | 3.8323  | YES | chr2  | 16819    | 30432982 | 0.5429  | 1891 |          |
| CLL008TD | chr2  | 41527    | 89160356 | 0.4833  | 5258 | 3.2568  | YES | chr2  | 16819    | 89160333 | 0.4635  | 5257 |          |
| CLL020TD | chr2  | 41527    | 89102306 | 0.5442  | 5306 | 3.6805  | YES | chr2  | 16819    | 89126843 | 0.5388  | 5306 |          |
| CLL022TD | chr2  | 25062670 | 27760245 | 0.4115  | 580  | 2.7774  | YES | chr2  | 50461    | 89160333 | 0.4951  | 5272 |          |
| CLL275TD | chr2  | 25466965 | 25497762 | 0.4522  | 10   | 1.7179  | NO  |       |          |          |         |      |          |
| CLL022TD | chr2  | 27788182 | 32530506 | 0.4955  | 433  | 3.2729  | YES | chr2  | 50461    | 89160333 | 0.4951  | 5272 |          |
| CLL022TD | chr2  | 32532136 | 64796694 | 0.5705  | 1774 | 3.8790  | YES | chr2  | 50461    | 89160333 | 0.4951  | 5272 |          |
| CLL274TD | chr2  | 42181186 | 42284725 | 0.6794  | 7    | 1.7297  | NO  |       |          |          |         |      |          |
| CLL274TD | chr2  | 45169216 | 45418011 | 0.6798  | 6    | 1.6342  | NO  |       |          |          |         |      |          |
| CLL017TD | chr2  | 50883447 | 66798339 | 0.3224  | 765  | 2.3601  | YES | chr2  | 52017346 | 66917238 | 0.3384  | 752  |          |
| CLL022TD | chr2  | 64800020 | 74604723 | 0.4794  | 728  | 3.2032  | YES | chr2  | 50461    | 89160333 | 0.4951  | 5272 |          |
| CLL022TD | chr2  | 74605039 | 74762648 | 0.3171  | 111  | 2.5272  | YES | chr2  | 50461    | 89160333 | 0.4951  | 5272 |          |
| CLL022TD | chr2  | 74763079 | 75157569 | 0.4746  | 50   | 2.8205  | YES | chr2  | 50461    | 89160333 | 0.4951  | 5272 |          |
| CLL022TD | chr2  | 75186449 | 85051022 | 0.6177  | 175  | 4.1715  | YES | chr2  | 50461    | 89160333 | 0.4951  | 5272 |          |
| CLL022TD | chr2  | 85059163 | 87049414 | 0.4835  | 282  | 3.2891  | YES | chr2  | 50461    | 89160333 | 0.4951  | 5272 |          |
| CLL063TD | chr2  | 85628249 | 85661417 | 0.6690  | 6    | 1.6646  | NO  |       |          |          |         |      |          |
| CLL022TD | chr2  | 87080104 | 89160691 | 0.4569  | 106  | 2.7180  | YES | chr2  | 50461    | 89160333 | 0.4951  | 5272 |          |
| CLL023TD | chr2  | 89156854 | 89161356 | -1.1652 | 6    | -3.5646 | YES | chr2  | 89132766 | 89160333 | -0.8755 | 2    |          |
| CLL173TD | chr2  | 89156854 | 89161356 | -2.5486 | 6    | -5.9544 | YES | chr2  | 89132766 | 89158640 | -2.9058 | 1    |          |
| CLL174TD | chr2  | 89156854 | 89161356 | -1.1072 | 6    | -3.2831 | YES | chr2  | 89132766 | 89158640 | -0.8230 | 1    |          |
| CLL168TD | chr2  | 89156854 | 89196972 | -5.0728 | 10   | -7.0221 | YES | chr2  | 89132766 | 89276358 | -1.9190 | 14   |          |
| CLL272TD | chr2  | 89156854 | 89196972 | -3.6236 | 10   | -6.1602 | YES | chr2  | 89132766 | 89160333 | -3.9312 | 2    |          |
| CLL009TD | chr2  | 89156854 | 89290378 | -3.2773 | 17   | -7.0406 | YES | chr2  | 89132766 | 89276358 | -2.8620 | 14   |          |
| CLL090TD | chr2  | 89156854 | 89320097 | -0.9598 | 25   | -3.6516 | YES | chr2  | 89132766 | 89158640 | -2.1664 | 1    |          |
| CLL278TD | chr2  | 89156854 | 89327096 | -4.2794 | 27   | -6.8116 | YES | chr2  | 89132766 | 89508208 | -1.9548 | 39   |          |
| CLL048TD | chr2  | 89156854 | 89417220 | -1.0894 | 33   | -3.4909 | YES | chr2  | 89132766 | 89441299 | -0.7572 | 33   |          |
| CLL170TD | chr2  | 89156854 | 89512875 | -0.9394 | 39   | -3.3298 | YES | chr2  | 89132766 | 89488503 | -0.7020 | 38   |          |
| CLL166TD | chr2  | 89156854 | 89544238 | -1.1298 | 44   | -3.4770 | YES | chr2  | 89126443 | 89480685 | -0.5831 | 39   |          |
| CLL189TD | chr2  | 89156854 | 90249067 | -0.9460 | 77   | -3.3042 | YES | chr2  | 89132766 | 89160333 | -1.5694 | 2    |          |
| CLL013TD | chr2  | 89160038 | 89196972 | -0.9390 | 9    | -2.9641 | YES | chr2  | 89159933 | 89234800 | -0.9188 | 9    |          |
| CLL175TD | chr2  | 89160038 | 89246786 | -0.9414 | 10   | -3.6095 | YES | chr2  | 89163662 | 89234800 | -0.7846 | 4    |          |
| CLL171TD | chr2  | 89160038 | 89290378 | -4.2233 | 16   | -7.4763 | YES | chr2  | 89159933 | 89203473 | -2.9553 | 9    |          |
| CLL145TD | chr2  | 89160038 | 89309863 | -0.8463 | 21   | -3.1907 | YES | chr2  | 89163662 | 89312731 | -0.6859 | 16   |          |
| CLL186TD | chr2  | 89160038 | 89309446 | -1.0574 | 21   | -3.6263 | YES | chr2  | 89159933 | 89276358 | -0.8164 | 13   |          |
| CLL032TD | chr2  | 89160038 | 89399739 | -0.9336 | 31   | -3.1934 | YES | chr2  | 89159933 | 89312731 | -0.7068 | 22   |          |
| CLL266TD | chr2  | 89160038 | 89544964 | -0.7795 | 44   | -2.7875 | YES | chr2  | 89159933 | 89539015 | -0.6806 | 42   |          |
| CLL029TD | chr2  | 89160356 | 89196972 | -2.9727 | 8    | -5.7343 | YES | chr2  | 89185690 | 89196925 | -4.0093 | 2    |          |
| CLL184TD | chr2  | 89160356 | 89196972 | -4.7055 | 8    | -7.1251 | YES | chr2  | 89163662 | 89244018 | -2.6475 | 4    |          |
| CLL274TD | chr2  | 89160356 | 89196972 | -0.8589 | 8    | -2.5221 | YES | chr2  | 89185102 | 89196925 | -0.7634 | 3    |          |
| CLL005TD | chr2  | 89160356 | 89290378 | -0.9660 | 15   | -4.2719 | YES | chr2  | 89129332 | 89480685 | -0.7712 | 40   |          |
| CLL124TD | chr2  | 89160356 | 89290378 | -0.9793 | 15   | -3.8947 | YES | chr2  | 89163662 | 89276358 | -0.7008 | 8    |          |
| CLL192TD | chr2  | 89160356 | 89292312 | -0.7631 | 17   | -3.7334 | YES | chr2  | 89163662 | 89276358 | -0.6073 | 8    |          |
| CLL321TD | chr2  | 89160356 | 89319463 | -0.9034 | 21   | -3.5256 | YES | chr2  | 89159933 | 89441299 | -0.7253 | 32   |          |
| CLL042TD | chr2  | 89160356 | 89417220 | -1.9590 | 32   | -5.2045 | YES | chr2  | 89163662 | 89430043 | -1.3733 | 28   |          |
| CLL045TD | chr2  | 89160356 | 89417220 | -0.9708 | 32   | -3.2584 | NO  |       |          |          |         |      | IGK      |
| CLL100TD | chr2  | 89160356 | 89475786 | -4.1794 | 36   | -6.4438 | YES | chr2  | 89132766 | 89450569 | -2.3855 | 35   |          |
| CLL144TD | chr2  | 89160356 | 89533640 | -0.9031 | 38   | -3.5036 | YES | chr2  | 89163662 | 89487166 | -0.7306 | 31   |          |
| CLL041TD | chr2  | 89160356 | 89513294 | -2.1924 | 39   | -5.1665 | YES | chr2  | 89163662 | 89450569 | -1.6698 | 30   |          |

|          |      |          |          |         |    |         |     |      |          |          |         |    |     |
|----------|------|----------|----------|---------|----|---------|-----|------|----------|----------|---------|----|-----|
| CLL007TD | chr2 | 89160356 | 89534308 | -0.8856 | 41 | -3.0161 | YES | chr2 | 89163662 | 89430043 | -0.7962 | 28 |     |
| CLL117TD | chr2 | 89160356 | 89568144 | -0.9329 | 45 | -3.0710 | YES | chr2 | 89163662 | 89602064 | -0.6157 | 41 |     |
| CLL051TD | chr2 | 89160691 | 89417220 | -3.3980 | 31 | -5.8378 | YES | chr2 | 89163662 | 89430043 | -2.3841 | 28 |     |
| CLL172TD | chr2 | 89160691 | 89442506 | -0.7657 | 32 | -3.0839 | YES | chr2 | 89163662 | 89441299 | -0.7525 | 27 |     |
| CLL282TD | chr2 | 89160691 | 89417220 | -7.7098 | 32 | -6.4613 | YES | chr2 | 89163662 | 89312731 | -3.4583 | 17 |     |
| CLL194TD | chr2 | 89160691 | 89513294 | -5.9925 | 38 | -6.6104 | YES | chr2 | 89132766 | 89508208 | -2.5227 | 39 |     |
| CLL052TD | chr2 | 89160691 | 89513294 | -2.2623 | 39 | -5.1414 | YES | chr2 | 89163662 | 89232525 | -1.9294 | 4  |     |
| CLL063TD | chr2 | 89160691 | 89533640 | -0.7950 | 39 | -3.0358 | YES | chr2 | 89163662 | 89617070 | -0.6622 | 41 |     |
| CLL182TD | chr2 | 89160691 | 89513294 | -0.9851 | 39 | -3.3092 | YES | chr2 | 89450314 | 89508208 | -0.4770 | 3  |     |
| CLL267TD | chr2 | 89160691 | 89544964 | -0.8717 | 42 | -2.8987 | YES | chr2 | 89163662 | 89539015 | -0.6202 | 37 |     |
| CLL082TD | chr2 | 89160691 | 89568144 | -8.8327 | 43 | -6.4135 | YES | chr2 | 89158240 | 90226606 | -1.7380 | 72 |     |
| CLL178TD | chr2 | 89160691 | 89568144 | -9.5138 | 43 | -6.4361 | YES | chr2 | 89163662 | 89186090 | -4.2350 | 2  |     |
| CLL008TD | chr2 | 89160691 | 89975667 | -0.6300 | 47 | -2.3127 | YES | chr2 | 89163662 | 89312731 | -0.6907 | 17 |     |
| CLL020TD | chr2 | 89160995 | 89196972 | -6.9250 | 6  | -7.4900 | YES | chr2 | 89163662 | 89241426 | -3.6293 | 4  |     |
| CLL279TD | chr2 | 89160995 | 89196972 | -0.6769 | 6  | -3.0212 | YES | chr2 | 89163662 | 89241426 | -0.7602 | 4  |     |
| CLL319TD | chr2 | 89160995 | 89196972 | -0.9056 | 6  | -2.9543 | NO  |      |          |          |         |    | IGK |
| CLL038TD | chr2 | 89160995 | 89309446 | -2.2245 | 18 | -6.0223 | YES | chr2 | 89163662 | 89276358 | -1.8013 | 8  |     |
| CLL022TD | chr2 | 89160995 | 89320097 | -0.9468 | 21 | -3.1892 | YES | chr2 | 89163662 | 89312731 | -0.6908 | 17 |     |
| CLL270TD | chr2 | 89160995 | 89327096 | -1.1610 | 23 | -3.8059 | YES | chr2 | 89132766 | 89312731 | -0.8242 | 23 |     |
| CLL040TD | chr2 | 89160995 | 89345875 | -0.7401 | 24 | -2.7909 | YES | chr2 | 89167033 | 89312731 | -0.2702 | 16 |     |
| CLL054TD | chr2 | 89160995 | 89345875 | -0.9161 | 26 | -3.1440 | YES | chr2 | 89163662 | 89312731 | -0.7494 | 17 |     |
| CLL152TD | chr2 | 89160995 | 89385101 | -0.8927 | 27 | -2.9719 | YES | chr2 | 89132766 | 89312731 | -0.7458 | 23 |     |
| CLL053TD | chr2 | 89160995 | 89417220 | -1.0671 | 30 | -3.1783 | YES | chr2 | 89163662 | 89430043 | -0.7718 | 28 |     |
| CLL136TD | chr2 | 89160995 | 89513294 | -0.9438 | 37 | -3.1657 | YES | chr2 | 89132766 | 90265260 | -0.5676 | 83 |     |
| CLL083TD | chr2 | 89160995 | 89533640 | -5.1079 | 38 | -6.3510 | YES | chr2 | 89163662 | 89203473 | -3.4564 | 4  |     |
| CLL159TD | chr2 | 89160995 | 89534308 | -4.4536 | 39 | -6.3688 | YES | chr2 | 89158240 | 89539015 | -1.7080 | 42 |     |
| CLL197TD | chr2 | 89160995 | 89534308 | -0.7321 | 39 | -2.9673 | YES | chr2 | 89163662 | 89534288 | -0.6896 | 36 |     |
| CLL006TD | chr2 | 89160995 | 89544964 | -5.2305 | 41 | -6.2867 | YES | chr2 | 89163662 | 89203473 | -4.0448 | 4  |     |
| CLL141TD | chr2 | 89160995 | 89568144 | -0.9846 | 44 | -3.0220 | YES | chr2 | 89163662 | 89450569 | -0.8406 | 31 |     |
| CLL322TD | chr2 | 89161356 | 89247203 | -6.4075 | 7  | -7.8980 | YES | chr2 | 89163662 | 89203473 | -3.1443 | 4  |     |
| CLL323TD | chr2 | 89161356 | 89290378 | -0.8738 | 12 | -3.6078 | YES | chr2 | 89163662 | 89276358 | -0.6652 | 8  |     |
| CLL277TD | chr2 | 89161356 | 89293214 | -0.9857 | 16 | -3.5029 | YES | chr2 | 89132766 | 89276358 | -0.8001 | 14 |     |
| CLL064TD | chr2 | 89161356 | 89320097 | -0.8767 | 19 | -3.2495 | NO  |      |          |          |         |    | IGK |
| CLL275TD | chr2 | 89161356 | 89320097 | -0.9910 | 20 | -3.6162 | YES | chr2 | 89132766 | 89312731 | -0.7727 | 23 |     |
| CLL280TD | chr2 | 89161356 | 89327096 | -8.2141 | 22 | -7.1460 | YES | chr2 | 89132766 | 89312731 | -2.7372 | 23 |     |
| CLL157TD | chr2 | 89161356 | 89385101 | -8.3899 | 26 | -6.6945 | YES | chr2 | 89163662 | 89203473 | -3.8841 | 4  |     |
| CLL188TD | chr2 | 89161356 | 89399319 | -0.8845 | 26 | -3.0600 | YES | chr2 | 89163662 | 89312731 | -0.8007 | 17 |     |
| CLL049TD | chr2 | 89161356 | 89399739 | -3.5881 | 28 | -6.0743 | YES | chr2 | 89163662 | 89312731 | -2.3126 | 17 |     |
| CLL148TD | chr2 | 89161356 | 89417220 | -0.9248 | 29 | -3.0407 | NO  |      |          |          |         |    | IGK |
| CLL191TD | chr2 | 89161356 | 89459703 | -1.0099 | 33 | -3.2878 | YES | chr2 | 89132766 | 89475572 | -0.7996 | 38 |     |
| CLL273TD | chr2 | 89161356 | 89512875 | -1.0439 | 35 | -2.7556 | YES | chr2 | 89159933 | 89508208 | -0.7447 | 38 |     |
| CLL181TD | chr2 | 89161356 | 89544238 | -0.8486 | 38 | -3.0251 | YES | chr2 | 89163662 | 89539015 | -0.7093 | 36 |     |
| CLL017TD | chr2 | 89161356 | 89544964 | -5.9335 | 40 | -6.4746 | YES | chr2 | 89163662 | 89430043 | -2.9179 | 27 |     |
| CLL027TD | chr2 | 89161356 | 89544964 | -5.0820 | 40 | -6.2860 | YES | chr2 | 89163662 | 89312731 | -2.9040 | 17 |     |
| CLL155TD | chr2 | 89161356 | 89568144 | -1.2157 | 41 | -3.5311 | YES | chr2 | 89163662 | 89596790 | -0.6940 | 40 |     |
| CLL146TD | chr2 | 89185051 | 89320097 | -0.7593 | 19 | -3.4230 | YES | chr2 | 89132766 | 89312731 | -0.6997 | 23 |     |
| CLL174TD | chr2 | 89185051 | 89327096 | -5.9416 | 21 | -7.0279 | YES | chr2 | 89163662 | 89450569 | -2.3986 | 30 |     |
| CLL019TD | chr2 | 89185051 | 89417220 | -0.7664 | 28 | -2.5157 | NO  |      |          |          |         |    | IGK |
| CLL290TD | chr2 | 89185051 | 89533640 | -0.8235 | 36 | -3.0235 | YES | chr2 | 89163662 | 89534288 | -0.6866 | 36 |     |
| CLL173TD | chr2 | 89185051 | 89567725 | -0.9979 | 41 | -3.0644 | NO  |      |          |          |         |    | IGK |
| CLL276TD | chr2 | 89246786 | 89345454 | -1.1372 | 19 | -3.2373 | YES | chr2 | 89243618 | 89312731 | -0.5947 | 13 |     |
| CLL272TD | chr2 | 89246786 | 89513294 | -1.1561 | 30 | -3.7656 | YES | chr2 | 89199456 | 89508208 | -0.9253 | 28 |     |
| CLL023TD | chr2 | 89246786 | 89544964 | -1.1567 | 34 | -3.4086 | YES | chr2 | 89216786 | 89480685 | -0.6437 | 28 |     |
| CLL029TD | chr2 | 89246786 | 89544964 | -0.7752 | 34 | -2.5370 | YES | chr2 | 89198090 | 89430043 | -0.7328 | 23 |     |
| CLL020TD | chr2 | 89246786 | 89544964 | -0.8032 | 35 | -2.5707 | YES | chr2 | 89243618 | 89312731 | -0.7356 | 13 |     |
| CLL184TD | chr2 | 89246786 | 89986315 | -0.9825 | 40 | -2.7978 | YES | chr2 | 89247673 | 89508208 | -0.7063 | 27 |     |
| CLL322TD | chr2 | 89265748 | 89513294 | -0.7624 | 28 | -2.7642 | YES | chr2 | 89266299 | 89508208 | -0.4556 | 24 |     |
| CLL168TD | chr2 | 89277955 | 89475786 | -0.7927 | 26 | -2.2758 | YES | chr2 | 89312331 | 90265260 | -0.2797 | 59 |     |
| CLL009TD | chr2 | 89291895 | 89339688 | -0.6891 | 11 | -2.7166 | NO  |      |          |          |         |    | IGK |
| CLL005TD | chr2 | 89291895 | 89345875 | -3.6552 | 13 | -5.5784 | YES | chr2 | 89129332 | 89480685 | -0.7712 | 40 |     |
| CLL171TD | chr2 | 89291895 | 89385101 | -1.0970 | 13 | -3.8686 | NO  |      |          |          |         |    | IGK |
| CLL038TD | chr2 | 89309863 | 89534308 | -0.8304 | 21 | -2.6062 | NO  |      |          |          |         |    | IGK |
| CLL022TD | chr2 | 89326635 | 90414113 | 0.6507  | 58 | 2.8512  | YES | chr2 | 89427165 | 90253749 | 0.6324  | 43 |     |
| CLL278TD | chr2 | 89385101 | 89513294 | -4.0207 | 12 | -6.1681 | YES | chr2 | 89132766 | 89508208 | -1.9548 | 39 |     |
| CLL005TD | chr2 | 89385101 | 89568144 | -0.9056 | 18 | -2.5695 | YES | chr2 | 89129332 | 89480685 | -0.7712 | 40 |     |
| CLL174TD | chr2 | 89399319 | 89475786 | -7.3360 | 9  | -6.3936 | YES | chr2 | 89163662 | 89450569 | -2.3986 | 30 |     |
| CLL157TD | chr2 | 89399319 | 89568144 | -1.3725 | 17 | -2.7942 | YES | chr2 | 89427166 | 90093173 | -0.4054 | 26 |     |
| CLL049TD | chr2 | 89416800 | 89952847 | -0.6986 | 16 | -2.0256 | YES | chr2 | 89427166 | 90093173 | -0.2987 | 26 |     |
| CLL282TD | chr2 | 89442025 | 89544964 | -0.8066 | 11 | -3.0150 | NO  |      |          |          |         |    | IGK |
| CLL136TD | chr2 | 89533640 | 89568144 | -1.9407 | 6  | -3.2386 | YES | chr2 | 89132766 | 90265260 | -0.5676 | 83 |     |
| CLL194TD | chr2 | 89533640 | 89568144 | -0.7773 | 6  | -2.3608 | YES | chr2 | 89533889 | 90093173 | -0.6219 | 17 |     |
| CLL082TD | chr2 | 89952847 | 90249067 | -1.1368 | 31 | -2.4598 | YES | chr2 | 89158240 | 90226606 | -1.7380 | 72 |     |
| CLL008TD | chr2 | 89976153 | 91963931 | 0.4251  | 66 | 1.6177  | YES | chr2 | 89533889 | 91815879 | 0.2988  | 51 |     |
| CLL273TD | chr2 | 90153708 | 90259920 | -0.9064 | 17 | -1.6899 | YES | chr2 | 90226206 | 90253749 | -0.8810 | 4  |     |
| CLL278TD | chr2 | 90192914 | 90261664 | -1.2169 | 17 | -2.3904 | YES | chr2 | 90012137 | 90265260 | -0.5540 | 29 |     |
| CLL136TD | chr2 | 90192914 | 91723047 | -0.7809 | 22 | -2.2314 | YES | chr2 | 89132766 | 90265260 | -0.5676 | 83 |     |
| CLL148TD | chr2 | 90211703 | 90259920 | -0.9871 | 13 | -2.3221 | YES | chr2 | 90226206 | 90253749 | -0.7617 | 4  |     |
| CLL146TD | chr2 | 90218695 | 90259920 | -1.2370 | 11 | -2.6152 | YES | chr2 | 90226206 | 90240890 | -1.0300 | 2  |     |

|          |       |           |           |          |     |          |     |       |           |           |         |      |  |  |
|----------|-------|-----------|-----------|----------|-----|----------|-----|-------|-----------|-----------|---------|------|--|--|
| CLL020TD | chr2  | 90414113  | 95458020  | 0.3657   | 45  | 2.1838   | NO  |       |           |           |         |      |  |  |
| CLL022TD | chr2  | 91766525  | 95458020  | 0.5419   | 40  | 2.8444   | NO  |       |           |           |         |      |  |  |
| CLL008TD | chr2  | 91968412  | 92118294  | 0.9149   | 12  | 2.9807   | NO  |       |           |           |         |      |  |  |
| CLL290TD | chr2  | 111395518 | 112252405 | -0.6467  | 52  | -3.1365  | YES | chr2  | 111391997 | 112490498 | -0.6445 | 52   |  |  |
| CLL275TD | chr2  | 128397592 | 128412342 | 0.6969   | 9   | 1.7534   | NO  |       |           |           |         |      |  |  |
| CLL191TD | chr2  | 131128755 | 131266247 | 0.6333   | 6   | 2.3401   | NO  |       |           |           |         |      |  |  |
| CLL048TD | chr2  | 233410189 | 240002779 | -0.6051  | 548 | -2.9720  | YES | chr2  | 232954062 | 243041505 | -0.5994 | 961  |  |  |
| CLL048TD | chr2  | 240048039 | 241514412 | -0.5532  | 68  | -2.5511  | YES | chr2  | 232954062 | 243041505 | -0.5994 | 961  |  |  |
| CLL048TD | chr2  | 241888334 | 242122775 | -0.4401  | 59  | -2.4482  | YES | chr2  | 232954062 | 243041505 | -0.5994 | 961  |  |  |
| CLL048TD | chr2  | 242169475 | 243080908 | -0.4830  | 124 | -2.5187  | YES | chr2  | 232954062 | 243041505 | -0.5994 | 961  |  |  |
| CLL020TD | chr20 | 68319     | 17596034  | -0.6355  | 976 | -2.5639  | YES | chr20 | 14781213  | 14826157  | -1.3738 | 0    |  |  |
| CLL020TD | chr20 | 17596522  | 29612290  | -0.4681  | 493 | -2.0619  | YES | chr20 | 17666114  | 26193955  | -0.4327 | 471  |  |  |
| CLL043TD | chr20 | 29614140  | 29647090  | 0.5403   | 12  | 2.6689   | NO  |       |           |           |         |      |  |  |
| CLL148TD | chr20 | 31035315  | 31062354  | 0.7721   | 8   | 1.8309   | NO  |       |           |           |         |      |  |  |
| CLL191TD | chr20 | 60882407  | 60902255  | 0.5736   | 24  | 1.8246   | NO  |       |           |           |         |      |  |  |
| CLL191TD | chr20 | 61950773  | 61960913  | 0.7516   | 13  | 1.7355   | NO  |       |           |           |         |      |  |  |
| CLL141TD | chr21 | 15745911  | 16336974  | -0.8867  | 25  | -3.6095  | YES | chr21 | 15711781  | 16958298  | -0.7604 | 25   |  |  |
| CLL280TD | chr22 | 22385540  | 22724128  | -0.8774  | 23  | -3.1085  | YES | chr22 | 22381553  | 22722107  | -0.8807 | 22   |  |  |
| CLL168TD | chr22 | 22385540  | 22735388  | -0.6581  | 26  | -2.4848  | YES | chr22 | 22385947  | 22748867  | -0.6599 | 25   |  |  |
| CLL182TD | chr22 | 22556219  | 22657565  | -1.8207  | 7   | -3.2332  | YES | chr22 | 22551038  | 23241689  | -0.8108 | 70   |  |  |
| CLL182TD | chr22 | 22658390  | 23241756  | -1.0228  | 64  | -3.6058  | YES | chr22 | 22551038  | 23241689  | -0.8108 | 70   |  |  |
| CLL278TD | chr22 | 22724128  | 22975934  | -0.8894  | 22  | -3.8973  | YES | chr22 | 22713221  | 23244777  | -0.7171 | 51   |  |  |
| CLL280TD | chr22 | 22730538  | 23241756  | -9.1392  | 46  | -7.9127  | YES | chr22 | 22724404  | 23247059  | -2.8660 | 47   |  |  |
| CLL189TD | chr22 | 22735388  | 23114750  | -0.4651  | 36  | -2.2611  | YES | chr22 | 22825827  | 23247059  | -0.5367 | 43   |  |  |
| CLL136TD | chr22 | 22735388  | 23223249  | -0.8792  | 42  | -4.0428  | YES | chr22 | 22733651  | 23234829  | -0.6759 | 42   |  |  |
| CLL045TD | chr22 | 22735388  | 23235817  | -0.9112  | 44  | -3.6092  | YES | chr22 | 22736444  | 23234829  | -0.7498 | 42   |  |  |
| CLL090TD | chr22 | 22735388  | 23165257  | -1.0235  | 44  | -3.6300  | YES | chr22 | 22736444  | 23247059  | -0.8489 | 50   |  |  |
| CLL064TD | chr22 | 22735388  | 23247126  | -1.0508  | 49  | -3.6034  | YES | chr22 | 22736444  | 23247059  | -0.8703 | 47   |  |  |
| CLL168TD | chr22 | 22749500  | 23247126  | -2.6228  | 48  | -6.2688  | YES | chr22 | 22749794  | 23247059  | -1.8130 | 47   |  |  |
| CLL173TD | chr22 | 22782035  | 22906026  | -9.0236  | 12  | -10.2824 | YES | chr22 | 22765216  | 23247059  | -2.4999 | 45   |  |  |
| CLL173TD | chr22 | 22930830  | 23247126  | -6.7858  | 34  | -6.3368  | YES | chr22 | 22765216  | 23247059  | -2.4999 | 45   |  |  |
| CLL042TD | chr22 | 22984803  | 23264746  | -0.3468  | 34  | -2.0362  | YES | chr22 | 23026882  | 23246029  | -0.3974 | 23   |  |  |
| CLL278TD | chr22 | 22989137  | 23247126  | -0.8146  | 27  | -2.5712  | YES | chr22 | 22713221  | 23244777  | -0.7171 | 51   |  |  |
| CLL020TD | chr22 | 23046981  | 23241756  | -0.9664  | 20  | -3.1815  | YES | chr22 | 23041645  | 23241689  | -0.8852 | 19   |  |  |
| CLL019TD | chr22 | 23055479  | 23241756  | -0.6726  | 19  | -3.1363  | YES | chr22 | 23056362  | 23240427  | -0.7890 | 17   |  |  |
| CLL006TD | chr22 | 23063315  | 23247126  | -5.7736  | 19  | -6.7538  | YES | chr22 | 23056362  | 23247059  | -3.0147 | 18   |  |  |
| CLL009TD | chr22 | 23063315  | 23247126  | -0.8632  | 19  | -2.7997  | YES | chr22 | 23056362  | 23247059  | -0.8457 | 18   |  |  |
| CLL082TD | chr22 | 23077248  | 23241756  | -1.0199  | 17  | -3.8283  | YES | chr22 | 23064017  | 23239061  | -0.7084 | 16   |  |  |
| CLL272TD | chr22 | 23077248  | 23241756  | -0.9569  | 17  | -3.3931  | YES | chr22 | 23085408  | 23241689  | -0.7889 | 15   |  |  |
| CLL029TD | chr22 | 23101171  | 23223249  | -7.0442  | 12  | -6.7989  | YES | chr22 | 23094250  | 23234829  | -3.2471 | 12   |  |  |
| CLL018TD | chr22 | 23101171  | 23237534  | -0.9201  | 14  | -3.0871  | YES | chr22 | 23103564  | 23247059  | -0.8098 | 13   |  |  |
| CLL146TD | chr22 | 23114750  | 23235817  | -6.8565  | 11  | -7.2343  | YES | chr22 | 23108423  | 23234829  | -2.4126 | 10   |  |  |
| CLL041TD | chr22 | 23114750  | 23241756  | -2.5279  | 13  | -5.7025  | YES | chr22 | 23103564  | 23244777  | -1.7194 | 13   |  |  |
| CLL189TD | chr22 | 23134963  | 23247126  | -1.2274  | 13  | -3.7914  | YES | chr22 | 22825827  | 23247059  | -0.5367 | 43   |  |  |
| CLL276TD | chr22 | 23135163  | 23247126  | -0.8349  | 12  | -2.6336  | YES | chr22 | 23138710  | 23247059  | -0.6702 | 10   |  |  |
| CLL032TD | chr22 | 23135163  | 23256401  | -0.6361  | 14  | -2.8456  | YES | chr22 | 23138710  | 23258429  | -0.6904 | 13   |  |  |
| CLL178TD | chr22 | 23154453  | 23223249  | -10.0000 | 7   | -6.8542  | YES | chr22 | 23094250  | 23241689  | -2.7407 | 14   |  |  |
| CLL194TD | chr22 | 23165454  | 23241756  | -1.0530  | 7   | -3.7821  | YES | chr22 | 23165575  | 23241689  | -0.7516 | 6    |  |  |
| CLL090TD | chr22 | 23165454  | 23247126  | -4.2365  | 8   | -5.5748  | YES | chr22 | 22736444  | 23247059  | -0.8489 | 50   |  |  |
| CLL173TD | chr22 | 29611477  | 29664292  | -0.9553  | 14  | -1.7096  | NO  |       |           |           |         |      |  |  |
| CLL082TD | chr22 | 29630096  | 29654719  | -1.1664  | 6   | -1.6548  | NO  |       |           |           |         |      |  |  |
| CLL030TD | chr22 | 39224254  | 39353650  | -1.6392  | 7   | -1.8007  | NO  |       |           |           |         |      |  |  |
| CLL274TD | chr22 | 46318645  | 46508605  | 0.9931   | 11  | 1.6096   | NO  |       |           |           |         |      |  |  |
| CLL064TD | chr22 | 47243690  | 51237147  | -1.1043  | 384 | -2.4403  | YES | chr22 | 47218653  | 51224402  | -0.9280 | 383  |  |  |
| CLL023TD | chr3  | 361444    | 4403822   | -0.7572  | 110 | -3.5738  | YES | chr3  | 61875     | 5848545   | -0.7837 | 205  |  |  |
| CLL023TD | chr3  | 4417953   | 6903034   | -0.9197  | 96  | -4.8966  | YES | chr3  | 61875     | 5848545   | -0.7837 | 205  |  |  |
| CLL141TD | chr3  | 47030690  | 48921373  | -1.1265  | 499 | -3.4846  | YES | chr3  | 47031601  | 48917211  | -1.0435 | 496  |  |  |
| CLL174TD | chr3  | 47437579  | 47476412  | -1.0411  | 31  | -2.9290  | YES | chr3  | 47416540  | 47522517  | -0.8446 | 32   |  |  |
| CLL174TD | chr3  | 47852127  | 48450938  | -0.9519  | 92  | -4.1059  | YES | chr3  | 47851098  | 49978951  | -0.8177 | 692  |  |  |
| CLL174TD | chr3  | 48451249  | 48462564  | -1.3742  | 22  | -2.6436  | YES | chr3  | 47851098  | 49978951  | -0.8177 | 692  |  |  |
| CLL174TD | chr3  | 48463073  | 49977893  | -1.0145  | 578 | -3.1083  | YES | chr3  | 47851098  | 49978951  | -0.8177 | 692  |  |  |
| CLL275TD | chr3  | 51467454  | 51624541  | -0.4248  | 16  | -1.7265  | NO  |       |           |           |         |      |  |  |
| CLL048TD | chr3  | 118945621 | 122591232 | 0.3961   | 401 | 3.3587   | YES | chr3  | 118985758 | 197840480 | 0.4404  | 4761 |  |  |
| CLL048TD | chr3  | 122598047 | 122634528 | 0.9536   | 7   | 1.9689   | YES | chr3  | 118985758 | 197840480 | 0.4404  | 4761 |  |  |
| CLL100TD | chr3  | 122630721 | 122642411 | -0.8681  | 8   | -1.6287  | NO  |       |           |           |         |      |  |  |
| CLL048TD | chr3  | 122642411 | 125731374 | 0.5052   | 293 | 2.5767   | YES | chr3  | 118985758 | 197840480 | 0.4404  | 4761 |  |  |
| CLL274TD | chr3  | 123014846 | 123036825 | 1.0001   | 7   | 1.7602   | NO  |       |           |           |         |      |  |  |
| CLL100TD | chr3  | 123213715 | 125735525 | 0.4992   | 245 | 3.5786   | YES | chr3  | 122827975 | 197840480 | 0.5264  | 4435 |  |  |
| CLL100TD | chr3  | 126326724 | 126682088 | 0.5648   | 25  | 4.2483   | YES | chr3  | 122827975 | 197840480 | 0.5264  | 4435 |  |  |
| CLL100TD | chr3  | 127337815 | 129902316 | 0.3148   | 280 | 2.5127   | YES | chr3  | 122827975 | 197840480 | 0.5264  | 4435 |  |  |
| CLL048TD | chr3  | 127395717 | 129262015 | 0.4791   | 200 | 2.4662   | YES | chr3  | 118985758 | 197840480 | 0.4404  | 4761 |  |  |
| CLL048TD | chr3  | 129269529 | 129695836 | 0.8263   | 35  | 1.6384   | YES | chr3  | 118985758 | 197840480 | 0.4404  | 4761 |  |  |
| CLL189TD | chr3  | 129284674 | 129302400 | -1.0279  | 11  | -1.8903  | NO  |       |           |           |         |      |  |  |
| CLL048TD | chr3  | 129740488 | 133553361 | 0.3691   | 352 | 3.6268   | YES | chr3  | 118985758 | 197840480 | 0.4404  | 4761 |  |  |
| CLL100TD | chr3  | 130087997 | 131068360 | 0.7251   | 114 | 5.3029   | YES | chr3  | 122827975 | 197840480 | 0.5264  | 4435 |  |  |
| CLL100TD | chr3  | 131101945 | 132437792 | 0.7387   | 154 | 4.7331   | YES | chr3  | 122827975 | 197840480 | 0.5264  | 4435 |  |  |
| CLL100TD | chr3  | 132438491 | 138213827 | 0.5101   | 328 | 3.9642   | YES | chr3  | 122827975 | 197840480 | 0.5264  | 4435 |  |  |
| CLL048TD | chr3  | 133556966 | 133698243 | 0.7874   | 20  | 2.2541   | YES | chr3  | 118985758 | 197840480 | 0.4404  | 4761 |  |  |

|          |      |           |           |         |      |         |     |      |           |           |         |      |          |
|----------|------|-----------|-----------|---------|------|---------|-----|------|-----------|-----------|---------|------|----------|
| CLL048TD | chr3 | 133876932 | 139180922 | 0.4395  | 315  | 3.1558  | YES | chr3 | 118985758 | 197840480 | 0.4404  | 4761 |          |
| CLL110TD | chr3 | 138213827 | 138347883 | 0.3503  | 21   | 1.6341  | NO  |      |           |           |         |      |          |
| CLL100TD | chr3 | 138216852 | 138477949 | 0.7059  | 45   | 5.1744  | YES | chr3 | 122827975 | 197840480 | 0.5264  | 4435 |          |
| CLL100TD | chr3 | 139062804 | 150419876 | 0.6778  | 563  | 4.5470  | YES | chr3 | 122827975 | 197840480 | 0.5264  | 4435 |          |
| CLL048TD | chr3 | 139257561 | 183776174 | 0.3933  | 1830 | 3.5552  | YES | chr3 | 118985758 | 197840480 | 0.4404  | 4761 |          |
| CLL082TD | chr3 | 143185835 | 143236876 | -0.8840 | 6    | -3.7155 | YES | chr3 | 143106361 | 143252946 | -0.8052 | 6    |          |
| CLL100TD | chr3 | 150588782 | 156876649 | 0.6688  | 274  | 4.9933  | YES | chr3 | 122827975 | 197840480 | 0.5264  | 4435 |          |
| CLL100TD | chr3 | 156978860 | 183059312 | 0.6781  | 932  | 4.8166  | YES | chr3 | 122827975 | 197840480 | 0.5264  | 4435 |          |
| CLL100TD | chr3 | 183097021 | 183857816 | 0.4410  | 124  | 3.6058  | YES | chr3 | 122827975 | 197840480 | 0.5264  | 4435 |          |
| CLL048TD | chr3 | 183777205 | 184070039 | 0.6049  | 177  | 2.0672  | YES | chr3 | 118985758 | 197840480 | 0.4404  | 4761 |          |
| CLL189TD | chr3 | 184099493 | 184296137 | -0.4372 | 25   | -1.6806 | NO  |      |           |           |         |      |          |
| CLL100TD | chr3 | 184428553 | 185183472 | 0.6864  | 72   | 5.2808  | YES | chr3 | 122827975 | 197840480 | 0.5264  | 4435 |          |
| CLL048TD | chr3 | 184429154 | 195485943 | 0.4318  | 635  | 3.1223  | YES | chr3 | 118985758 | 197840480 | 0.4404  | 4761 |          |
| CLL100TD | chr3 | 185184562 | 188425967 | 0.4814  | 238  | 3.6273  | YES | chr3 | 122827975 | 197840480 | 0.5264  | 4435 |          |
| CLL100TD | chr3 | 188464219 | 193677537 | 0.6887  | 205  | 4.5149  | YES | chr3 | 122827975 | 197840480 | 0.5264  | 4435 |          |
| CLL100TD | chr3 | 194124710 | 194309252 | 0.6866  | 32   | 4.7116  | YES | chr3 | 122827975 | 197840480 | 0.5264  | 4435 |          |
| CLL100TD | chr3 | 194346582 | 194390650 | 0.6598  | 15   | 4.6293  | YES | chr3 | 122827975 | 197840480 | 0.5264  | 4435 |          |
| CLL100TD | chr3 | 194947391 | 195426162 | 0.6686  | 47   | 3.6560  | YES | chr3 | 122827975 | 197840480 | 0.5264  | 4435 |          |
| CLL100TD | chr3 | 195690188 | 195803892 | 0.5800  | 27   | 3.1515  | YES | chr3 | 122827975 | 197840480 | 0.5264  | 4435 |          |
| CLL048TD | chr3 | 195778753 | 197894524 | 0.4102  | 255  | 3.0118  | YES | chr3 | 118985758 | 197840480 | 0.4404  | 4761 |          |
| CLL100TD | chr3 | 195937427 | 196509460 | 0.4630  | 69   | 4.0153  | YES | chr3 | 122827975 | 197840480 | 0.5264  | 4435 |          |
| CLL064TD | chr3 | 196528787 | 196554015 | -0.7817 | 12   | -1.7148 | NO  |      |           |           |         |      |          |
| CLL100TD | chr3 | 196612028 | 196666092 | 0.5543  | 13   | 4.7394  | YES | chr3 | 122827975 | 197840480 | 0.5264  | 4435 |          |
| CLL100TD | chr3 | 196771486 | 197894524 | 0.5659  | 130  | 4.0686  | YES | chr3 | 122827975 | 197840480 | 0.5264  | 4435 |          |
| CLL267TD | chr4 | 420216    | 514821    | -0.3361 | 9    | -2.2863 | YES | chr4 | 421075    | 479412    | -0.7301 | 2    |          |
| CLL009TD | chr4 | 171525921 | 190882911 | -0.8190 | 562  | -3.7661 | YES | chr4 | 171423540 | 190916819 | -0.7784 | 566  |          |
| CLL030TD | chr5 | 1815937   | 2748537   | -0.8752 | 6    | -1.6465 | NO  |      |           |           |         |      |          |
| CLL178TD | chr6 | 395830    | 32427550  | 0.4234  | 2299 | 2.8874  | YES | chr6 | 387408    | 50073545  | 0.4160  | 4414 |          |
| CLL178TD | chr6 | 32548457  | 32609030  | 0.3704  | 6    | 2.0682  | YES | chr6 | 387408    | 50073545  | 0.4160  | 4414 |          |
| CLL178TD | chr6 | 32709201  | 32796601  | 0.4491  | 18   | 3.3952  | YES | chr6 | 387408    | 50073545  | 0.4160  | 4414 |          |
| CLL178TD | chr6 | 32797124  | 50681696  | 0.5202  | 2073 | 3.2795  | YES | chr6 | 387408    | 50073545  | 0.4160  | 4414 |          |
| CLL191TD | chr6 | 33084685  | 33138580  | 0.4796  | 23   | 1.6027  | NO  |      |           |           |         |      |          |
| CLL275TD | chr6 | 41533450  | 41558949  | 0.5164  | 11   | 1.7043  | NO  |      |           |           |         |      |          |
| CLL049TD | chr6 | 79911333  | 90305623  | -0.8027 | 471  | -3.7545 | YES | chr6 | 79892342  | 120465184 | -0.7504 | 1725 |          |
| CLL049TD | chr6 | 90321979  | 119669970 | -0.8049 | 1252 | -3.7773 | YES | chr6 | 79892342  | 120465184 | -0.7504 | 1725 |          |
| CLL186TD | chr7 | 933354    | 940151    | 0.8525  | 8    | 2.1271  | NO  |      |           |           |         |      |          |
| CLL019TD | chr7 | 40085409  | 40133673  | -0.9796 | 10   | -4.1262 | YES | chr7 | 40062122  | 40144404  | -0.8148 | 10   |          |
| CLL274TD | chr7 | 40899876  | 42065754  | 0.4098  | 12   | 1.7995  | NO  |      |           |           |         |      |          |
| CLL189TD | chr7 | 100159791 | 100175234 | -0.6941 | 15   | -1.8074 | NO  |      |           |           |         |      |          |
| CLL178TD | chr7 | 114563472 | 133580299 | -0.9634 | 981  | -3.7746 | YES | chr7 | 114334126 | 133589746 | -0.8731 | 981  |          |
| CLL041TD | chr7 | 142364197 | 142471717 | -0.5067 | 16   | -2.5878 | NO  |      |           |           |         |      |          |
| CLL017TD | chr7 | 142364382 | 142471717 | -1.0837 | 15   | -3.0099 | NO  |      |           |           |         |      |          |
| CLL030TD | chr7 | 150773805 | 150776527 | -0.9186 | 7    | -1.6947 | NO  |      |           |           |         |      |          |
| CLL290TD | chr8 | 142120    | 7056066   | -0.7127 | 230  | -3.3682 | YES | chr8 | 161272    | 29030957  | -0.7051 | 1532 |          |
| CLL043TD | chr8 | 142120    | 9634112   | -0.8545 | 303  | -3.3608 | YES | chr8 | 176293    | 41305627  | -0.6845 | 2125 |          |
| CLL282TD | chr8 | 163525    | 7005679   | -0.9576 | 227  | -3.9727 | YES | chr8 | 176654    | 34630057  | -0.8628 | 1705 |          |
| CLL290TD | chr8 | 7154524   | 11892002  | -0.7260 | 179  | -2.8024 | YES | chr8 | 161272    | 29030957  | -0.7051 | 1532 |          |
| CLL282TD | chr8 | 8090295   | 11952657  | -0.9943 | 157  | -3.7174 | YES | chr8 | 176654    | 34630057  | -0.8628 | 1705 |          |
| CLL043TD | chr8 | 9945493   | 11052602  | -0.8806 | 38   | -3.2094 | YES | chr8 | 176293    | 41305627  | -0.6845 | 2125 |          |
| CLL043TD | chr8 | 11152696  | 11660330  | -1.0237 | 44   | -3.3471 | YES | chr8 | 176293    | 41305627  | -0.6845 | 2125 |          |
| CLL043TD | chr8 | 11666261  | 12008379  | -0.5529 | 34   | -2.1287 | YES | chr8 | 176293    | 41305627  | -0.6845 | 2125 |          |
| CLL282TD | chr8 | 12040162  | 12250700  | -4.9347 | 9    | -1.9026 | YES | chr8 | 176654    | 34630057  | -0.8628 | 1705 |          |
| CLL290TD | chr8 | 12215407  | 29024875  | -0.7410 | 1120 | -3.2616 | YES | chr8 | 161272    | 29030957  | -0.7051 | 1532 |          |
| CLL043TD | chr8 | 12272529  | 39182704  | -0.7961 | 1607 | -3.4472 | YES | chr8 | 176293    | 41305627  | -0.6845 | 2125 |          |
| CLL282TD | chr8 | 12282445  | 21883070  | -0.9443 | 367  | -4.3620 | YES | chr8 | 176654    | 34630057  | -0.8628 | 1705 |          |
| CLL282TD | chr8 | 21890627  | 22059258  | -1.1987 | 87   | -2.7754 | YES | chr8 | 176654    | 34630057  | -0.8628 | 1705 |          |
| CLL191TD | chr8 | 21955519  | 21979076  | 0.5146  | 21   | 1.7883  | NO  |      |           |           |         |      |          |
| CLL282TD | chr8 | 22064280  | 34180476  | -0.9702 | 826  | -3.9682 | YES | chr8 | 176654    | 34630057  | -0.8628 | 1705 |          |
| CLL274TD | chr8 | 28608158  | 28635287  | 0.5715  | 6    | 1.6421  | NO  |      |           |           |         |      |          |
| CLL282TD | chr8 | 35383169  | 43415755  | 0.4476  | 638  | 3.1944  | YES | chr8 | 34638882  | 43388433  | 0.4766  | 637  |          |
| CLL043TD | chr8 | 39416134  | 41164188  | -0.6862 | 75   | -3.2870 | YES | chr8 | 176293    | 41305627  | -0.6845 | 2125 |          |
| CLL282TD | chr8 | 47886143  | 56015292  | -0.9481 | 277  | -4.5790 | YES | chr8 | 47777490  | 56161593  | -0.8713 | 277  |          |
| CLL178TD | chr8 | 56879244  | 67062402  | 0.4892  | 261  | 3.5577  | YES | chr8 | 56882676  | 86550838  | 0.5108  | 930  |          |
| CLL064TD | chr8 | 59515736  | 67341285  | 0.5497  | 191  | 4.2217  | YES | chr8 | 59529447  | 144292596 | 0.5558  | 3155 |          |
| CLL178TD | chr8 | 67064488  | 86392838  | 0.5811  | 671  | 4.1582  | YES | chr8 | 56882676  | 86550838  | 0.5108  | 930  |          |
| CLL064TD | chr8 | 67352355  | 68123663  | 0.4187  | 123  | 3.2839  | YES | chr8 | 59529447  | 144292596 | 0.5558  | 3155 |          |
| CLL064TD | chr8 | 68128800  | 95412458  | 0.5539  | 843  | 4.0851  | YES | chr8 | 59529447  | 144292596 | 0.5558  | 3155 |          |
| CLL290TD | chr8 | 92972427  | 97172447  | 0.4605  | 220  | 3.4571  | YES | chr8 | 92935342  | 146239365 | 0.4850  | 2470 |          |
| CLL064TD | chr8 | 95416265  | 100147772 | 0.4415  | 268  | 3.5017  | YES | chr8 | 59529447  | 144292596 | 0.5558  | 3155 |          |
| CLL290TD | chr8 | 97343228  | 103326936 | 0.4646  | 346  | 3.4300  | YES | chr8 | 92935342  | 146239365 | 0.4850  | 2470 |          |
| CLL064TD | chr8 | 100148876 | 144886210 | 0.5431  | 1826 | 3.7659  | YES | chr8 | 59529447  | 144292596 | 0.5558  | 3155 |          |
| CLL290TD | chr8 | 103355510 | 144459527 | 0.5322  | 1515 | 3.4928  | YES | chr8 | 92935342  | 146239365 | 0.4850  | 2470 |          |
| CLL145TD | chr8 | 110283176 | 143559513 | 0.5518  | 1217 | 4.0530  | YES | chr8 | 110274049 | 146294242 | 0.4730  | 1670 |          |
| CLL145TD | chr8 | 143560645 | 144652614 | 0.7346  | 112  | 2.4159  | YES | chr8 | 110274049 | 146294242 | 0.4730  | 1670 |          |
| CLL274TD | chr8 | 143603280 | 143624721 | 1.6797  | 6    | 1.7961  | NO  |      |           |           |         |      |          |
| CLL290TD | chr8 | 144460417 | 145001106 | 0.4687  | 101  | 1.7807  | YES | chr8 | 92935342  | 146239365 | 0.4850  | 2470 |          |
| CLL145TD | chr8 | 144654158 | 145057016 | 0.5021  | 95   | 1.9805  | YES | chr8 | 110274049 | 146294242 | 0.4730  | 1670 |          |
| CLL064TD | chr8 | 144889662 | 146277947 | 0.3392  | 310  | 1.8157  | NO  |      |           |           |         |      | SUBCLONE |

|          |      |           |           |         |     |         |     |      |           |           |         |      |          |
|----------|------|-----------|-----------|---------|-----|---------|-----|------|-----------|-----------|---------|------|----------|
| CLL290TD | chr8 | 145006781 | 145113376 | 0.6070  | 43  | 2.1107  | YES | chr8 | 92935342  | 146239365 | 0.4850  | 2470 |          |
| CLL145TD | chr8 | 145058163 | 146279336 | 0.6865  | 246 | 2.7676  | YES | chr8 | 110274049 | 146294242 | 0.4730  | 1670 |          |
| CLL290TD | chr8 | 145134798 | 145542116 | 0.4294  | 60  | 1.9806  | YES | chr8 | 92935342  | 146239365 | 0.4850  | 2470 |          |
| CLL290TD | chr8 | 145544967 | 146277947 | 0.5117  | 154 | 2.1724  | YES | chr8 | 92935342  | 146239365 | 0.4850  | 2470 |          |
| CLL266TD | chr9 | 14750     | 116709    | -0.3767 | 6   | 1.8259  | NO  |      |           |           |         |      |          |
| CLL155TD | chr9 | 14806631  | 15019428  | -0.3135 | 19  | -2.4373 | NO  |      |           |           |         |      | SUBCLONE |
| CLL155TD | chr9 | 20294882  | 26116054  | -0.3593 | 115 | -1.9117 | NO  |      |           |           |         |      | SUBCLONE |
| CLL110TD | chr9 | 33465663  | 33472186  | -0.4934 | 15  | -1.9860 | NO  |      |           |           |         |      |          |
| CLL083TD | chr9 | 70484362  | 75906141  | -0.7681 | 278 | -3.4753 | YES | chr9 | 70984281  | 77075175  | -0.7101 | 274  |          |
| CLL110TD | chr9 | 90498873  | 90589233  | -0.4764 | 17  | -1.9858 | NO  |      |           |           |         |      |          |
| CLL186TD | chr9 | 95147866  | 95178890  | -0.8864 | 9   | -4.2291 | YES | chr9 | 95142442  | 95204491  | -0.8971 | 9    |          |
| CLL274TD | chr9 | 130658505 | 130687342 | 1.1617  | 7   | 1.9659  | NO  |      |           |           |         |      |          |
| CLL191TD | chr9 | 139752059 | 139754306 | 1.0479  | 6   | 2.0412  | NO  |      |           |           |         |      |          |
