# Supplementary material for: Estimation of Copy Number Alterations from Exome Sequencing Data
Source: PubMed Central journal article supplement (PMC3526607; doi:10.1371/journal.pone.0051422), 2012-12-19

**Figure S1.** Comparison of the number of exons involved in CNAs detected by exome2cnv and aCGH.

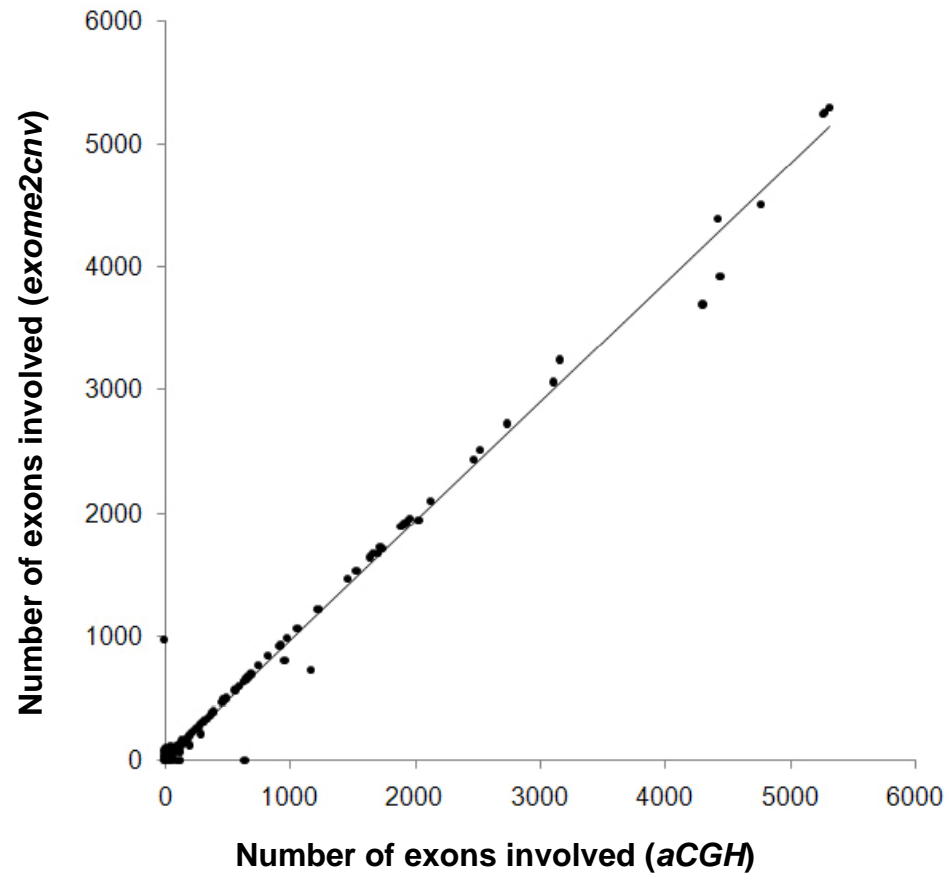

Supplement: pone.0051422.s003.pdf [file pone.0051422.s003.pdf]
