# Supplementary material for: Estimation of Copy Number Alterations from Exome Sequencing Data
Source: PubMed Central journal article supplement (PMC3526607; doi:10.1371/journal.pone.0051422), 2012-12-19

**Figure S2.** aCGH data showing two cases (A and B) with a deletion affecting the short arm of chromosome 18 which was detected by exome2cnv but not by aCGH because it is present in a subpopulation of tumor cells. For comparison, a case (C) with a deletion affecting all tumor cells and detected by both methods is shown.

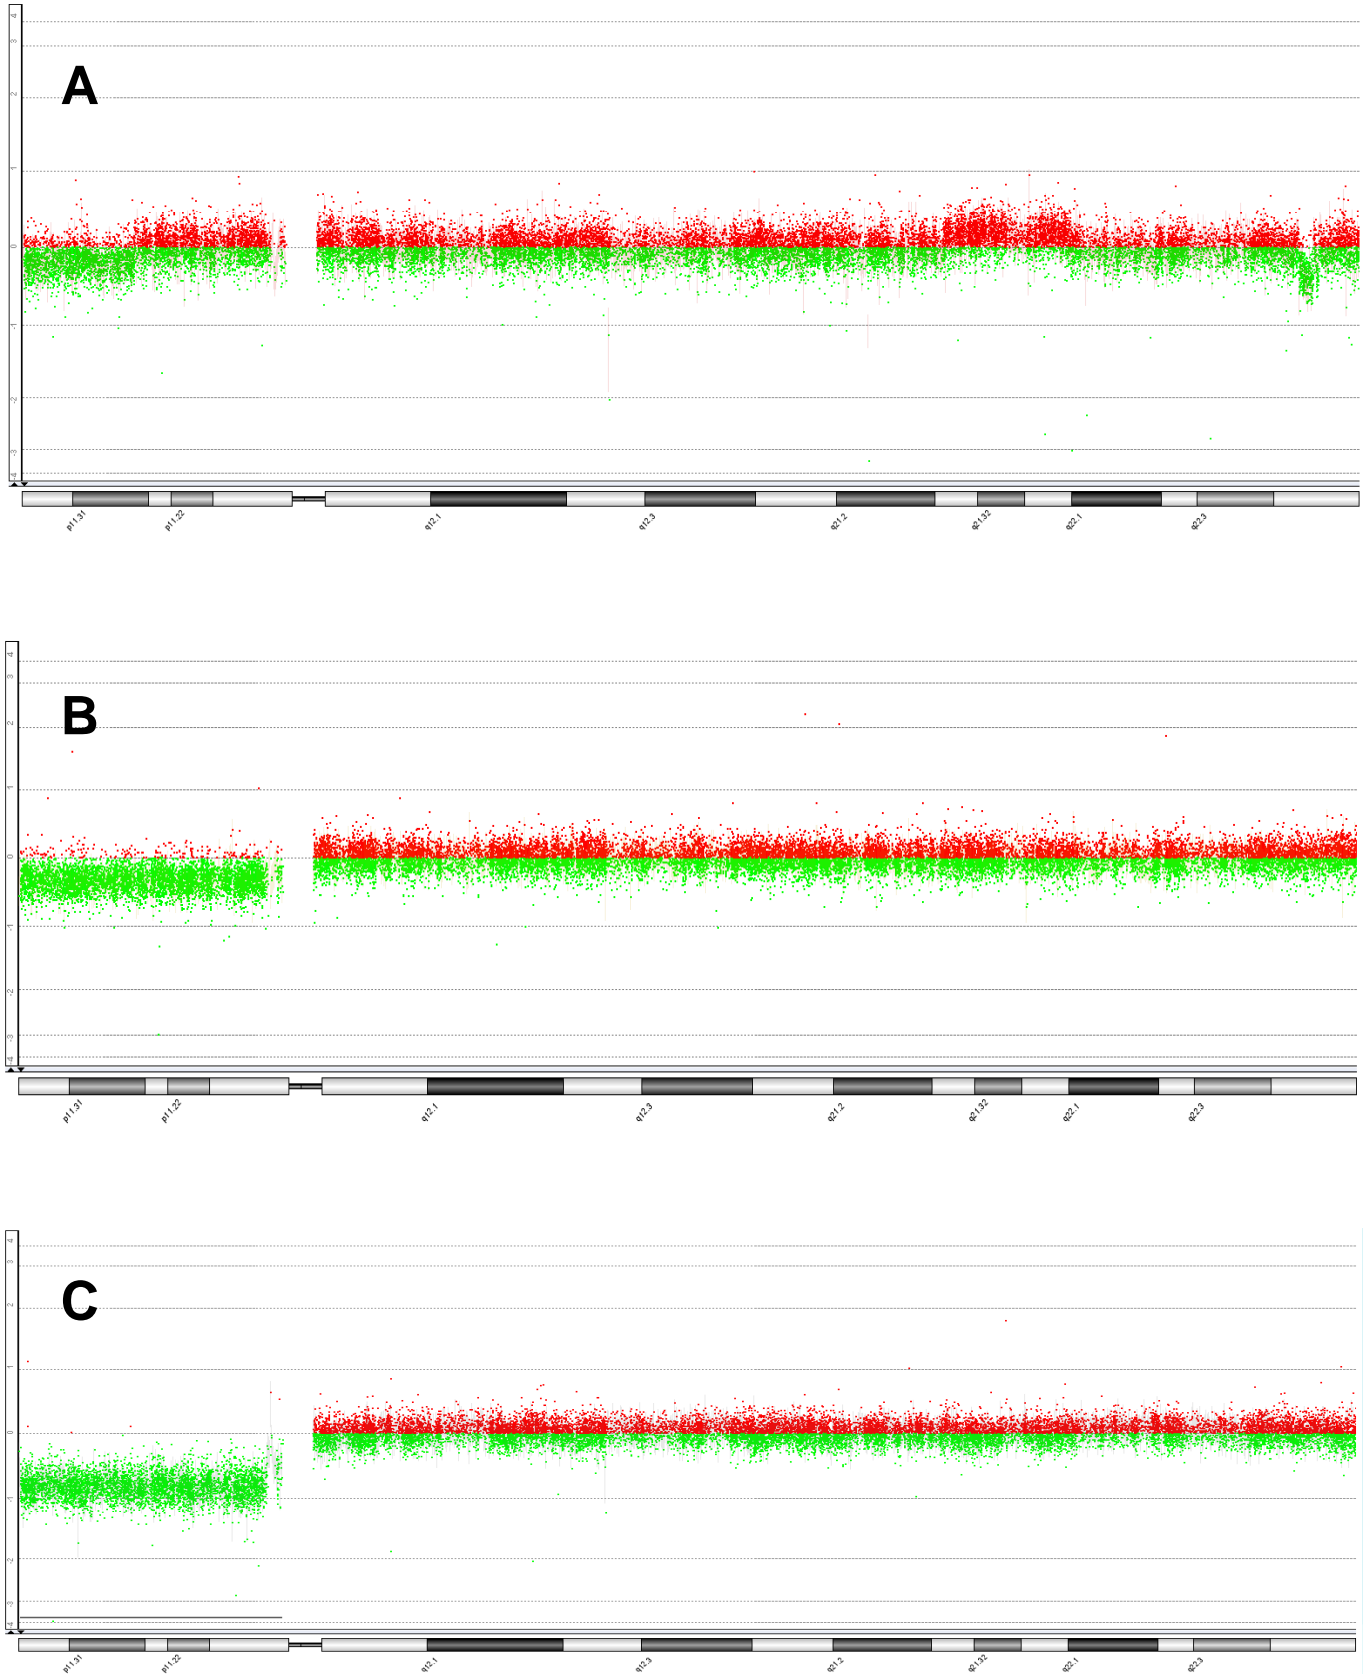

Supplement: pone.0051422.s004.pdf [file pone.0051422.s004.pdf]
